# Supplementary material
Source: ML conference proceedings conference paper supplement (https://aclanthology.org/2021.emnlp-main.145)
Supplement: Software [file f_cos_evaluation_and_characterization.xlsx]

## Sheet: Full Evaluation (f_cos)
test_utterance	positive_preference	no_critique_understanding_0	no_critique_understanding_1	no_critique_understanding_2	with_critique_understanding_0	with_critique_understanding_1	with_critique_understanding_2
I don't drink anymore.	I prefer a non-alcoholic beverages.	Drinks were tasty.	I wouldn't have it again.	First impossible I've had and I can guarantee that I'll be having more.	Drinks are all well done.	Great drinks.	Excellent drinks , just okay food.
I'm too tired and hungry to wait.	I prefer a place with faster service.	I could have eaten it all night.	i needed a nap!	I was to full to have dessert!	Great place & service at reasonable prices.	Superior service, excellent food and drinks.	The service is rapid, prices are convenient, good atmosphere.
That's somewhat unimaginative.	I prefer a more creative place.	Bit of a tourist-trap though.	other than that, it's good.	I'm impressed!	Really like this place	This place has a great design.	Decent place.
Food trucks are usually too greasy.	I prefer a more formal restaurant.	The Grill has solid food.	Very greasy chicken but burgers were excellent!!!	Food is good, open late and a drive thru !!	Superior restaurant, the only place I will have the dim sum.	The best restaurant around here.	Overall a great place for a date or a family dinner.
That's not a very filling food.	I prefer a more heavy food.	Nice dinner setting, with huge portions.	All in all a great meal.	One of the bests meals	Large enough for two meals!	I order medium well.	Smaller portions, but very tasty
I'm not into fast food.	I prefer more refined food.	Good food for being fast food	It's mainly a drive thru.	Food is good, open late and a drive thru !!	Quality Meals, mmm, my favorite treat.	Food is absolutely delicious and there are so many choices!	On the pricier side and decently fresh.
My oldest just graduated.	I prefer a place that is good for celebrating.	I celebrated my graduation today in this fine place.	Took my daughter for a birthday lunch.	Came here yesterday with my family at around 9.	If you're looking for somewhere memorable to celebrate a special occasion, I absolutely recommend this place.	Great spot for a special occasion or celebration especially on a beautiful summer night.	If i live in Chicago this would be the place I'd go to for every celebration.
My doctor told me I needed to lower my cholesterol.	I prefer a more health-conscious place.	I'm vegan for health reasons.	Food is so good and feels like I'm eating healthy even of	Think we finally tasted all 8 meats.	Always a good place to take tourists/friends visiting from out of town	Decent place.	Everything about the place is excellent/outstanding.
I'm not a very adventurous eater.	I prefer familiar food.	I could have eaten it all night.	I was to full to have dessert!	One of the bests meals	I just love their food.	One of my preferred places for tasty Quality Meals.	One of my favorite locations for tasty Quality Meals.
You know what? I got my paycheck today.	I prefer an expensive place.	It was worth every penny.	Great way to spend the evening!	It was worth every second and every penny.	A nice place to splurge on.	elegant, upscale and classy place for a special occasion.	Nice place for a date night.
This dish seems too bizarre.	I prefer traditional cuisine.	One of the bests meals	Once again a perfect meal.	One of the best meals I‚Äôve ever had.	Delicious and a wide variety of dishes.	It was by far my favorite Italian cuisine compared to the other three	I grew up on the east coast eating a lot of good Italian food both in restaurants and homemade by family.
I have quite a big stash of cash available.	I prefer a more expensive place.	I comes with a particular price tag ...	A nice place to splurge on.	Good value for money.	Great place for quality meals.	A nice place to splurge on.	Great place & service at reasonable prices.
I don't want lamb.	I prefer beef.	I had the lamb and it was pretty damn good.	But I‚Äôm not a BBQ aficionado	I'll keep this short n sweet..AMAZING place if you want to grub on all kinds of meat..	I only eat Beef Brisket here because is delicious!	good meat!	Steak was delicious.
All of the produce that I eat comes straight from the farm.	I prefer local and organic ingredients.	Food is always great...lot of variety in veg and non	I'm vegan for health reasons.	Well prepared and delicious Indian food (I ate vegetarian food).	Excellent portions, fresh ingredients and a solid mainstream selection of things to taste.	Such a great selection of vegetarian & vegan options too!	On the pricier side and decently fresh.
Thai is my favorite.	I prefer Thai food.	Chinese food here - super tasty.	Chinese food... excellent.	, Thai iced I love coming here	Chinese food here - super tasty.	Chinese food... excellent.	Relative to Chinese food, it's fantastic.
I don't tend to like Italian food.	I prefer Chinese food.	It was one of my favorite Italian dishes I‚Äôve ever tried.	It was by far my favorite Italian cuisine compared to the other three	The best Italian food I've had in Chicago, so far.	Chinese food here - super tasty.	Chinese food... excellent.	Relative to Chinese food, it's fantastic.
I don't feel like eating fish.	I prefer chicken.	I'm vegan for health reasons.	The shrimp tasted so fresh!!	Everything delicious with an exception of the shrimps.	Chicken flautas are always delish.	Best Chicken	Chicken moist and tender.
Didn't seem kid-friendly.	I prefer a family-friendly place.	Very kid friendly.	TEENS AND KIDS ATLEAST	I was stuffed.	It's a nice place to go during the day with your children.	Overall a great place for a date or a family dinner.	Nice place for a date night.
I'm a total grazer.	I prefer a place with a lot of small dishes.	I am (üíÅüèº‚Äç	Everything is very good.	Filled me up.	a little pricey with some dishes better than others.	Delicious and a wide variety of dishes.	Superior restaurant, the only place I will have the dim sum.
Casual diners are usually lame.	I prefer a fine dining restaurant.	Food is good, open late and a drive thru !!	Excellent example of a service oriented restaurant.	Great food but service can be better.	Superior restaurant, the only place I will have the dim sum.	The best restaurant around here.	Top notch fine dining at its best!
I don't like American style cuisine.	I prefer international cuisine.	I grew up on the east coast eating a lot of good Italian food both in restaurants and homemade by family.	It was by far my favorite Italian cuisine compared to the other three	I just love their food.	It was by far my favorite Italian cuisine compared to the other three	Chinese food here - super tasty.	My fav place for Brazilian food.
There are some seafood that don't sit well with me.	I prefer beef or chicken.	Everything delicious with an exception of the shrimps.	Both lobster bisque and steak were little salty for me but overall great food and nice that they were served hot!	Got the seafood platter and it was fresh.	I only eat Beef Brisket here because is delicious!	Chicken flautas are always delish.	Chicken moist and tender.
I don't make too much money.	I prefer a cheaper place.	I comes with a particular price tag ...	I am just thankful that I didn't have to pay for this meal.	We enjoy to go out.	A nice place to splurge on.	Great place & service at reasonable prices.	Pricey but better than other options.
We're taking granpa and grandma to lunch.	I prefer a place that's good for seniors.	I had a very nice meal with my family.	Took my daughter for a birthday lunch.	My family and I went here today for my daughters	Their outdoor seating is informal and good for young folks.	Overall a great place for a date or a family dinner.	A great place for a meal or just cocktails and a view.
I see dirt spots all over.	I prefer a cleaner place.	RIGHT OFF THE FREEWAY AND DOWN	We came to this spot for lunch.	Very clean inside with funky decor.	Very clean inside with funky decor.	I also enjoy going to the Spa Before Dinner.	Very well kept and convenient place.
Today I'd like to splurge.	I prefer a more expensive place.	A nice place to splurge on.	Great way to spend the evening!	Prices are a little bit high, but it worth it.	Great place for quality meals.	A nice place to splurge on.	Great place & service at reasonable prices.
I'm with my daughter's soccer team.	I prefer a place with a kids' menu.	My family and I went here today for my daughters	My daughter and I had the asada quesadilla and Chile verde fries.	Took my daughter for a birthday lunch.	This is an affordable, kid-friendly place specialized in burgers and American food.	This is a 4 star, kid-friendly, vegetarian-friendly place that serves Italian food and pizza which also serves alcohol.	This is a 4 star, kid-friendly, vegetarian-friendly place that serves American food and desserts which also serves alcohol.
I don't like fancy food.	I prefer a more casual place.	Food is absolutely delicious and there are so many choices!	In recent memory, I can truly say I have not had a better dining experience.	But I‚Äôm not a BBQ aficionado	This is a great place for friends or a cute date night.	Great place to meet and catch up with friends.	Overall a great place for a date or a family dinner.
I don't have much cash to spare right now.	I prefer a cheaper place.	Pricey, yes, but	I comes with a particular price tag ...	A nice place to splurge on.	A nice place to splurge on.	Great place & service at reasonable prices.	Pricey but better than other options.
The sandwich is overstuffed.	I prefer more normal sandwiches.	Plate is small but delicious.	Large enough for two meals!	(On top of that my sandwich was delicious :) )	Fries make every sandwich and wrap taste 100x better!	Spicy chix sandwich is the best.	All the sides are delicious and large enough to share.
I do not like Thai food.	I prefer Italian food.	Chinese food here - super tasty.	Chinese food... excellent.	I love love love Indian food and have tested plenty of restaurants.	It was by far my favorite Italian cuisine compared to the other three	Greek food, mmm, awesome.	Best Italian food!
I'd rather not eat Bambi.	I prefer seafood.	I only eat Beef Brisket here because is delicious!	Steak was delicious.	But I‚Äôm not a BBQ aficionado	delicious steaks and seafood...	Everything delicious with an exception of the shrimps.	For dinner, I enjoyed the scallops one night and the sea bass the second.
I've been trying to eat healthy and avoid fast food.	I prefer healthy food.	Food is so good and feels like I'm eating healthy even of	Good food for being fast food	I'm vegan for health reasons.	Food is so good and feels like I'm eating healthy even of	I'm vegan for health reasons.	Food is soo delicious.
I try to limit my meat intake.	I prefer a more vegetarian place.	I'm vegan for health reasons.	I am a huge fan of steaks, so i love coming here for my month protein.	Food is so good and feels like I'm eating healthy even of	Such a great selection of vegetarian & vegan options too!	One of my preferred places for tasty Quality Meals.	Great place for quality meals.
Not a huge fan of Mexican cuisine.	I prefer Italian food.	Always amazing, high quality and real Mexican cuisine.	Best Mexican food love this place!	My fav place for Brazilian food.	It was by far my favorite Italian cuisine compared to the other three	Greek food, mmm, awesome.	Best Italian food!
I'm not a meat eater.	I prefer a vegetarian place.	I'm vegan for health reasons.	But I‚Äôm not a BBQ aficionado	I only eat Beef Brisket here because is delicious!	Such a great selection of vegetarian & vegan options too!	One of my preferred places for tasty Quality Meals.	Really nice restaurant if you want to eat some excellent meats.
I've spent too much on food this month.	I prefer a place with affordable prices.	I was to full to have dessert!	I could have eaten it all night.	I am just thankful that I didn't have to pay for this meal.	Quality food at a more than reasonable price.	Great place & service at reasonable prices.	I go here whenever I want something Good, filling, and great price..
I do eat red meat but not all of the time.	I prefer fish, chicken, or vegetarian food.	I only eat Beef Brisket here because is delicious!	I'm vegan for health reasons.	Steak was seasoned just the way I like it and a perfect medium rare to rare like requested.	I'm vegan for health reasons.	Lamb and beef plate is great, I get that with hummus veggies and rice.	delicious steaks and seafood...
I prefer chicken over red meat.	I prefer chicken.	Chicken flautas are always delish.	I only eat Beef Brisket here because is delicious!	Turkey burger and fries, both very tasty!	Chicken flautas are always delish.	Best Chicken	Chicken moist and tender.
The beef looks raw.	I prefer my steak well done.	Pork ribs didn't have much meat.	Meat was well seasoned and well cooked.	Fresh tasting beef - seared amazingly.	The food was excellent, I like my steak	Steak was seasoned just the way I like it and a perfect medium rare to rare like requested.	Steak was delicious.
The weather is too hot for that.	I prefer air conditioned rooms.	Air is constantly on, be prepared for the cold breeze.	Just kinda settled and warm.	Very hot and just the way	In good weather, I particularly enjoy the outdoor dining.	Comfortable dining environment.	Beautiful, relaxing rooftop terrace.
I have a couple of children with me.	I prefer a place that is more child friendly.	My family and I went here today for my daughters	Came here yesterday with my family at around 9.	I came with a baby (10mo) and they were so helpful and kind, overall my family	It's a nice place to go during the day with your children.	Overall a great place for a date or a family dinner.	This is a great place for friends or a cute date night.
I'm not in mood for vegetables.	I prefer a place that serves meat.	I'm vegan for health reasons.	I was to full to have dessert!	But I‚Äôm not a BBQ aficionado	but it is fine dining Very good restaurants for meat lovers, you can choose from all kinds of steaks.	My preferred location for delicious Burgers.	Really nice restaurant if you want to eat some excellent meats.
The table is not even clean.	I prefer a clean table.	Very clean inside with funky decor.	Nice decor	Very nice decor.	The rest of my table also enjoyed their meals.	Very clean inside with funky decor.	Comfortable dining environment.
I eat salads a few times a week but would rather have steak.	I prefer a place with great steaks.	I'm vegan for health reasons.	Lamb and beef plate is great, I get that with hummus veggies and rice.	I really love the Greek salad here with lamb and beef meat.	but it is fine dining Very good restaurants for meat lovers, you can choose from all kinds of steaks.	The food was excellent, I like my steak	Really nice restaurant if you want to eat some excellent meats.
It doesn't have a good view.	I prefer a more scenic place.	View is the best in the city.	Nothing beats the view.	It was by the window with a great view.	One of my favorite places!!	But the scenic view is the best experience.	My favourite location!
Fancy food is nice but not practical on my budget.	I prefer more affordable food.	a little pricey with some dishes better than others.	Good food for cheap.	But it was plenty to satisfy a craving for grilled meats, and I would come back if the dinner prices were a little cheaper.	Quality food at a more than reasonable price.	But it was plenty to satisfy a craving for grilled meats, and I would come back if the dinner prices were a little cheaper.	The price is amazing for the quality of food you get.
I don't feel like eating appetizers.	I prefer to get straight to the main course.	I was to full to have dessert!	I could have eaten it all night.	In recent memory, I can truly say I have not had a better dining experience.	Just pick your direction and enjoy.	This spot is the one I always prefer.	Both were good, and were different from anything else we‚Äôd had, but I felt the preceding courses were better.
Trendy places are overrated.	I prefer classic places.	Probably the best in downtown area.	Always stay downtown and have been to many amazing places and local gems!	Great food at great prices.	Superior restaurant, the only place I will have the dim sum.	The best restaurant around here.	My preferred location for delicious Burgers.
Today I'm celebrating.	I prefer a more festive place.	I went here to celebrate my birthday.	We celebrated our 22nd anniversary.	I was taken here to celebrate my birthday.	This is the perfect place to celebrate an important day.	If you're looking for somewhere memorable to celebrate a special occasion, I absolutely recommend this place.	elegant, upscale and classy place for a special occasion.
This stuff doesn't look fresh.	I prefer a fresher place.	On the pricier side and decently fresh.	Very cheesy, very fresh!	Fresh!	One of my preferred places for tasty Quality Meals.	Superior restaurant, the only place I will have the dim sum.	The best restaurant around here.
Burgers and fries are too heavy.	I prefer a light meal.	Good price on the burgers, sodas are a bit too much.	Cheeseburgers were good, fries were wimpy.	Good fries good meat.	One of the bests meals	I always order tacos and rice.	Great for lunch.
This place is overpriced.	I prefer a more affordable place.	Great place & service at reasonable prices.	Great food at a reasonable price.	Quality food at a more than reasonable price.	Spendy and could be a more relaxed atmosphere.	A nice place to splurge on.	Great place for quality meals.
It looks too casual.	I prefer a fancier place.	Very cheesy, very fresh!	Very kid friendly.	Awesome ambiance!	elegant, upscale and classy place for a special occasion.	The best restaurant around here.	Superior restaurant, the only place I will have the dim sum.
It looks so artificial.	I prefer a more rustic place.	Absolutely breathtaking.	Awesome ambiance!	The ambiance is wonderful.	elegant, upscale and classy place for a special occasion.	A great place for a meal or just cocktails and a view.	Like a restaurant in Washington I liked.
It looks too dark.	I prefer more light.	I always appreciate good lighting.	I like the patio outside with the lighting	Lovely atmosphere and great lighting.	I always appreciate good lighting.	I preferred the red but both were quite good.	I like the patio outside with the lighting
I've never had the stomach for vegan cuisine.	I prefer meat and fish.	I'm vegan for health reasons.	Well prepared and delicious Indian food (I ate vegetarian food).	The Impossible Burger is the best vegetarian burger I have ever had.	delicious steaks and seafood...	My favorite selections are the Steak Tartare and the Lamb Chops.	I only eat Beef Brisket here because is delicious!
I'm not a fan of rice.	I prefer pasta or potatoes.	Rice in the rice pudding is so hard.	I found that I do not enjoy tuna, but my mom thought it was excellent.	Chinese food here - super tasty.	My favorite dish is the Pappardelle Pasta with the tomato basil sauce.	Mashed potatoes were good.	Fresh salad, I love bread and delicious pot pie.
I'm more of a sweet person.	I prefer a place that serves sweets.	A very good people person.	We enjoy to go out.	BOY am I grateful for it.	Food, service and ambiance are great!	I love going here and getting take out or just a delicious slice of cheese cake.	A great place for happy hour and lunch.
I'm craving something sweeter.	I prefer something sweeter.	it's so tasty.	So delicious!	my favorite treat.	both delish	my favorite treat.	Very creamy and soft, yummy!
Sushi is nasty.	I prefer cooked food.	Sushi quality is high and real, fresh fish.	It may have literally been the best sushi I have ever had.	Chinese food here - super tasty.	I only eat Beef Brisket here because is delicious!	Food was cooked well with fresh ingredients.	Steaks were cooked perfect to our liking.
I can't afford fine dining.	I prefer a more affordable place.	a little pricey with some dishes better than others.	In recent memory, I can truly say I have not had a better dining experience.	I am just thankful that I didn't have to pay for this meal.	Spendy and could be a more relaxed atmosphere.	A nice place to splurge on.	Great place for quality meals.
I'm not a fan of Chinese food.	I prefer Japanese food.	Chinese food here - super tasty.	Chinese food... excellent.	Relative to Chinese food, it's fantastic.	Chinese food here - super tasty.	Chinese food... excellent.	Relative to Chinese food, it's fantastic.
I'm trying to be better with my money.	I prefer a more affordable place.	A nice place to splurge on.	Good value for money.	it's good value for your money	Spendy and could be a more relaxed atmosphere.	A nice place to splurge on.	Great place for quality meals.
I'm not bothered by fashion places.	I prefer a more classic place.	We enjoy to go out.	Comfortable dining environment.	Fabulous place!	Overall a great place for a date or a family dinner.	elegant, upscale and classy place for a special occasion.	The best restaurant around here.
Their dishes look over-seasoned.	I prefer food that is more natural.	a little pricey with some dishes better than others.	" This is elegant gourmet Chinese cooking that the Peninsula Hotel can be proud of.	Top notch fine dining at its best!	Food is always great...lot of variety in veg and non	Food is absolutely delicious and there are so many choices!	Food is so good and feels like I'm eating healthy even of
I'm not in the mood for ramen.	I prefer a more fancy restaurant.	Delicious homemade pasta.	I was to full to have dessert!	Pasta and sauce really exceed my expectations for the Price!	Superior restaurant, the only place I will have the dim sum.	The best restaurant around here.	Very good upscale restaurant.
Italian food doesn't appeal to me.	I prefer Thai or Indian food.	It was by far my favorite Italian cuisine compared to the other three	It was one of my favorite Italian dishes I‚Äôve ever tried.	The best Italian food I've had in Chicago, so far.	Chinese food here - super tasty.	I love love love Indian food and have tested plenty of restaurants.	Chinese food... excellent.
I'm trying to lose weight.	I prefer lighter food.	Food is so good and feels like I'm eating healthy even of	I was to full to have dessert!	Good food for being fast food	I always order tacos and rice.	Great for lunch.	Also crispy outside, soft inside.
Meat disgusts me.	I prefer fish, chicken or vegetables.	I'm vegan for health reasons.	I only eat Beef Brisket here because is delicious!	good meat!	My favorite dish is the Pappardelle Pasta with the tomato basil sauce.	Lamb and beef plate is great, I get that with hummus veggies and rice.	Food is always great...lot of variety in veg and non
I could use a nice cold beer to pair with my meal.	I prefer a place that has beer on the menu.	I had two IPAs, a PB&j sour and a stout with maple and coffee.	I had the steak and eggs with a dark and stormy since I love rum.	Excellent drinks , just okay food.	The beers on tap are all excellent.	The bar staff is great with a good liquor selection.	Amazing selection of beer on tap.
American style food is very greasy.	I prefer lighter food.	Everything in the buffet is always high quality, has great flavor and a good amount of heat.	Quality food at a more than reasonable price.	Excellent portions, fresh ingredients and a solid mainstream selection of things to taste.	I always order tacos and rice.	Great for lunch.	Also crispy outside, soft inside.
Trendy places don't stay interesting for long.	I prefer classic places.	Always stay downtown and have been to many amazing places and local gems!	elegant, upscale and classy place for a special occasion.	Great place to relax and have a bite to eat and get away from the loudness of the city.	Superior restaurant, the only place I will have the dim sum.	The best restaurant around here.	My preferred location for delicious Burgers.
Burger and fries are not my favorite.	I prefer a salad.	The fries are the best I have ever had.	The Fries were nice because they were standard and had no unique flavor, but decent fries!	Fries make every sandwich and wrap taste 100x better!	Fresh salad, I love bread and delicious pot pie.	Best salad I've ever had.	My favorite dish is the Pappardelle Pasta with the tomato basil sauce.
I only rarely order desserts	I prefer savory food.	Generous portions, especially the desserts.	I was to full to have dessert!	I order medium well.	Super thick and creamy and delectable.	Fresh salad, I love bread and delicious pot pie.	Very creamy and soft, yummy!
I ate a lot yesterday so I'd like to eat lighter today.	I prefer a more light restaurant.	I finished half of it for lunch and then have for dinner.	Well prepared and delicious Indian food (I ate vegetarian food).	Food is so good and feels like I'm eating healthy even of	Superior restaurant, the only place I will have the dim sum.	A great place for happy hour and lunch.	The best restaurant around here.
I've had my fair share of pizza already.	I prefer something more original.	Pizza was delicious...	We ordered deep dish pizza and it was the best crust!!	We enjoyed the deep dish pizza, it is delicious.	Nothing else quite like it.	like I'd like.	it has a good feel to it.
Today is not a drinking day.	I prefer non-alcoholic cocktails.	This is the perfect place to celebrate an important day.	Drinks are all well done.	Had appetizers and a bottle of wine, perfect way to end the day.	Drinks are all well done.	Delicious but also more of a brunch type of drink.	Great drinks.
I have got a spending budget.	I prefer a place that fits in my budget.	A nice place to splurge on.	Be prepared to spend a pretty penny.	I comes with a particular price tag ...	A nice place to splurge on.	Pricey but better than other options.	It is a high end place that is family friendly.
My budget isn't very high.	I prefer a cheaper place.	Pricey, yes, but	Pricey but better than other options.	A nice place to splurge on.	A nice place to splurge on.	Great place & service at reasonable prices.	Pricey but better than other options.
The fish doesn't look appetizing.	I prefer meat.	The scallops are terrific.	The shrimp tasted so fresh!!	The salmon is amazing!	good meat!	I only eat Beef Brisket here because is delicious!	I'm vegan for health reasons.
That seems super greasy.	I prefer lighter food.	BUT I BET IT IS VERY GOOD.	Very cheesy, very fresh!	Yumm!	I always order tacos and rice.	Great for lunch.	Also crispy outside, soft inside.
I can never eat that much.	I prefer a more reasonable amount.	I could have eaten it all night.	Food is so good and feels like I'm eating healthy even of	I was to full to have dessert!	($17)	I comes with a particular price tag ...	, it is a much better value.
Let's not drink if possible.	I prefer not to drink.	Drinks are all well done.	We enjoy to go out.	Drinks were tasty.	Drinks are all well done.	Excellent drinks , just okay food.	Drinks were tasty.
It's covered in grease.	I prefer cleaner food.	Also crispy outside, soft inside.	Super thick and creamy and delectable.	So thin and delicious, it was like it was filled with air!	Quality Meals, mmm, my favorite treat.	Food:	Delicious food!
I'm too hungry for a salad.	I prefer a more substantial meal.	Amazing salad.	Best salad I've ever had.	What I ordered: A large Caesar salad and a large bowl of tomato soup.	Large enough for two meals!	Quality Meals, mmm, my favorite treat.	But it was plenty to satisfy a craving for grilled meats, and I would come back if the dinner prices were a little cheaper.
I'm a fan of lighter food.	I prefer a place that serves lighter food.	I love the food best gyro, kitchen rotisserie is my best and with a spinach salad on the side yummyy :)	In good weather, I particularly enjoy the outdoor dining.	I love snacking here.	Superior restaurant, the only place I will have the dim sum.	Food is good, open late and a drive thru !!	Food, service and ambiance are great!
I love eating and talking.	I prefer a place where it's easy to have a conversation.	We come here with friends always when we feel like eating something gorgeous!	Food is so good and feels like I'm eating healthy even of	Food is soo delicious.	Excellent spot to spend time alone or talk business.	Great place to meet and catch up with friends.	A few steps from the busy street and a very fresh and relaxing place to talk and unwind.
Fine dining is not my preference.	I prefer casual dining.	In recent memory, I can truly say I have not had a better dining experience.	The place is extremely crowded and noisy - not a place for a romantic dinner :))	Very comfortable dining experience.	Very comfortable dining experience.	In good weather, I particularly enjoy the outdoor dining.	In recent memory, I can truly say I have not had a better dining experience.
It looks poorly plated.	I prefer a more fancy place.	Very nice dark wood and brass old feel.	the prices are well within reason for the quality.	The prices are well within reason for the quality.	elegant, upscale and classy place for a special occasion.	Nice place for a date night.	A great place for a meal or just cocktails and a view.
It seems too fancy.	I prefer a more casual place.	Nothing else quite like it.	it has a good feel to it.	other than that, it's good.	This is a great place for friends or a cute date night.	Great place to meet and catch up with friends.	Overall a great place for a date or a family dinner.
That's way too expensive.	I prefer a more affordable place.	However , the price is relatively high .	Pricey, yes, but	Pricey but better than other options.	Spendy and could be a more relaxed atmosphere.	A nice place to splurge on.	Great place for quality meals.
I'm not into eating fast food.	I prefer a more upscale place.	Good food for being fast food	Food is good, open late and a drive thru !!	It's mainly a drive thru.	Superior restaurant, the only place I will have the dim sum.	Great place for quality meals.	Very good upscale restaurant.
I have a couple of step children with me.	I prefer a place with activities for the kids.	Came here yesterday with my family at around 9.	My family and I went here today for my daughters	Family oriented.	It's a nice place to go during the day with your children.	I bring almost all my friends visiting to this place.	Its a fun place to start your weekend partying.
That's not good for a date.	I prefer a more romantic place.	Best for dates.	Nice place for a date night.	It could be better.	Nice place for a date night.	Overall a great place for a date or a family dinner.	This is a great place for friends or a cute date night.
I have time for a sit-down meal.	I prefer a more relaxed place.	I will order here over and over again!!!	Came for lunch over a weekend.	I was to full to have dessert!	Very nice place to relax have a cocktail and apitizers.	Excellent spot to spend time alone or talk business.	üòãüòã Good cozy place with decent food and drinks
I eat meat occasionally.	I prefer vegetarian cuisine.	I'm vegan for health reasons.	I only eat Beef Brisket here because is delicious!	Well prepared and delicious Indian food (I ate vegetarian food).	I'm vegan for health reasons.	I only eat Beef Brisket here because is delicious!	Well prepared and delicious Indian food (I ate vegetarian food).
I like being able to have a conversation over dinner.	I prefer a place that is quieter.	We enjoy to go out.	Dining experience was great.	In fact all four of us enjoyed each of our varying meals.	Great place to relax and have a bite to eat and get away from the loudness of the city.	Good ambiance.	The place has a nice atmosphere.
I'm not willing to deal with rude staff.	I prefer to go to a more friendly place.	Friendly and accommodating staff.	First of all, staff is very pleasant and courteous.	but overall the workers were on it and doing their best to be prompt and courteous to me as well as the other waiting customers.	We enjoy to go out.	I bring almost all my friends visiting to this place.	Great place to meet and catch up with friends.
My wife is very picky with ambience.	I prefer a more elegant place.	Valentines Day Date night with the wife.	Had a great time with my gf enjoying everything on the menu .	Lovely ambience.	Very elegant and accessible place.	elegant, upscale and classy place for a special occasion.	Very well kept and convenient place.
My mother had to bribe me to eat vegetables as a kid.	I prefer meat.	Took my daughter for a birthday lunch.	My mom had a tapioca pudding with fruit for dessert with a raspberry sauce that knocked my socks off.	I am just thankful that I didn't have to pay for this meal.	good meat!	I only eat Beef Brisket here because is delicious!	I'm vegan for health reasons.
I'm not a big fan of tuna.	I prefer salmon.	I found that I do not enjoy tuna, but my mom thought it was excellent.	Everything delicious with an exception of the shrimps.	We started with the tuna tataki and it was so good.	Great steak and salmon.	Best thing was actually the salmon with capers.	delicious steaks and seafood...
I've never heard of Vietnamese cuisine.	I prefer more popular cuisines.	Chinese food here - super tasty.	Chinese food... excellent.	Relative to Chinese food, it's fantastic.	It was by far my favorite Italian cuisine compared to the other three	Food is absolutely delicious and there are so many choices!	Delicious and a wide variety of dishes.
I gave up meat.	I prefer vegan food.	I'm vegan for health reasons.	Steak was delicious.	Pork ribs didn't have much meat.	I'm vegan for health reasons.	Such a great selection of vegetarian & vegan options too!	I only eat Beef Brisket here because is delicious!
I'd rather have something with dairy.	I prefer fresh cheese, butter, cream.	There vanilla milkshake is just the best.	Delicious but also more of a brunch type of drink.	For instance, they could use a few more vegetarian options.	then again, I love cheese.	Super thick and creamy and delectable.	Very creamy and soft, yummy!
I don't think the kids would enjoy.	I prefer a place where my kids would enjoy.	Great for the kids.	Very kid friendly.	It's a nice place to go during the day with your children.	It's a nice place to go during the day with your children.	My family and I went here today for my daughters	I bring almost all my friends visiting to this place.
The place is too crowded.	I prefer a more cozy and intimate place.	Crowded.	I think, at the weekend this place will be crowded and too noisy.	I left here feeling so full	The place was very comfy and cozy.	I wish we could enjoy the beautiful room inside as well.	And secondly the Lounge, where you can just a get a drink and enjoy the view.
Most fancy restaurants are overrated.	I prefer cheaper places.	Great food but service can be better.	But menu is just beautiful and food is great too.	Very good upscale restaurant.	Great place & service at reasonable prices.	A nice place to splurge on.	Quality food at a more than reasonable price.
I could go for a salad.	I prefer a more healthy option.	Fresh salad, I love bread and delicious pot pie.	Best salad I've ever had.	What I ordered: A large Caesar salad and a large bowl of tomato soup.	both delish	Great for lunch.	All you can eat, all delicious.
I can't eat lobster or prawns.	I prefer chicken or beef.	Everything delicious with an exception of the shrimps.	South African Lobster is the best around!	Calamari is just good for liquor snacks, but it's too much to share with the family.	I only eat Beef Brisket here because is delicious!	Chicken flautas are always delish.	Chicken moist and tender.
I need something less expensive and more appropriate for kids.	I prefer something cheaper and more fun for kids.	Good food for cheap.	Pricey but better than other options.	A nice place to splurge on.	Great for the kids.	Expensive and worth every penny.	It's a nice place to go during the day with your children.
I thought it was greasy.	I prefer a more healthy place.	the sauce that came with it had great flavor.	So thin and delicious, it was like it was filled with air!	Chicken moist and tender.	One of my preferred places for tasty Quality Meals.	Great place for quality meals.	OUTSIDE OF THIS SMALL PLACE IS A GOOD AREA TO EAT....
I prefer hot sauce on the side.	I prefer my food without hot sauce.	Spicy chix sandwich is the best.	Great option of sauces always does it for me.	Fries make every sandwich and wrap taste 100x better!	Great option of sauces always does it for me.	Spicy chix sandwich is the best.	Sauce was well flavoured, cheese stringy and toppings fresh.
It has a freaking band.	I prefer a more quiet place.	It has an awesome atmosphere.	it has an awesome atmosphere.	It has a great atmosphere.	Excellent spot to spend time alone or talk business.	Good ambiance.	Great place to be at night.
This place is no fun.	I prefer a fun place.	I love this place!!	I love this place.	I love this place...	and I love this place.	I love this place!!	I love this place.
I'm not in the mood for Japanese food.	I prefer Italian food.	Chinese food... excellent.	Chinese food here - super tasty.	It may have literally been the best sushi I have ever had.	It was by far my favorite Italian cuisine compared to the other three	Greek food, mmm, awesome.	Best Italian food!
That's too unimaginative.	I prefer more creative food.	Bit of a tourist-trap though.	other than that, it's good.	It could be better.	Quality Meals, mmm, my favorite treat.	One of the bests meals	Food is absolutely delicious and there are so many choices!
Not vegetarian.	I prefer vegetarian.	I'm vegan for health reasons.	Vegan friendly as we are on a newly recent vegan transition.	Well prepared and delicious Indian food (I ate vegetarian food).	I'm vegan for health reasons.	I only eat Beef Brisket here because is delicious!	Vegan friendly as we are on a newly recent vegan transition.
I'm trying to eat more tofu instead.	I prefer vegetarian cuisine.	I'm vegan for health reasons.	Well prepared and delicious Indian food (I ate vegetarian food).	Crispy tofu was delicious and perfectly lightly fried.	I'm vegan for health reasons.	I only eat Beef Brisket here because is delicious!	Well prepared and delicious Indian food (I ate vegetarian food).
I wouldn't eat anything raw or undercooked.	I prefer cooked food only (no sushi or sashimi).	Steak was seasoned just the way I like it and a perfect medium rare to rare like requested.	Pork ribs didn't have much meat.	I only eat Beef Brisket here because is delicious!	Everything delicious with an exception of the shrimps.	Sushi quality is high and real, fresh fish.	Chinese food here - super tasty.
It doesn't have a view.	I prefer a good view.	Still were able to see the views.	View is the best in the city.	It's got a nice view of the city and an open kitchen.	the best view!!!	Nothing beats the view.	View is the best in the city.
I think I'll skip the vegetables for today.	I prefer a restaurant that serves only meat.	I could have eaten it all night.	I was to full to have dessert!	Amazing salad.	but it is fine dining Very good restaurants for meat lovers, you can choose from all kinds of steaks.	Food is good, open late and a drive thru !!	Really nice restaurant if you want to eat some excellent meats.
Anything slow-cooked or grilled is delicious.	I prefer beef, chicken, lamb, pork, etc.	Tomato bisque and grilled cheese were excellent too.	Steak tartar is absolutely amazing!	Our fav is the hash brown skillet with chorizo added.	I only eat Beef Brisket here because is delicious!	My favorite selections are the Steak Tartare and the Lamb Chops.	Chicken, lamb, pork and so many cuts of beef that you will easily find the one you love.
I don't like family style restaurants.	I prefer a place where I can remain undisturbed.	I just love their food.	In recent memory, I can truly say I have not had a better dining experience.	I love this restaurant!	Very well kept and convenient place.	Great place to be at night.	I will be coming for as long as I'm alive.
Supporting small business makes me happier.	I prefer a small business over a corporate place.	I LOVE THE CUSTOMER SERVICE....	I just love their food.	Excellent Customer Service.	This is a great place to a business or special moment dinner.	I‚Äôve been a customer for 8 years now, good food for decent prices.	All in all, ambiance, food and customer service is one of a kind!
I don't enjoy eating indoors.	I prefer eating on the patio.	Comfortable dining environment.	Very comfortable dining experience.	In recent memory, I can truly say I have not had a better dining experience.	In good weather, I particularly enjoy the outdoor dining.	Love eating here!	I also enjoy going to the Spa Before Dinner.
I don't like a quiet meal.	I prefer a louder place.	Restaurant was loud.	In recent memory, I can truly say I have not had a better dining experience.	Very comfortable dining experience.	Good ambiance.	This place has a great atmosphere.	The place has a nice atmosphere.
I can't eat dairy.	I prefer a place that is lactose-free.	I'm vegan for health reasons.	then again, I love cheese.	I was to full to have dessert!	Always a good place to take tourists/friends visiting from out of town	Everything about the place is excellent/outstanding.	I recommend this place with pleasure.
Spices don't agree with me.	I prefer a more mild dish.	Seasoning was light to let the fresh ingredients shine.	But I‚Äôm not a BBQ aficionado	Everything delicious with an exception of the shrimps.	One of the bests meals	both delish	Great balance between cheese, sauce and toppings.
I'd prefer something a little less casual.	I prefer a more upscale place.	like I'd like.	Nothing else quite like it.	Best for dates.	Superior restaurant, the only place I will have the dim sum.	Great place for quality meals.	Very good upscale restaurant.
The menu is too expensive.	I prefer a more affordable place.	Quality food at a more than reasonable price.	Great food at a reasonable price.	a little pricey with some dishes better than others.	Spendy and could be a more relaxed atmosphere.	A nice place to splurge on.	Great place for quality meals.
I'm not interested in fish.	I prefer chicken.	But I‚Äôm not a BBQ aficionado	I'm vegan for health reasons.	The fish was so fresh and	Chicken flautas are always delish.	Best Chicken	Chicken moist and tender.
I don't like food that's already made.	I prefer freshly made food.	But I‚Äôm not a BBQ aficionado	I'm vegan for health reasons.	Food is absolutely delicious and there are so many choices!	But freshly made anything is worth the wait!!!	Quality Meals, mmm, my favorite treat.	I also enjoy going to the Spa Before Dinner.
If there was a falafel I'd be down with it.	I prefer the falafel.	They even made us fresh falafels which were super delish.	$7.99 for a 4 big pieces of falafel, fresh pita, hummos and salad is a great deal.	The lamb burgers are huge and yummy and served with tzatziki.	Spicy chix sandwich is the best.	Our fav is the hash brown skillet with chorizo added.	lamb gyro all the way.
They don't serve alcohol.	I prefer a place where I can drink alcohol.	The bar staff is great with a good liquor selection.	They have a nice drink and wine selection to go with your meal.	This is a 4 star place for American food which also serves alcohol.	üòãüòã Good cozy place with decent food and drinks	The bar staff is great with a good liquor selection.	And secondly the Lounge, where you can just a get a drink and enjoy the view.
I'll eat just about any kind of Asian food.	I prefer Japanese, Korean, or Thai food.	Chinese food here - super tasty.	I love love love Indian food and have tested plenty of restaurants.	Everything delicious with an exception of the shrimps.	Chinese food here - super tasty.	Chinese food... excellent.	Relative to Chinese food, it's fantastic.
I'm not a fan of chicken wings.	I prefer other appetizers.	Best wings... love the flavor (T. Lime Wings)...	I love the chicken tacos!	Chicken flautas are always delish.	All the sides are delicious and large enough to share.	Appetizers were also delicious!	I always get the chicken flautas entree, garlic shrimp tacos and the cheese
I don't enjoy fancy dishes.	I prefer a more casual restaurant.	a little pricey with some dishes better than others.	Delicious and a wide variety of dishes.	In recent memory, I can truly say I have not had a better dining experience.	Superior restaurant, the only place I will have the dim sum.	The best restaurant around here.	Very good upscale restaurant.
I had a big meal earlier.	I prefer a lighter meal.	I was to full to have dessert!	I could have eaten it all night.	Came for lunch over a weekend.	Great for lunch.	I always order tacos and rice.	One of the bests meals
I don't mind expensive as long as you get a lot for your money.	I prefer more value for my money.	Yes, prices are a little bit high, but let's be honest, worth it!	Expensive but worth it for what you're getting.	Prices are high but you get quality in return.	it's good value for your money	, it is a much better value.	Expensive and worth every penny.
I don't think the kids would enjoy because it's so loud.	I prefer a more quiet place.	It can seem a bit stuffy when you are young but when you're an old timer like me just wanting to get away from the kids for a night, you appreciate the dimly lit rooms, quiet music, and non crowds.	I think, at the weekend this place will be crowded and too noisy.	Great for the kids.	Excellent spot to spend time alone or talk business.	Good ambiance.	Great place to be at night.
Waiting in line is boring.	I prefer to book a table.	We had to wait 30+ minutes for the food and	Lines can be crazy long at noon.	Sometimes the wait is a bit long.	On making the reservation I just asked for a nice table to mark the occasion.	Book through open table!	Plenty of space to grab a table and have lunch with friends/colleagues.
Fast food makes me sick.	I prefer healthier food.	Good food for being fast food	Good price on the burgers, sodas are a bit too much.	Food is so good and feels like I'm eating healthy even of	Food is so good and feels like I'm eating healthy even of	I'm vegan for health reasons.	Food is soo delicious.
I'm not a fan of American style cuisine.	I prefer Mediterranean cuisine, Asian cuisine, Mexican cuisine or Italian cuisine.	I grew up on the east coast eating a lot of good Italian food both in restaurants and homemade by family.	But I‚Äôm not a BBQ aficionado	It was by far my favorite Italian cuisine compared to the other three	I grew up on the east coast eating a lot of good Italian food both in restaurants and homemade by family.	It was by far my favorite Italian cuisine compared to the other three	Always amazing, high quality and real Mexican cuisine.
I haven't had red meat in 30 years.	I prefer chicken.	Pork ribs didn't have much meat.	But I‚Äôm not a BBQ aficionado	I only eat Beef Brisket here because is delicious!	Chicken flautas are always delish.	Best Chicken	Chicken moist and tender.
It doesn't look kid-friendly.	I prefer a place that is kid friendly.	Very kid friendly.	Great for the kids.	It's so different than what I remembered years ago!	It's a nice place to go during the day with your children.	Overall a great place for a date or a family dinner.	This is a great place for friends or a cute date night.
Raw food is bad for my stomach.	I prefer cooked food.	I'm vegan for health reasons.	Food is so good and feels like I'm eating healthy even of	Food is always great...lot of variety in veg and non	I only eat Beef Brisket here because is delicious!	Food was cooked well with fresh ingredients.	Steaks were cooked perfect to our liking.
I'm not a big fan of steakhouses.	I prefer Italian cuisine.	But I‚Äôm not a BBQ aficionado	I only eat Beef Brisket here because is delicious!	One of the best steakhouses I have been to!	It was by far my favorite Italian cuisine compared to the other three	It was one of my favorite Italian dishes I‚Äôve ever tried.	Best Italian food!
I always feel good about plant based.	I prefer plant based cuisine.	I always appreciate good lighting.	Well balanced, delicious, fresh.	Indian Garden is a place I can see myself come back time after time again.	Food is always great...lot of variety in veg and non	Indian Garden is one of my favorite restaurants.	We started with the Cast Iron Mediterranean Mussels, tasty with garlic and herbs.
I don't like curry.	I prefer Italian or Chinese.	I only eat Beef Brisket here because is delicious!	I'm vegan for health reasons.	I love love love Indian food and have tested plenty of restaurants.	It was by far my favorite Italian cuisine compared to the other three	Chinese food here - super tasty.	My favorite dish is the Pappardelle Pasta with the tomato basil sauce.
I'm in the mood for pizza.	I prefer a more Italian cuisine.	Delicious DISH PIZZA!	Pizza came out warm.	Pizza was delicious...	It was by far my favorite Italian cuisine compared to the other three	Best Italian food!	The best Italian food I've had in Chicago, so far.
I have a low tolerance for spicy food.	I prefer milder food.	I always order tacos and rice.	a super burrito - asada was tender, salsas were good, rice was fluffy and flavorful (would prefer no rice at all, but it seems to be the standard).	I always get the chicken flautas entree, garlic shrimp tacos and the cheese	Food is always great...lot of variety in veg and non	Everything was fresh and flavorful .	Delicious and a wide variety of dishes.
I don't feel like eating rabbit food.	I prefer a more filling meal.	I'm vegan for health reasons.	I could have eaten it all night.	Pork ribs didn't have much meat.	All the sides are delicious and large enough to share.	One of the bests meals	Quality Meals, mmm, my favorite treat.
I'm not a fine dining type of person.	I prefer a more casual place.	In recent memory, I can truly say I have not had a better dining experience.	I was to full to have dessert!	Very comfortable dining experience.	This is a great place for friends or a cute date night.	Great place to meet and catch up with friends.	Overall a great place for a date or a family dinner.
I like a place with a good buzz.	I prefer a place with a lively and social vibe.	Very nice place to relax have a cocktail and apitizers.	The place has a nice atmosphere.	The place has an awesome atmosphere.	üòãüòã Good cozy place with decent food and drinks	Pleasant outdoor dining good food good service Good place with a calm atmosphere.	It's a lovely place with outdoor seating.
I'm taking someone on a date.	I prefer a more romantic place.	Valentines Day Date night with the wife.	We celebrate our first date as our anniversary.	Best for dates.	Nice place for a date night.	Overall a great place for a date or a family dinner.	This is a great place for friends or a cute date night.
I don't have the time to hang around.	I prefer a place that I can get in and out quickly.	We enjoy to go out.	but I try to go as often as I can.	I would be here often.	Always a good place to take tourists/friends visiting from out of town	It's a good place to eat, has a drive thru	Well, on this occasion I reserved a night just to wait and get there and
I would only eat snails if I were forced.	I prefer more common food.	Everything delicious with an exception of the shrimps.	Calamari were surprisingly good for a pizza place.	Calamari is just good for liquor snacks, but it's too much to share with the family.	Food is absolutely delicious and there are so many choices!	Food is always great...lot of variety in veg and non	Quality Meals, mmm, my favorite treat.
That's too upscale for me.	I prefer a more casual place.	Pricey but better than other options.	Very upscale, but tasty in a way that you'll appreciate.	Pricey, yes, but	This is a great place for friends or a cute date night.	Great place to meet and catch up with friends.	Overall a great place for a date or a family dinner.
It's a little too spicy for me.	I prefer a milder food.	Tasted awesome, the sauce was quite heavy, would have been good with a lighter lemony sauce.	Some bites were good, the sauce had a nice flavor, but the ribs overall were far too dry.	The mutton curry was a little spicy though but I liked it.	I order medium well.	Delicious and a wide variety of dishes.	Everything was fresh and flavorful .
I prefer more vegetarian options.	I prefer that the menu has more options for vegetarians.	For instance, they could use a few more vegetarian options.	Such a great selection of vegetarian & vegan options too!	Had good vegetarian options as well.	Such a great selection of vegetarian & vegan options too!	For instance, they could use a few more vegetarian options.	Large selection of vegetarian and non-vegetarian meals.
I can't stand anything spicy.	I prefer mild cuisine.	Fish tacos are so good, sauce is very hot	Spicy chix sandwich is the best.	the sauce that came with it had great flavor.	Delicious and a wide variety of dishes.	It was by far my favorite Italian cuisine compared to the other three	My favorite dish is the Pappardelle Pasta with the tomato basil sauce.
That's too much fried stuff.	I prefer lighter food.	you want it more Cooked.	All in all a great meal.	Once again a perfect meal.	I always order tacos and rice.	Great for lunch.	Also crispy outside, soft inside.
I don't like burgers.	I prefer a more fancy place.	I absolutely love M burger.	I'm vegan for health reasons.	I ordered cheeseburgers and their delicious fries!	elegant, upscale and classy place for a special occasion.	Nice place for a date night.	A great place for a meal or just cocktails and a view.
Spicy food gives me heartburn.	I prefer non-spicy food.	Fish tacos are so good, sauce is very hot	Food is so good and feels like I'm eating healthy even of	I always get the chicken flautas entree, garlic shrimp tacos and the cheese	All you can eat, all delicious.	Delicious food!	Delicious food.
Mexican food doesn't excite me.	I prefer Italian or Asian food.	brazilian food, so fresh.	One of the only taqueria's in San Jose that I love good tortillas!	Always amazing, high quality and real Mexican cuisine.	It was by far my favorite Italian cuisine compared to the other three	Chinese food here - super tasty.	I grew up on the east coast eating a lot of good Italian food both in restaurants and homemade by family.
I never really dine at restaurant chains.	I prefer a more unique place.	Have been in the restaurant twice.	In recent memory, I can truly say I have not had a better dining experience.	I guess I didn't really go into the restaurant a few years ago, just the bar area for happy hour.	Very elegant and accessible place.	elegant, upscale and classy place for a special occasion.	Very well kept and convenient place.
I gave up sugar last year.	I prefer a place that doesn't serve dessert.	Food is so good and feels like I'm eating healthy even of	I was to full to have dessert!	Desserts were so yumm.	Superior restaurant, the only place I will have the dim sum.	I love going here and getting take out or just a delicious slice of cheese cake.	Cheesecake Factory is one of the few chain Restaurants that have held standards, quality of food, drink and service.
I'm not that much in a hurry.	I prefer to have a more relaxed meal.	Sometimes the wait is a bit long.	but it won't be my last.	The wait for it is around 40 minutes, be ready for that, but	I also enjoy going to the Spa Before Dinner.	Quality Meals, mmm, my favorite treat.	I finished half of it for lunch and then have for dinner.
I don't like beer.	I prefer wine.	Excellent drinks , just okay food.	I love coffee.	Indians just one suggestion have a very mild beer, their strong beers tend to be very bitter, u might not enjoy them	Food is good and wine is OK.	The house wine is good.	Wine by the glass is also available.
Nutrition is important to my family.	I prefer a place with healthy food.	Food is so good and feels like I'm eating healthy even of	I'm vegan for health reasons.	Food is soo delicious.	I love the food here.	Great place for quality meals.	Food is absolutely delicious and there are so many choices!
I don't eat fast food.	I prefer a more healthy place.	But I eat here once and a while staring my commute home.	I ordered cheeseburgers and their delicious fries!	I order medium well.	One of my preferred places for tasty Quality Meals.	Great place for quality meals.	OUTSIDE OF THIS SMALL PLACE IS A GOOD AREA TO EAT....
They don't seem to serve alcohol.	I prefer a place that serves alcohol.	They have a nice drink and wine selection to go with your meal.	Even a bar service with food would be welcomed.	The menu does not offer a lot of things and mostly offers steaks and chicken courses.	The bar staff is great with a good liquor selection.	Happy hour is amazing here.	Excellent drinks , just okay food.
I'm not into Asian fusion.	I prefer traditional French cuisine.	But I‚Äôm not a BBQ aficionado	Chinese food here - super tasty.	Options for indian taste were quite limited.	It was by far my favorite Italian cuisine compared to the other three	I grew up on the east coast eating a lot of good Italian food both in restaurants and homemade by family.	Delicious and a wide variety of dishes.
That's a terrible deal.	I prefer a place with a better price-quality ratio.	Yes, prices are a little bit high, but let's be honest, worth it!	, it is a much better value.	it's good value for your money	Quality over quantity and unsurpassed service.	Great place & service at reasonable prices.	Prices are high but you get quality in return.
I think the last time I went to a Thai place I was in college.	I prefer Italian food.	Hands down the best Chinese food in the country I came here with a professor and another student on the Professor's recommendation.	This is a 5 star, vegetarian-friendly, fine-dining place specialized in Chinese and Asian food which also serves alcohol.	Chinese food here - super tasty.	It was by far my favorite Italian cuisine compared to the other three	Greek food, mmm, awesome.	Best Italian food!
I've only got 30 minutes.	I prefer a place that can be reached quickly.	There was a one hour wait.	so it was only a 5-7 minute wait.	but it was less than an hour.	Just pick your direction and enjoy.	Well, on this occasion I reserved a night just to wait and get there and	This spot is the one I always prefer.
I'm saving up for a car.	I prefer a place that is more affordable.	Plan to walk around downtown for a while afterward.	I comes with a particular price tag ...	A nice place to splurge on.	Quality food at a more than reasonable price.	Very small place, but the food is great and the prices are affordable.	Pricey but better than other options.
I'm trying to save up for a new phone.	I prefer a cheaper place.	Highly recommended for those who want the best and are willing to pay the premium price.	I comes with a particular price tag ...	Good value for money.	A nice place to splurge on.	Great place & service at reasonable prices.	Pricey but better than other options.
Casual dining is not my preference.	I prefer something more fancy.	Very comfortable dining experience.	In recent memory, I can truly say I have not had a better dining experience.	Comfortable dining environment.	Nothing else quite like it.	A nice place to splurge on.	like I'd like.
Food trucks are underwhelming.	I prefer sit-down restaurants.	The Grill has solid food.	Great food but service can be better.	Good lettuce wraps Burgers could have been bigger Love the ice cream	Food, service and ambiance are great!	Superior restaurant, the only place I will have the dim sum.	Food is good, open late and a drive thru !!
I don't like buffets.	I prefer a place where I can order specific dishes.	I went for a lunch buffet and they had wide variety in the buffet menu.	In recent memory, I can truly say I have not had a better dining experience.	Love eating here!	Superior restaurant, the only place I will have the dim sum.	I go here whenever I want something Good, filling, and great price..	Great place for quality meals.
Seafood is a little stinky for my taste.	I prefer meat.	Sushi quality is high and real, fresh fish.	Everything delicious with an exception of the shrimps.	Both lobster bisque and steak were little salty for me but overall great food and nice that they were served hot!	good meat!	I only eat Beef Brisket here because is delicious!	I'm vegan for health reasons.
We can do better than pizza.	I prefer a fancier place.	The best pizza.	Pizza was delicious...	Delicious DISH PIZZA!	elegant, upscale and classy place for a special occasion.	The best restaurant around here.	Superior restaurant, the only place I will have the dim sum.
We're trying to eat on a budget.	I prefer a more affordable place.	Good food for cheap.	a little pricey with some dishes better than others.	Quality food at a more than reasonable price.	Spendy and could be a more relaxed atmosphere.	A nice place to splurge on.	Great place for quality meals.
That's horrible looking pizza.	I prefer a better looking pizza.	This is one of the best deep dish pizzas I have ever eaten.	Delicious DISH PIZZA!	We ordered deep dish pizza and it was the best crust!!	The best pizza.	Best deep dish pizza in the world.	We ordered deep dish pizza and it was the best crust!!
I'm willing to splurge.	I prefer a more expensive place.	I comes with a particular price tag ...	Pricey, yes, but	A nice place to splurge on.	Great place for quality meals.	A nice place to splurge on.	Great place & service at reasonable prices.
I am feeling fancy today.	I prefer a fancier place.	Truly a lovely evening.	It was a perfect evening.	Great way to spend the evening!	elegant, upscale and classy place for a special occasion.	The best restaurant around here.	Superior restaurant, the only place I will have the dim sum.
I don't really like red meat.	I prefer chicken or fish.	I only eat Beef Brisket here because is delicious!	But I‚Äôm not a BBQ aficionado	I'm vegan for health reasons.	delicious steaks and seafood...	Chicken flautas are always delish.	Everything delicious with an exception of the shrimps.
The food is more important than the view.	I prefer food that is cooked by a professional.	the food and the views make it well worth it.	Food is very nicely prepared and presented.	Food makes it worth it!	Steak was seasoned just the way I like it and a perfect medium rare to rare like requested.	Steaks were cooked perfect to our liking.	Meat was well seasoned and well cooked.
Jalapenos are my limit.	I prefer food without jalapenos.	Nachos are bomb	Quesadillas are the best!!!	Fish tacos are so good, sauce is very hot	Quesadillas are the best!!!	Fish tacos are so good, sauce is very hot	Nachos are bomb
I can't eat animals.	I prefer vegetarian food.	I'm vegan for health reasons.	All you can eat, all delicious.	But I‚Äôm not a BBQ aficionado	I'm vegan for health reasons.	I only eat Beef Brisket here because is delicious!	Well prepared and delicious Indian food (I ate vegetarian food).
I don't eat meat.	I prefer a vegetarian restaurant.	I'm vegan for health reasons.	I only eat Beef Brisket here because is delicious!	But I‚Äôm not a BBQ aficionado	Really nice restaurant if you want to eat some excellent meats.	Such a great selection of vegetarian & vegan options too!	but it is fine dining Very good restaurants for meat lovers, you can choose from all kinds of steaks.
It is kind of trashy.	I prefer a more upscale place.	as well I've never seen a place look so fresh but also so douchy lol.	I love it	Nice decor	Superior restaurant, the only place I will have the dim sum.	Great place for quality meals.	Very good upscale restaurant.
Hot food makes my stomach hurt.	I prefer chilled food.	Food is so good and feels like I'm eating healthy even of	Good food, a little cold outside but the heaters helped.	were truly from the smoker, and they had the feel of mostly grilled ribs to me, which I do not like.	Also crispy outside, soft inside.	In good weather, I particularly enjoy the outdoor dining.	, Thai iced I love coming here
Family style restaurants are usually lame.	I prefer a quiet place.	The service and food are always great.	Great food but service can be better.	A good selection of specials for appetizers or entrees always keeps it interesting.	Excellent spot to spend time alone or talk business.	Good ambiance.	Great place to be at night.
I have fundamental disagreements with the meat industry.	I prefer a vegan place.	I'm vegan for health reasons.	I only eat Beef Brisket here because is delicious!	good meat!	Such a great selection of vegetarian & vegan options too!	They have vegan options, fresh produce, an interesting, ever-changing menu selection, and the most fabulous Mac and Cheese.	Had good vegetarian options as well.
Beans make me fart.	I prefer meat-based dishes.	The side baked beans were delicious.	Chicken moist and tender.	I love coffee.	My favorite dish is the Pappardelle Pasta with the tomato basil sauce.	Delicious and a wide variety of dishes.	a little pricey with some dishes better than others.
I could go to a mom and pop burger place.	I prefer a more unique burger place.	A fun place to eat give plenty of fries better than McDonald's all the food	Food is good, open late and a drive thru !!	Absolutely delicious food and a drive thru option	My preferred location for delicious Burgers.	Best Burger in town.	Very good burger and fry establishment.
If it puts pineapple on the pizza I'm not going.	I prefer a place that doesn't put pineapple on the pizza.	We ordered deep dish pizza and it was the best crust!!	Key about the pizza here is to have it with extra basil leaves, spicy pepper flakes, cheese or ranch on the side.	Grilled pineapple is quite yummy.	Key about the pizza here is to have it with extra basil leaves, spicy pepper flakes, cheese or ranch on the side.	We ordered deep dish pizza and it was the best crust!!	I am picky when it comes to pizza, but this place rocked.
I don't like spending much money.	I prefer a cheap place.	Pricey, yes, but	It‚Äôs a little pricey but who cares!	Expensive and worth every penny.	A nice place to splurge on.	Great place & service at reasonable prices.	Great place for quality meals.
That's so tacky.	I prefer something classier.	Nice decor	Very nice decor.	Beautiful!	elegant, upscale and classy place for a special occasion.	Nothing else quite like it.	The cozy and fancy decoration is good for dating or business.
I have a standing date with my niece on Saturdays.	I prefer the place to be family friendly on Saturdays.	I've really enjoyed myself my niece took me to brunch after church	Took my daughter for a birthday lunch.	We celebrate our first date as our anniversary.	It's a nice place to go during the day with your children.	I recommend this place to friends and family.	Consistently good and if you want to treat some employees to a truly special evening for the holidays, this is a great place to make a good impression.
Fried stuff has way too many calories.	I prefer healthier food.	Food is so good and feels like I'm eating healthy even of	Rice in the rice pudding is so hard.	Fries make every sandwich and wrap taste 100x better!	Food is so good and feels like I'm eating healthy even of	I'm vegan for health reasons.	Food is soo delicious.
I can't afford fancy food.	I prefer cheap, affordable food.	a little pricey with some dishes better than others.	Good food for cheap.	I am just thankful that I didn't have to pay for this meal.	Quality food at a more than reasonable price.	Good food for cheap.	But it was plenty to satisfy a craving for grilled meats, and I would come back if the dinner prices were a little cheaper.
I'm allergic to shellfish.	I prefer not to eat shellfish.	I'm vegan for health reasons.	Everything delicious with an exception of the shrimps.	The shrimp tasted so fresh!!	I'm vegan for health reasons.	Everything delicious with an exception of the shrimps.	For dinner, I enjoyed the scallops one night and the sea bass the second.
It looks too fancy.	I prefer a more casual place.	it has a good feel to it.	Nothing else quite like it.	it has a great feel to it.	This is a great place for friends or a cute date night.	Great place to meet and catch up with friends.	Overall a great place for a date or a family dinner.
Fast food is pretty bad for you.	I prefer more nutritious food.	Good food for being fast food	Food is good, open late and a drive thru !!	Food is still good.	Food is so good and feels like I'm eating healthy even of	Food is soo delicious.	Quality Meals, mmm, my favorite treat.
Spicy food gives me an adrenaline rush.	I prefer mild food.	Food is so good and feels like I'm eating healthy even of	Great option of sauces always does it for me.	Fish tacos are so good, sauce is very hot	I order medium well.	Quality Meals, mmm, my favorite treat.	Everything was fresh and flavorful .
I can't handle dairy.	I prefer a lactose free place.	I'm vegan for health reasons.	then again, I love cheese.	I was to full to have dessert!	There vanilla milkshake is just the best.	The milkshakes are delicious!	then again, I love cheese.
Food trucks just feel dirty.	I prefer a clean environment.	I just love their food.	Great burgers and great chicken strips.	I like this place it has drive-thru.	Nice environment and super personal service.	I also enjoy going to the Spa Before Dinner.	In good weather, I particularly enjoy the outdoor dining.
That's not exactly fresh.	I prefer organic food.	Very cheesy, very fresh!	Fresh!	All very fresh and very good.	I'm vegan for health reasons.	Food is always great...lot of variety in veg and non	Food is so good and feels like I'm eating healthy even of
I don't really like seafood.	I prefer beef or chicken.	Everything delicious with an exception of the shrimps.	I found that I do not enjoy tuna, but my mom thought it was excellent.	Both lobster bisque and steak were little salty for me but overall great food and nice that they were served hot!	I only eat Beef Brisket here because is delicious!	Chicken flautas are always delish.	Chicken moist and tender.
I'm trying to cut out carbs.	I prefer a place with more healthy options.	Food is so good and feels like I'm eating healthy even of	I'm vegan for health reasons.	The balsamic dressing weighed the salad down and I found myself feeling full quickly.	Great place for quality meals.	One of my preferred places for tasty Quality Meals.	One of my top places for tasty quality meals.
I'm a little short on cash this month.	I prefer a cheaper place.	A nice place to splurge on.	Be prepared to spend a pretty penny.	Good value for money.	A nice place to splurge on.	Great place & service at reasonable prices.	Pricey but better than other options.
I've never tried vegan.	I prefer a place that serves meat.	I'm vegan for health reasons.	Well prepared and delicious Indian food (I ate vegetarian food).	Vegan friendly as we are on a newly recent vegan transition.	but it is fine dining Very good restaurants for meat lovers, you can choose from all kinds of steaks.	My preferred location for delicious Burgers.	Really nice restaurant if you want to eat some excellent meats.
I've never tried sushi.	I prefer a more familiar cuisine.	It may have literally been the best sushi I have ever had.	Would not be my top sashimi restaurant, but for the convenience, it was worth it.	I found that I do not enjoy tuna, but my mom thought it was excellent.	Delicious and a wide variety of dishes.	It was by far my favorite Italian cuisine compared to the other three	One of my preferred places for tasty Quality Meals.
The menu isn't very diverse.	I prefer a place with a more diverse menu.	The menu does not offer a lot of things and mostly offers steaks and chicken courses.	Wide selection of food, but not overwhelming.	Menu is simple but well done, they welcome substitutions and portion size changes.	But menu is just beautiful and food is great too.	Good menu with many things to try.	Superior restaurant, the only place I will have the dim sum.
I don't feel like going to a sit-down restaurant.	I prefer a quick meal.	I guess I didn't really go into the restaurant a few years ago, just the bar area for happy hour.	Very comfortable dining experience.	In recent memory, I can truly say I have not had a better dining experience.	One of the bests meals	Large enough for two meals!	Once again a perfect meal.
Fast food makes me feel depressed.	I prefer something healthier.	Food is so good and feels like I'm eating healthy even of	Good food for being fast food	Good price on the burgers, sodas are a bit too much.	both delish	it's so tasty.	Great for lunch.
I can't afford places with prix fix menus.	I prefer a more affordable place.	Superior restaurant, the only place I will have the dim sum.	a little pricey with some dishes better than others.	The menu does not offer a lot of things and mostly offers steaks and chicken courses.	Spendy and could be a more relaxed atmosphere.	A nice place to splurge on.	Great place for quality meals.
Foreign cuisines are not my thing.	I prefer more traditional food.	I grew up on the east coast eating a lot of good Italian food both in restaurants and homemade by family.	It was by far my favorite Italian cuisine compared to the other three	It was one of my favorite Italian dishes I‚Äôve ever tried.	Food is absolutely delicious and there are so many choices!	Delicious and a wide variety of dishes.	Food is always great...lot of variety in veg and non
I don't like many cuisines.	I prefer a specific cuisine (French, Italian, American, etc).	I'm vegan for health reasons.	Everything delicious with an exception of the shrimps.	Food is absolutely delicious and there are so many choices!	I grew up on the east coast eating a lot of good Italian food both in restaurants and homemade by family.	It was by far my favorite Italian cuisine compared to the other three	Great food with traditional Italian favorites as well as some more inventive menu items.
I'm not into French food.	I prefer Italian, Thai or Japanese food.	It was by far my favorite Italian cuisine compared to the other three	then again, I love cheese.	I grew up on the east coast eating a lot of good Italian food both in restaurants and homemade by family.	Chinese food here - super tasty.	It was by far my favorite Italian cuisine compared to the other three	Relative to Chinese food, it's fantastic.
There isn't much variety.	I prefer a larger menu.	Nothing else quite like it.	Some could be better.	other than that, it's good.	Menu is simple but well done, they welcome substitutions and portion size changes.	The menu is great.	I order medium well.
Fast food isn't my first choice.	I prefer a fancier place.	Food is good, open late and a drive thru !!	Good food for being fast food	I ordered cheeseburgers and their delicious fries!	elegant, upscale and classy place for a special occasion.	The best restaurant around here.	Superior restaurant, the only place I will have the dim sum.
A view is important.	I prefer a more scenic place.	the best view!!!	Nothing beats the view.	The views here are not to be missed!	One of my favorite places!!	But the scenic view is the best experience.	My favourite location!
I've never enjoyed eating vegetables.	I prefer meat.	I'm vegan for health reasons.	Spinach salad was delish!	Fresh salad, I love bread and delicious pot pie.	good meat!	I only eat Beef Brisket here because is delicious!	I'm vegan for health reasons.
A good Merlot makes the meal better.	I prefer wine over beer.	The house wine is good.	My French Martini was outstanding.	Love me a great Malbec and ribeye and this hit the spot!	Food is good and wine is OK.	I started with the Moscow Mule - sobieski vodka, angostura bitters, ginger beer.	Wine, caipirinha, and a desert.
Too expensive.	I prefer a more affordable place.	Pricey, yes, but	Expensive and worth every penny.	Pricey but better than other options.	Spendy and could be a more relaxed atmosphere.	A nice place to splurge on.	Great place for quality meals.
I try to keep dairy free.	I prefer dairy free food.	I'm vegan for health reasons.	then again, I love cheese.	I was to full to have dessert!	The milkshakes are delicious!	I'm vegan for health reasons.	There vanilla milkshake is just the best.
I've not eaten meat since I was a child.	I prefer vegan cuisine.	I'm vegan for health reasons.	I only eat Beef Brisket here because is delicious!	Steak was delicious.	I'm vegan for health reasons.	Well prepared and delicious Indian food (I ate vegetarian food).	Such a great selection of vegetarian & vegan options too!
It never crossed my mind to be a vegetarian.	I prefer meat.	I'm vegan for health reasons.	Vegan friendly as we are on a newly recent vegan transition.	Well prepared and delicious Indian food (I ate vegetarian food).	good meat!	I only eat Beef Brisket here because is delicious!	I'm vegan for health reasons.
I'm with a vegan friend.	I prefer a place with vegan options.	I'm vegan for health reasons.	Vegan friendly as we are on a newly recent vegan transition.	Some vegan and gluten free items.	Such a great selection of vegetarian & vegan options too!	Had good vegetarian options as well.	They have vegan options, fresh produce, an interesting, ever-changing menu selection, and the most fabulous Mac and Cheese.
I'm on a tight budget.	I prefer a place that's more affordable.	A nice place to splurge on.	I comes with a particular price tag ...	Pricey, yes, but	Very small place, but the food is great and the prices are affordable.	Quality food at a more than reasonable price.	Spendy and could be a more relaxed atmosphere.
I'm not a big meat eater.	I prefer vegetarian cuisine.	I'm vegan for health reasons.	But I‚Äôm not a BBQ aficionado	I only eat Beef Brisket here because is delicious!	I'm vegan for health reasons.	I only eat Beef Brisket here because is delicious!	Well prepared and delicious Indian food (I ate vegetarian food).
It's a little late for breakfast.	I prefer lunch or brunch.	i needed a nap!	I was to full to have dessert!	Came for lunch over a weekend.	Delicious but also more of a brunch type of drink.	Its was a great brunch.	Good for family dinner or dinner with office colleagues.
They seem to have too many people.	I prefer a more quiet place.	Crowded.	I left surprisingly full.	I left here feeling so full	Excellent spot to spend time alone or talk business.	Good ambiance.	Great place to be at night.
Experimental cuisine sounds too risky for me.	I prefer tried and tested dishes.	Everything was delicious, though I was disappointed in the veal, tough and would have been better over pasta.	Shrimp kebab was exceptional.	Options for indian taste were quite limited.	In recent memory, I can truly say I have not had a better dining experience.	a little pricey with some dishes better than others.	My favorite dish is the Pappardelle Pasta with the tomato basil sauce.
I only eat organic.	I prefer organic food.	I'm vegan for health reasons.	I only eat Beef Brisket here because is delicious!	Well prepared and delicious Indian food (I ate vegetarian food).	I'm vegan for health reasons.	Food is always great...lot of variety in veg and non	Food is so good and feels like I'm eating healthy even of
I'm not in mood for pizza.	I prefer a more sophisticated cuisine.	Delicious DISH PIZZA!	Pizza was delicious...	Pizza came out warm.	Delicious and a wide variety of dishes.	One of the bests meals	It was by far my favorite Italian cuisine compared to the other three
I'm pescatarian.	I prefer fish.	I'm vegan for health reasons.	Vegan friendly as we are on a newly recent vegan transition.	Well prepared and delicious Indian food (I ate vegetarian food).	delicious steaks and seafood...	Everything delicious with an exception of the shrimps.	For dinner, I enjoyed the scallops one night and the sea bass the second.
I'm avoiding fancy places.	I prefer a more relaxed place.	Always a good place to take tourists/friends visiting from out of town	Special occasion place.	Well, on this occasion I reserved a night just to wait and get there and	Very nice place to relax have a cocktail and apitizers.	Excellent spot to spend time alone or talk business.	üòãüòã Good cozy place with decent food and drinks
I'm with a non-vegan friend.	I prefer a place that has vegan options.	I'm vegan for health reasons.	Vegan friendly as we are on a newly recent vegan transition.	Had dinner here with a group of friends and	Such a great selection of vegetarian & vegan options too!	They have vegan options, fresh produce, an interesting, ever-changing menu selection, and the most fabulous Mac and Cheese.	Had good vegetarian options as well.
I like to stay under $20 a meal.	I prefer a more affordable place.	You definitely get your money's worth of options and food quantity!	a little pricey with some dishes better than others.	Quality food at a more than reasonable price.	Spendy and could be a more relaxed atmosphere.	A nice place to splurge on.	Great place for quality meals.
I'm not eating Bambi.	I prefer vegetarian cuisine.	I could have eaten it all night.	good meat!	Steak was delicious.	I'm vegan for health reasons.	I only eat Beef Brisket here because is delicious!	Well prepared and delicious Indian food (I ate vegetarian food).
I'm broke.	I prefer a cheaper place.	A nice place to splurge on.	Pricey, yes, but	($17)	A nice place to splurge on.	Great place & service at reasonable prices.	Pricey but better than other options.
That's junk food.	I prefer healthier food.	Food is soo delicious.	Awesome food.	Food is fantastic!	Food is so good and feels like I'm eating healthy even of	I'm vegan for health reasons.	Food is soo delicious.
Shellfish makes me itch.	I prefer a more allergy-friendly place.	Everything delicious with an exception of the shrimps.	The shrimp tasted so fresh!!	For dinner, I enjoyed the scallops one night and the sea bass the second.	Always a good place to take tourists/friends visiting from out of town	I recommend this place with pleasure.	Decent place.
I prefer kid-friendly.	I prefer a more kid-friendly place.	Very kid friendly.	TEENS AND KIDS ATLEAST	Great for the kids.	It's a nice place to go during the day with your children.	This is an affordable, kid-friendly place specialized in burgers and American food.	Overall a great place for a date or a family dinner.
Spicy food makes my tongue burn.	I prefer mild food.	Good tarter dipping sauce.	Fish tacos are so good, sauce is very hot	the sauce that came with it had great flavor.	I order medium well.	Quality Meals, mmm, my favorite treat.	Everything was fresh and flavorful .
I often spend between $50 and $75 for a meal for two.	I prefer a place that is less expensive.	The price is amazing for the quality of food you get.	But it was plenty to satisfy a craving for grilled meats, and I would come back if the dinner prices were a little cheaper.	You definitely get your money's worth of options and food quantity!	Quality food at a more than reasonable price.	Great place & service at reasonable prices.	Very small place, but the food is great and the prices are affordable.
Not a huge fan of Mexican cuisine.	I prefer Italian, French or American food.	Always amazing, high quality and real Mexican cuisine.	Best Mexican food love this place!	My fav place for Brazilian food.	I grew up on the east coast eating a lot of good Italian food both in restaurants and homemade by family.	It was by far my favorite Italian cuisine compared to the other three	Best Italian food!
The weather is too cold for that.	I prefer a warmer place.	Air is constantly on, be prepared for the cold breeze.	Just kinda settled and warm.	Very hot and just the way	Just kinda settled and warm.	In good weather, I particularly enjoy the outdoor dining.	One of my favorite places!!
I heard they had terrible service.	I prefer an attentive service.	Only because service was slow other than that everything was fine	Great food but service can be better.	Amazing service all the time .	Service is typically great.	service is awesome even when they are busy.	Friendly attentive service.
How come they only serve that much.	I prefer larger portions.	They serve fast which is very good.	This is a 4 star place for American food which also serves alcohol.	This is a 4 star Gastropub that serves American food.	Smaller portions, but very tasty	The downside was the size of the portions.	Large enough for two meals!
I'm with a business partner.	I prefer a more formal place.	I had a very productive business dinner here.	I travel for work and visit many hotels.	I also a server.	elegant, upscale and classy place for a special occasion.	Overall a great place for a date or a family dinner.	A great place for a meal or just cocktails and a view.
Most of the time I don't eat any fish or meat.	I prefer a vegetarian place.	I'm vegan for health reasons.	Everything delicious with an exception of the shrimps.	Well prepared and delicious Indian food (I ate vegetarian food).	Such a great selection of vegetarian & vegan options too!	One of my preferred places for tasty Quality Meals.	Really nice restaurant if you want to eat some excellent meats.
I don't like booth seating.	I prefer a table.	After 10ish more open seating.	Outdoor seating available.	I admire this venue a lot.	Plenty of space to grab a table and have lunch with friends/colleagues.	Book through open table!	The rest of my table also enjoyed their meals.
My coworkers and I have less than 1h.	I prefer a place that will serve us quickly.	I go twice per month as minimum.	We went as a team at work to celebrate.	We shared a medium between 4 people and still had left overs!	The service and food are always great.	It's a good place to eat, has a drive thru	The food arrives quickly and the service is just great.
I'm not in the mood for burgers.	I prefer a fancier place.	But I‚Äôm not a BBQ aficionado	I ordered cheeseburgers and their delicious fries!	I could have eaten it all night.	elegant, upscale and classy place for a special occasion.	The best restaurant around here.	Superior restaurant, the only place I will have the dim sum.
This place looks chaotic.	I prefer a more organized place.	this place has a great feel to it.	this place has a cool design.	This place is absolutely perfect.	Very well kept and convenient place.	This place is absolutely perfect.	Really like this place
I don't like fettuccini.	I prefer ravioli, spaghetti or penne.	My favorite dish is the Pappardelle Pasta with the tomato basil sauce.	It was one of my favorite Italian dishes I‚Äôve ever tried.	Quesadillas are the best!!!	My favorite dish is the Pappardelle Pasta with the tomato basil sauce.	The Ravioli is tasty with that rich creamy flavor.	I recommend spaghetti with meatballs, it was delicious and the meatballs were unique, big and good.
That's horribly cheap wine.	I prefer a more fancy wine.	wonderful wine with the generous poor..	Wine prices are erratic, with some barely above retail, and others sky high, so careful browsing is required, but will be rewarded.	Good value for the money Friendly service, great libations.	wonderful wine with the generous poor..	Wine pairing was helpfully suggested.	My French Martini was outstanding.
I hate gastropubs.	I prefer a more classy place.	I am (üíÅüèº‚Äç	Gotta love it!	but bbn	elegant, upscale and classy place for a special occasion.	Nice place for a date night.	And secondly the Lounge, where you can just a get a drink and enjoy the view.
I am not that keen on Indian vegetable dishes.	I prefer Chinese or Italian food.	Indian Garden is one of my favorite restaurants.	I love love love Indian food and have tested plenty of restaurants.	we have been going to the restaurant for many years to enjoy their excellent authentic north indian cuisine..	Chinese food here - super tasty.	It was by far my favorite Italian cuisine compared to the other three	I always order tacos and rice.
My body is a temple.	I prefer a lighter meal.	I am in heaven!	when I tell you this place was heaven.	The views unparalleled!!	Great for lunch.	I always order tacos and rice.	One of the bests meals
I'm not a fan of high-end places.	I prefer a more casual place.	Besides this, the restaurant is conveniently located near many shopping destinations, and I was very happy with the experience I had here.	Superior restaurant, the only place I will have the dim sum.	Quality food at a more than reasonable price.	This is a great place for friends or a cute date night.	Great place to meet and catch up with friends.	Overall a great place for a date or a family dinner.
I have a bigger budget than that.	I prefer more expensive cuisine.	I comes with a particular price tag ...	Pricey, yes, but	Pricey but better than other options.	Quality food at a more than reasonable price.	a little pricey with some dishes better than others.	Pasta and sauce really exceed my expectations for the Price!
Avoiding seafood is best for my health.	I prefer a place that is healthier.	Everything delicious with an exception of the shrimps.	Sushi quality is high and real, fresh fish.	delicious steaks and seafood...	One of my preferred places for tasty Quality Meals.	Great place for quality meals.	My preferred location for delicious Burgers.
I heard they have bad service.	I prefer a place with good service.	Amazing service all the time .	I always get fantastic customer service there.	Service is typically great.	Great place & service at reasonable prices.	Superior service, excellent food and drinks.	I always get awesome service here.
I'm craving some sushi.	I prefer Japanese cuisine.	It may have literally been the best sushi I have ever had.	I will definitely come back there, to try some sushi and desserts.	Had the antipasto, calamari, and caesar salad.	Chinese food here - super tasty.	Chinese food... excellent.	Relative to Chinese food, it's fantastic.
It seems too loud for me.	I prefer a more quiet place to eat.	I think, at the weekend this place will be crowded and too noisy.	The atmosphere is nice.	Lovely ambience.	Great place to relax and have a bite to eat and get away from the loudness of the city.	Food, service and ambiance are great!	I enjoyed eating here.
Indian food gives me digestion problems.	I prefer more digestible food.	Well prepared and delicious Indian food (I ate vegetarian food).	Chinese food here - super tasty.	authentic and delicious indian food.	Food is always great...lot of variety in veg and non	Food is so good and feels like I'm eating healthy even of	Food:
I'm not in the mood for carbs.	I prefer a more protein-based meal.	I'm vegan for health reasons.	I was to full to have dessert!	Food is so good and feels like I'm eating healthy even of	One of the bests meals	Once again a perfect meal.	All you can eat, all delicious.
I really need some protein right now.	I prefer a place that serves more protein.	I could have eaten it all night.	I am a huge fan of steaks, so i love coming here for my month protein.	Great for lunch.	One of my preferred places for tasty Quality Meals.	Great place for quality meals.	One of my top places for tasty quality meals.
Organic foods are boring.	I prefer a non-organic place.	Food is always great...lot of variety in veg and non	I'm vegan for health reasons.	Food is soo delicious.	My preferred location for delicious Burgers.	One of my preferred places for tasty Quality Meals.	Like a restaurant in Washington I liked.
Their menu is somewhat limited.	I prefer a more extensive menu.	The menu does not offer a lot of things and mostly offers steaks and chicken courses.	The menu is concise, the prices are high and the portions are modest, but the quality is excellent.	They serve fast which is very good.	Menu is simple but well done, they welcome substitutions and portion size changes.	The menu is great.	The menu for all on one page but had a great variety.
It's too spicy for my taste.	I prefer milder food.	the sauce that came with it had great flavor.	Tasted awesome, the sauce was quite heavy, would have been good with a lighter lemony sauce.	Some bites were good, the sauce had a nice flavor, but the ribs overall were far too dry.	Food is always great...lot of variety in veg and non	Everything was fresh and flavorful .	Delicious and a wide variety of dishes.
I am not fussed about how the ingredients are grown.	I prefer something plainer or simpler.	Everything we‚Äôve had here has been delicious and full of thoughtful ingredients.	I'm vegan for health reasons.	Food is always great...lot of variety in veg and non	Nothing else quite like it.	like I'd like.	other than that, it's good.
Garlic gives me terrible stomach cramps.	I prefer a place that doesn't use garlic.	Lamb and beef plate is great, I get that with hummus veggies and rice.	Food is so good and feels like I'm eating healthy even of	The balsamic dressing weighed the salad down and I found myself feeling full quickly.	My favorite dish is the Pappardelle Pasta with the tomato basil sauce.	Superior restaurant, the only place I will have the dim sum.	Great option of sauces always does it for me.
I have been trying to eat healthier.	I prefer a place that serves organic and/or local products.	Food is so good and feels like I'm eating healthy even of	I'm vegan for health reasons.	I was to full to have dessert!	I go here whenever I want something Good, filling, and great price..	Such a great selection of vegetarian & vegan options too!	I‚Äôve been a customer for 8 years now, good food for decent prices.
Too much gluten can make my stomach cramp.	I prefer a more gluten-free place.	Food is so good and feels like I'm eating healthy even of	I'm vegan for health reasons.	Love the food, also they have gluten free menu.	Love the food, also they have gluten free menu.	Such a great selection of vegetarian & vegan options too!	They have vegan options, fresh produce, an interesting, ever-changing menu selection, and the most fabulous Mac and Cheese.
I got sick the last time I ate raw fish.	I prefer cooked fish.	I ordered the salmon which was okay, it was cooked well	Well prepared and delicious Indian food (I ate vegetarian food).	Everything delicious with an exception of the shrimps.	delicious steaks and seafood...	For dinner, I enjoyed the scallops one night and the sea bass the second.	Everything delicious with an exception of the shrimps.
I don't feel like eating local cuisine.	I prefer a place with an international menu.	In recent memory, I can truly say I have not had a better dining experience.	But I‚Äôm not a BBQ aficionado	Love eating here!	Superior restaurant, the only place I will have the dim sum.	menu is like a cafe in boston i loved.	Excellent service ambience & cuisine!!!
I wouldn't say I like tapas.	I prefer a more formal dining experience.	Indian Garden is one of my favorite restaurants.	I really love the Greek salad here with lamb and beef meat.	It was by far my favorite Italian cuisine compared to the other three	Very comfortable dining experience.	It is a wonderful dining experience!	In recent memory, I can truly say I have not had a better dining experience.
I don't like going to high-end places.	I prefer less expensive places.	A nice place to splurge on.	Quality food at a more than reasonable price.	One of those rare finds, an upscale place with good deals.	Quality food at a more than reasonable price.	Great place & service at reasonable prices.	I go here whenever I want something Good, filling, and great price..
I'm picky with seafood.	I prefer beef, chicken or pork.	Everything delicious with an exception of the shrimps.	delicious steaks and seafood...	I selected the pasta option minus the seafood.	I only eat Beef Brisket here because is delicious!	Chicken, lamb, pork and so many cuts of beef that you will easily find the one you love.	Turkey burger and fries, both very tasty!
The dishes at the trendy places I've been to are really small.	I prefer a larger portion size.	a little pricey with some dishes better than others.	Menu is simple but well done, they welcome substitutions and portion size changes.	I went for a lunch buffet and they had wide variety in the buffet menu.	Large enough for two meals!	The downside was the size of the portions.	Smaller portions, but very tasty
That steak is overcooked.	I prefer my steak medium rare.	my meal was just as I requested, seasoned perfectly, steak cooked exactly right.	Steaks were cooked perfect to our liking.	Pork ribs didn't have much meat.	Steak was seasoned just the way I like it and a perfect medium rare to rare like requested.	I order medium well.	Steaks were cooked perfect to our liking.
I am too hungry to wait.	I prefer a place that has a faster service.	I could have eaten it all night.	I was to full to have dessert!	We had to wait 30+ minutes for the food and	The service is rapid, prices are convenient, good atmosphere.	Superior service, excellent food and drinks.	Great place & service at reasonable prices.
I'm allergic to lots of foods.	I prefer non-allergenic foods.	I'm vegan for health reasons.	Food is so good and feels like I'm eating healthy even of	Well prepared and delicious Indian food (I ate vegetarian food).	All you can eat, all delicious.	both delish	Delicious food!
I don't want to eat at a chain restaurant.	I prefer an independent restaurant.	Superior restaurant, the only place I will have the dim sum.	I guess I didn't really go into the restaurant a few years ago, just the bar area for happy hour.	In recent memory, I can truly say I have not had a better dining experience.	Superior restaurant, the only place I will have the dim sum.	Like a restaurant in Washington I liked.	Food, service and ambiance are great!
I'm not a fan of Korean food.	I prefer sushi or Italian.	Chinese food here - super tasty.	Chinese food... excellent.	Relative to Chinese food, it's fantastic.	My favorite dish is the Pappardelle Pasta with the tomato basil sauce.	It was by far my favorite Italian cuisine compared to the other three	Chinese food here - super tasty.
The food is usually cold there.	I prefer steaming hot food.	Everything in the buffet is always high quality, has great flavor and a good amount of heat.	Overall, the food is good and cooked well.	The food is fresh and delicious!	Also crispy outside, soft inside.	Fries make every sandwich and wrap taste 100x better!	Spicy chix sandwich is the best.
That's too experimental for me.	I prefer traditional dishes.	like I'd like.	other than that, it's good.	Nothing else quite like it.	Delicious and a wide variety of dishes.	My favorite dish is the Pappardelle Pasta with the tomato basil sauce.	Fresh salad, I love bread and delicious pot pie.
Portions are too large.	I prefer a place with smaller portions.	Large enough for two meals!	The downside was the size of the portions.	Good, plentiful, portions.	Smaller portions, but very tasty	Superior restaurant, the only place I will have the dim sum.	Good, plentiful, portions.
I'd rather walk the path less traveled.	I prefer a more intimate and cozy place.	Just pick your direction and enjoy.	so it was convenient enough to walk to.	but we were able to walk about to get some great views.	The place was very comfy and cozy.	Nice place for a date night.	And secondly the Lounge, where you can just a get a drink and enjoy the view.
Spicy food is flavourful but I often have a bad reaction.	I prefer mild food.	Fish tacos are so good, sauce is very hot	This being said, you can definitely take friends and family with low spice tolerance without second thoughts :)	a super burrito - asada was tender, salsas were good, rice was fluffy and flavorful (would prefer no rice at all, but it seems to be the standard).	I order medium well.	Quality Meals, mmm, my favorite treat.	Everything was fresh and flavorful .
I'm not allowed to have pasta on my diet.	I prefer a healthier dish.	Delicious homemade pasta.	I selected the pasta option minus the seafood.	You can either choose a pita, a bowl, or a salad with your choice of protein, as well as toppings.	One of the bests meals	Quality Meals, mmm, my favorite treat.	Great for lunch.
I won't eat it if it's too hot.	I prefer milder food.	I could have eaten it all night.	Pizza came out warm.	you want it more Cooked.	Food is always great...lot of variety in veg and non	Everything was fresh and flavorful .	Delicious and a wide variety of dishes.
It looks like a loud setting.	I prefer a more intimate setting.	Lovely ambience.	Lovely ambience.	Awesome ambiance!	we were there for a romantic evening and to feel pampered and	We enjoy to go out.	I also enjoy going to the Spa Before Dinner.
That steak is raw.	I prefer my steak well done.	Steak is like butter!	Steak was delicious.	Steaks were cooked perfect to our liking.	The food was excellent, I like my steak	Steak was seasoned just the way I like it and a perfect medium rare to rare like requested.	Steak was delicious.
I hate when it's too loud.	I prefer a quieter place	Restaurant was loud.	Gotta love it!	Lovely ambience.	Good ambiance.	Excellent spot to spend time alone or talk business.	The place has a nice atmosphere.
This restaurant is too busy for me.	I prefer a quieter place.	Couldn't ask for more from a restaurant!	We had to wait 30+ minutes for the food and	Excellent example of a service oriented restaurant.	Good ambiance.	Excellent spot to spend time alone or talk business.	The place has a nice atmosphere.
I'm not into healthy food.	I prefer unhealthy food.	I'm vegan for health reasons.	Food is so good and feels like I'm eating healthy even of	But I‚Äôm not a BBQ aficionado	Food is so good and feels like I'm eating healthy even of	I'm vegan for health reasons.	Food is soo delicious.
I am no match for spicy food.	I prefer mild food.	But I‚Äôm not a BBQ aficionado	Fish tacos are so good, sauce is very hot	Spicy chix sandwich is the best.	I order medium well.	Quality Meals, mmm, my favorite treat.	Everything was fresh and flavorful .
I have like $10 to spend.	I prefer a less expensive place.	($17)	I comes with a particular price tag ...	Be prepared to spend a pretty penny.	Great place & service at reasonable prices.	Great place for quality meals.	Quality food at a more than reasonable price.
I don't like red meat.	I prefer poultry.	I only eat Beef Brisket here because is delicious!	But I‚Äôm not a BBQ aficionado	I'm vegan for health reasons.	Chicken moist and tender.	Chicken flautas are always delish.	Chicken Picatta was basic, but flavorful.
I only like burritos when they are well made.	I prefer a place that makes really good burritos.	Quesadillas are the best!!!	I love the chicken tacos!	I have had the burritos here years ago and couldn't remember if I liked them or not, so I decided to try tacos this time.	Pretty good place for quick tacos and Quesadilla.	My go to for tacos on the way home I've been here 3 times and is just good small faster place to came for Mexican food they even have a drive thru	A very nice place to get some decent tacos to go.
I haven't had a steak in years.	I prefer fish.	I had a ribeye that was amazing.	Steak was seasoned just the way I like it and a perfect medium rare to rare like requested.	Steak was delicious.	delicious steaks and seafood...	Everything delicious with an exception of the shrimps.	For dinner, I enjoyed the scallops one night and the sea bass the second.
Booth seating would be more comfortable.	I prefer bench seating.	Outdoor seating available.	Spendy and could be a more relaxed atmosphere.	Their outdoor seating is informal and good for young folks.	Outdoor seating available.	Wheelchair accessible.	After 10ish more open seating.
I love trying new cuisines from other cultures around the world.	I prefer a place that serves food from a specific culture/country.	I grew up on the east coast eating a lot of good Italian food both in restaurants and homemade by family.	Chinese food here - super tasty.	brazilian food, so fresh.	Superior restaurant, the only place I will have the dim sum.	Food, service and ambiance are great!	Great place for quality meals.
Let's keep it within a certain price range.	I prefer a more expensive place.	I comes with a particular price tag ...	However , the price is relatively high .	Good value for money.	Great place for quality meals.	A nice place to splurge on.	Great place & service at reasonable prices.
That's a really bad salad.	I prefer a fancier salad.	Amazing salad.	Best salad I've ever had.	The Caesar salad was very good, with the dressing being the best part of the entire salad.	Fresh salad, I love bread and delicious pot pie.	Best salad I've ever had.	I also had a wedge salad which also met expectations.
The heat in Tex-Mex is too much for me.	I prefer a cooler place.	One of the only taqueria's in San Jose that I love good tortillas!	Fish tacos are so good, sauce is very hot	There was the best Brazilian BBQ which I‚Äôve ever had.	One of my favorite places!!	In good weather, I particularly enjoy the outdoor dining.	And secondly the Lounge, where you can just a get a drink and enjoy the view.
I'd like to make a better impression on my date.	I prefer a place that is fancier.	Best for dates.	Valentines Day Date night with the wife.	This was a wonderful Valentine's Day experience.	elegant, upscale and classy place for a special occasion.	A great place for a meal or just cocktails and a view.	Superior restaurant, the only place I will have the dim sum.
International cuisine feels risky to me.	I prefer to eat local food.	Chinese food here - super tasty.	brazilian food, so fresh.	Chinese food... excellent.	I love the food here.	I only eat Beef Brisket here because is delicious!	Food is absolutely delicious and there are so many choices!
Fancy restaurants are not convenient.	I prefer a comfortable place.	Excellent example of a service oriented restaurant.	a little pricey with some dishes better than others.	There's hardly ever anything to complain about when coming here to dine.	the best view!!!	The place was very comfy and cozy.	We enjoy to go out.
Not a fan of red meat.	I prefer chicken, fish, or veggie.	I only eat Beef Brisket here because is delicious!	But I‚Äôm not a BBQ aficionado	were truly from the smoker, and they had the feel of mostly grilled ribs to me, which I do not like.	Lamb and beef plate is great, I get that with hummus veggies and rice.	I'm vegan for health reasons.	My favorite dish is the Pappardelle Pasta with the tomato basil sauce.
I prefer soups over salads.	I prefer a place that has good soups.	My favorite dish is the Pappardelle Pasta with the tomato basil sauce.	Fresh salad, I love bread and delicious pot pie.	Spinach salad was delish!	Great place for quality meals.	One of my top places for tasty quality meals.	Their soup is great Great food.
Crowded places make me anxious.	I prefer a more relaxed place.	Crowded.	I love snacking here.	It can seem a bit stuffy when you are young but when you're an old timer like me just wanting to get away from the kids for a night, you appreciate the dimly lit rooms, quiet music, and non crowds.	Very nice place to relax have a cocktail and apitizers.	Excellent spot to spend time alone or talk business.	üòãüòã Good cozy place with decent food and drinks
That's too bland for me.	I prefer a more flavorful dish.	other than that, it's good.	Very cheesy, very fresh!	Coffee was a bit bland though.	My favorite dish is the Pappardelle Pasta with the tomato basil sauce.	both delish	Both were delicious.
It doesn't have outdoor seating.	I prefer a more open-air place.	It has a lovely outdoor seating.	Outdoor seating available.	Their outdoor seating is informal and good for young folks.	My favourite location!	Good ambiance.	One of my favorite places!!
When I have experimental cuisine food choices are very limited.	I prefer a more varied menu.	Food is always great...lot of variety in veg and non	All of the food was good and cooked exactly as I wanted.	In recent memory, I can truly say I have not had a better dining experience.	The menu is great.	Menu is simple but well done, they welcome substitutions and portion size changes.	Good menu with many things to try.
I am pretty picky about what Asian foods I eat.	I prefer Italian, French, Spanish foods.	Chinese food here - super tasty.	Chinese food... excellent.	I love love love Indian food and have tested plenty of restaurants.	It was by far my favorite Italian cuisine compared to the other three	I grew up on the east coast eating a lot of good Italian food both in restaurants and homemade by family.	It was one of my favorite Italian dishes I‚Äôve ever tried.
My entire family is lactose intolerant.	I prefer an allergen-free place.	I'm vegan for health reasons.	then again, I love cheese.	My mom had a tapioca pudding with fruit for dessert with a raspberry sauce that knocked my socks off.	Always a good place to take tourists/friends visiting from out of town	Everything about the place is excellent/outstanding.	I recommend this place with pleasure.
Not kid-friendly.	I prefer a kid-friendly place.	Very kid friendly.	TEENS AND KIDS ATLEAST	Great for the kids.	It's a nice place to go during the day with your children.	This is an affordable, kid-friendly place specialized in burgers and American food.	Overall a great place for a date or a family dinner.
I eat like a bird.	I prefer smaller portions.	I felt like a sardine in a can.	sometimes the chicken can be weird	Over all enjoyed every bite of the dinner.	Smaller portions, but very tasty	The downside was the size of the portions.	Large enough for two meals!
I like saltwater fish once in a while.	I prefer fresh fish.	For dinner, I enjoyed the scallops one night and the sea bass the second.	The scallops are terrific.	The shrimp tasted so fresh!!	The fish was so fresh and	delicious steaks and seafood...	Best steals and freshest seafood.
I always eat too much at buffets.	I prefer a la carte.	I went for a lunch buffet and they had wide variety in the buffet menu.	I was full by the time my salmon entree came to the table!	In recent memory, I can truly say I have not had a better dining experience.	I liked my red velvet martini, and the calamari.	I comes with a particular price tag ...	I order medium well.
I'm not a fan of salads.	I prefer a place with more appetizing food.	Fresh salad, I love bread and delicious pot pie.	Best salad I've ever had.	I'm vegan for health reasons.	One of my preferred places for tasty Quality Meals.	Great place for quality meals.	One of my top places for tasty quality meals.
I'm not a wine person.	I prefer a good beer.	Wine pairing was helpfully suggested.	My cocktail was delicious as well.	wonderful wine with the generous poor..	The beers on tap are all excellent.	Excellent drinks , just okay food.	Good burgers and beer.
This is not a special occasion.	I prefer a more casual place.	Special occasion place.	It was a very special evening.	What a wonderful surprise we had!	This is a great place for friends or a cute date night.	Great place to meet and catch up with friends.	Overall a great place for a date or a family dinner.
I don't eat meat or fish.	I prefer a vegetarian restaurant.	I'm vegan for health reasons.	I only eat Beef Brisket here because is delicious!	But I‚Äôm not a BBQ aficionado	Really nice restaurant if you want to eat some excellent meats.	Such a great selection of vegetarian & vegan options too!	but it is fine dining Very good restaurants for meat lovers, you can choose from all kinds of steaks.
I only eat fast food when nothing else is available.	I prefer to eat better food.	Food is good, open late and a drive thru !!	Good food for being fast food	I always order tacos and rice.	Food is so good and feels like I'm eating healthy even of	Food is absolutely delicious and there are so many choices!	Good food.
I'm not a fan of salmon.	I prefer a different kind of fish.	I ordered the salmon which was okay, it was cooked well	I was also able to try the salmon.	I found that I do not enjoy tuna, but my mom thought it was excellent.	For dinner, I enjoyed the scallops one night and the sea bass the second.	I liked my red velvet martini, and the calamari.	The shrimp tasted so fresh!!
I'm not big on ethnic food.	I prefer food with more familiar flavors.	Chinese food here - super tasty.	I grew up on the east coast eating a lot of good Italian food both in restaurants and homemade by family.	Options for indian taste were quite limited.	Food is absolutely delicious and there are so many choices!	both delish	Both were delicious.
Not enough vegetarian options.	I prefer more vegetarian options.	For instance, they could use a few more vegetarian options.	Great meat and salad options!	Such a great selection of vegetarian & vegan options too!	For instance, they could use a few more vegetarian options.	Such a great selection of vegetarian & vegan options too!	Had good vegetarian options as well.
Mexican food is too spicy for me.	I prefer bland food.	Fish tacos are so good, sauce is very hot	One of the only taqueria's in San Jose that I love good tortillas!	I always order tacos and rice.	Food is absolutely delicious and there are so many choices!	Good food.	Good food.
I'm not interested in fish. Family style restaurants are usually lame.	I prefer chicken. I prefer a quiet place.	The menu does not offer a lot of things and mostly offers steaks and chicken courses.	The sushi was fair but not very special and the menu looked very standard.	Both lobster bisque and steak were little salty for me but overall great food and nice that they were served hot!	The food was excellent, I like my steak	In good weather, I particularly enjoy the outdoor dining.	I enjoyed eating here.												The food was excellent, I like my steak	In good weather, I particularly enjoy the outdoor dining.	I love the food here.	Love eating here!	Food, service and ambiance are great!	The food in this place is delicious üòã and the lemon pie is my favorite.	One of my preferred places for tasty Quality Meals.	I enjoyed eating here.	Chicken flautas are always delish.	Great place to relax and have a bite to eat and get away from the loudness of the city.	I enjoyed my evening (dinner) in this place.	Best Chicken	OUTSIDE OF THIS SMALL PLACE IS A GOOD AREA TO EAT....	Good food in a relaxed atmosphere.	Really nice restaurant if you want to eat some excellent meats.
I'm not willing to deal with rude staff. Organic foods are boring.	I prefer to go to a more friendly place. I prefer a non-organic place.	I‚Äôve been a customer for 8 years now, good food for decent prices.	The food is always fresh and flavorful, cashiers provides excellent service.	but staff was excellent and had a great experience Delicious lunch, great customer service and awesome options.	OUTSIDE OF THIS SMALL PLACE IS A GOOD AREA TO EAT....	Really nice restaurant if you want to eat some excellent meats.	I go here whenever I want something Good, filling, and great price..												OUTSIDE OF THIS SMALL PLACE IS A GOOD AREA TO EAT....	Really nice restaurant if you want to eat some excellent meats.	In good weather, I particularly enjoy the outdoor dining.	Pleasant outdoor dining good food good service Good place with a calm atmosphere.	This is a great place with great food.	One of my preferred places for tasty Quality Meals.	Food, service and ambiance are great!	I go here whenever I want something Good, filling, and great price..	but it is fine dining Very good restaurants for meat lovers, you can choose from all kinds of steaks.	Great place for quality meals.	üòãüòã Good cozy place with decent food and drinks	Farmers has always been one of my favorite restaurants in the area!	Overall a great place for a date or a family dinner.	Good food in a relaxed atmosphere.	I enjoyed eating here.
I'm saving up for a car. I hate when it's too loud.	I prefer a place that is more affordable. I prefer a quieter place	It can seem a bit stuffy when you are young but when you're an old timer like me just wanting to get away from the kids for a night, you appreciate the dimly lit rooms, quiet music, and non crowds.	I like the front window or the roof top, service is just nice and clean.	I think, at the weekend this place will be crowded and too noisy.	üòãüòã Good cozy place with decent food and drinks	Great place to relax and have a bite to eat and get away from the loudness of the city.	Spendy and could be a more relaxed atmosphere.												üòãüòã Good cozy place with decent food and drinks	Great place to relax and have a bite to eat and get away from the loudness of the city.	Cool place, efficient and friendly staff and good food.	Good food in a relaxed atmosphere.	In good weather, I particularly enjoy the outdoor dining.	Great place for quality meals.	It's a lovely place with outdoor seating.	Spendy and could be a more relaxed atmosphere.	And secondly the Lounge, where you can just a get a drink and enjoy the view.	Very small place, but the food is great and the prices are affordable.	Pleasant outdoor dining good food good service Good place with a calm atmosphere.	A great place for a meal or just cocktails and a view.	Food, service and ambiance are great!	Overall a great place for a date or a family dinner.	Best neighborhood patio that's tucked away above the street Amazing ambience and super personal service.
I'm not into Asian fusion. I haven't had a steak in years.	I prefer traditional French cuisine. I prefer fish.	But I‚Äôm not a BBQ aficionado	I only eat Beef Brisket here because is delicious!	However nothing out here compares to the meats you get in Texas - some of the meats served	It was by far my favorite Italian cuisine compared to the other three	My favorite dish is the Pappardelle Pasta with the tomato basil sauce.	Everything delicious with an exception of the shrimps.												It was by far my favorite Italian cuisine compared to the other three	My favorite dish is the Pappardelle Pasta with the tomato basil sauce.	Both lobster bisque and steak were little salty for me but overall great food and nice that they were served hot!	I liked my red velvet martini, and the calamari.	we‚Äôve had some warm bread with butter, young roasted chicken with beans, smoked octopus with hummus and a very soft baked chicken breast,with some pickled onions and mushrooms.	All were excellent, but the salmon was really something special: perfectly cooked so that it was still tender and moist, topped with crab and bernaise, on a bed of mashed celeriac.	South African Lobster is the best around!	Everything delicious with an exception of the shrimps.	delicious steaks and seafood...	For dinner, I enjoyed the scallops one night and the sea bass the second.	I selected the pasta option minus the seafood.	We started with the Cast Iron Mediterranean Mussels, tasty with garlic and herbs.	We started with appetizers, our choice was crab legs, oysters, shrimp, smoked salmon and Blue cheese.	I grew up on the east coast eating a lot of good Italian food both in restaurants and homemade by family.	Delicious and a wide variety of dishes.
I think the last time I went to a Thai place I was in college. I'd like to make a better impression on my date.	I prefer Italian food. I prefer a place that is fancier.	The food was good overall, we enjoy Asian food and this hit the spot.	My expectations of coming to San Francisco and eating in a "Chinatown" restaurant with some sense of flair were not really fulfilled, that being said it was good food reasonably priced and accommodating.	Hands down the best Chinese food in the country I came here with a professor and another student on the Professor's recommendation.	It was by far my favorite Italian cuisine compared to the other three	Great food with traditional Italian favorites as well as some more inventive menu items.	The best Italian food I've had in Chicago, so far.												It was by far my favorite Italian cuisine compared to the other three	Great food with traditional Italian favorites as well as some more inventive menu items.	Food is great but this place stands above the rest because of the homemade red salsa .	I really love the Greek salad here with lamb and beef meat.	The Lasagna is just amazing and is the food I order the most.	The service and food are excellent, highly recommended Amazing and Chicago famous Italian cuisine.	It was one of my favorite Italian dishes I‚Äôve ever tried.	The best Italian food I've had in Chicago, so far.	I grew up on the east coast eating a lot of good Italian food both in restaurants and homemade by family.	Italian food Good portion, great music and a good place to go for a romantic date Always a great italian classic!	An Italian restaurant with great atmosphere and food One of my favorite italian places in the heart of Chicago.	Great, old style Italian food with excellent service from the front door all the way through dessert.	Best Italian food!	With so many Italian restaurant choices in the area, so glad we went here.	Greek food and the atmosphere here is quality.
I had a big meal earlier. I'm not a fine dining type of person.	I prefer a lighter meal. I prefer a more casual place.	All of the food was good and cooked exactly as I wanted.	I was to full to have dessert!	I was full by the time my salmon entree came to the table!	In good weather, I particularly enjoy the outdoor dining.	I usually just get one or two drinks and either a dessert or a appetizer (because of the cost) but the view is out of the world!	Good food in a relaxed atmosphere.												In good weather, I particularly enjoy the outdoor dining.	I usually just get one or two drinks and either a dessert or a appetizer (because of the cost) but the view is out of the world!	OUTSIDE OF THIS SMALL PLACE IS A GOOD AREA TO EAT....	quality meals and the setting at this place is excellent.	Food is good, open late and a drive thru !!	My top spot for tasty quality meals.	Quality Meals and the scene here is great.	Good food in a relaxed atmosphere.	Superior restaurant, the only place I will have the dim sum.	I usually order to-go, but there is indoor seating if you prefer to dine-in (as of 10/20, although capacity is reduced due to COVID)	I always get the chicken flautas entree, garlic shrimp tacos and the cheese	Food is good, lots of choices at the salad bar.	Everything in the buffet is always high quality, has great flavor and a good amount of heat.	I always order tacos and rice.	Quality Meals and the scene at this spot is excellent.
This place is no fun. I don't eat fast food.	I prefer a fun place. I prefer a more healthy place.	But I eat here once and a while staring my commute home.	Food is good, open late and a drive thru !!	In recent memory, I can truly say I have not had a better dining experience.	In good weather, I particularly enjoy the outdoor dining.	Overall a great place for a date or a family dinner.	I love the food here.												In good weather, I particularly enjoy the outdoor dining.	Overall a great place for a date or a family dinner.	Good food in a relaxed atmosphere.	This is a great place for friends or a cute date night.	I love snacking here.	and I love this place.	Love eating here!	I love the food here.	I enjoyed eating here.	A great place for a meal or just cocktails and a view.	This is a great place with great food.	Food is absolutely delicious and there are so many choices!	üòãüòã Good cozy place with decent food and drinks	OUTSIDE OF THIS SMALL PLACE IS A GOOD AREA TO EAT....	It's a lovely place with outdoor seating.
Jalapenos are my limit. Family style restaurants are usually lame.	I prefer food without jalapenos. I prefer a quiet place.	I always get the chicken flautas entree, garlic shrimp tacos and the cheese	The last time I went, my friend asked for fish tacos and my niece had buffalo wings and they were all delicious.	Nachos are bomb	I always get the chicken flautas entree, garlic shrimp tacos and the cheese	I always order tacos and rice.	Fish tacos are so good, sauce is very hot												I always get the chicken flautas entree, garlic shrimp tacos and the cheese	I always order tacos and rice.	One of the only taqueria's in San Jose that I love good tortillas!	Pretty good place for quick tacos and Quesadilla.	Everything in the buffet is always high quality, has great flavor and a good amount of heat.	The pitas that come with the meals are warm and soft.	I have had the burritos here years ago and couldn't remember if I liked them or not, so I decided to try tacos this time.	Fish tacos are so good, sauce is very hot	Quesadillas are the best!!!	Nachos are bomb	This place has killer quesadillas with delicious guacamole to go with them.	Food is great but this place stands above the rest because of the homemade red salsa .	My go to for tacos on the way home I've been here 3 times and is just good small faster place to came for Mexican food they even have a drive thru	I love the chicken tacos!	In good weather, I particularly enjoy the outdoor dining.
I gave up sugar last year. The menu isn't very diverse.	I prefer a place that doesn't serve dessert. I prefer a place with a more diverse menu.	Only a few specialty drinks offered which was a bit of a disappointment	Cheesecake Factory is one of the few chain Restaurants that have held standards, quality of food, drink and service.	Oreo and red velvet are the best cheesecakes, but I tried many and all are good!	Superior restaurant, the only place I will have the dim sum.	Cheesecake Factory is one of the few chain Restaurants that have held standards, quality of food, drink and service.	Neat restaurant and great cheesecake but its a bit juvenile in its decor for what could be an upscale restaurant.												Superior restaurant, the only place I will have the dim sum.	Cheesecake Factory is one of the few chain Restaurants that have held standards, quality of food, drink and service.	Great food but service can be better.	This place has a good vibe and a decent menu.	I go to fabulous restaurants on a regular basis, Michelin stars, Top Chef, etc, so food wise, excellent of course.	Good food in a relaxed atmosphere.	Excellent service ambience & cuisine!!!	Neat restaurant and great cheesecake but its a bit juvenile in its decor for what could be an upscale restaurant.	Food, service and ambiance are great!	I love going here and getting take out or just a delicious slice of cheese cake.	But menu is just beautiful and food is great too.	Great, old style Italian food with excellent service from the front door all the way through dessert.	A good authentic restaurant with decent inside decor.	Generous portions, especially the desserts.	Very good upscale restaurant.
The food is more important than the view. I could go to a mom and pop burger place.	I prefer food that is cooked by a professional. I prefer a more unique burger place.	But menu is just beautiful and food is great too.	Food is good, open late and a drive thru !!	A fun place to eat give plenty of fries better than McDonald's all the food	4 stars only because I've had a way better, gourmet burger elsewhere for the price.	Good burgers, fries, and service.	Very greasy chicken but burgers were excellent!!!												4 stars only because I've had a way better, gourmet burger elsewhere for the price.	Good burgers, fries, and service.	I'd highly recommend the fries - just the right amount of crispy and some of the best I've ever had.	Wonderful chain steak house with consistent quality of food and service.	Best NY steak on the planet.	The Fries were nice because they were standard and had no unique flavor, but decent fries!	Turkey burger and fries, both very tasty!	Very greasy chicken but burgers were excellent!!!	Very good burger and fry establishment.	The fries are the best I have ever had.	Good place, good burgers.	The Impossible Burger is the best vegetarian burger I have ever had.	My chicken sandwich and fries were both hot and yummy Great food and friendly staff!	were truly from the smoker, and they had the feel of mostly grilled ribs to me, which I do not like.	but it is fine dining Very good restaurants for meat lovers, you can choose from all kinds of steaks.
I'm not a fan of American style cuisine. I don't really like red meat.	I prefer Mediterranean cuisine, Asian cuisine, Mexican cuisine or Italian cuisine. I prefer chicken or fish.	I only eat Beef Brisket here because is delicious!	But I‚Äôm not a BBQ aficionado	were truly from the smoker, and they had the feel of mostly grilled ribs to me, which I do not like.	It was by far my favorite Italian cuisine compared to the other three	I grew up on the east coast eating a lot of good Italian food both in restaurants and homemade by family.	I always get the chicken flautas entree, garlic shrimp tacos and the cheese												It was by far my favorite Italian cuisine compared to the other three	I grew up on the east coast eating a lot of good Italian food both in restaurants and homemade by family.	Always amazing, high quality and real Mexican cuisine.	We started with the Cast Iron Mediterranean Mussels, tasty with garlic and herbs.	delicious steaks and seafood...	Best Italian food!	I always order tacos and rice.	I always get the chicken flautas entree, garlic shrimp tacos and the cheese	Our first choice has been the Thai Chili Chicken, White Chili Chicken... and the list goes on!	My favorite dish is the Pappardelle Pasta with the tomato basil sauce.	We started with appetizers, our choice was crab legs, oysters, shrimp, smoked salmon and Blue cheese.	Everything delicious with an exception of the shrimps.	I really love the Greek salad here with lamb and beef meat.	Chinese food here - super tasty.	Great food with traditional Italian favorites as well as some more inventive menu items.
I would only eat snails if I were forced. I don't eat meat.	I prefer more common food. I prefer a vegetarian restaurant.	Everything delicious with an exception of the shrimps.	I'm vegan for health reasons.	Calamari were surprisingly good for a pizza place.	but it is fine dining Very good restaurants for meat lovers, you can choose from all kinds of steaks.	Large selection of vegetarian and non-vegetarian meals.	Such a great selection of vegetarian & vegan options too!												but it is fine dining Very good restaurants for meat lovers, you can choose from all kinds of steaks.	Large selection of vegetarian and non-vegetarian meals.	Really nice restaurant if you want to eat some excellent meats.	I go to fabulous restaurants on a regular basis, Michelin stars, Top Chef, etc, so food wise, excellent of course.	I just love their food.	I love love love Indian food and have tested plenty of restaurants.	Great meat and salad options!	Such a great selection of vegetarian & vegan options too!	Had good vegetarian options as well.	Food is absolutely delicious and there are so many choices!	I'm vegan for health reasons.	For instance, they could use a few more vegetarian options.	I only eat Beef Brisket here because is delicious!	Food is always great...lot of variety in veg and non	I really love the Greek salad here with lamb and beef meat.
I can't eat animals. A good Merlot makes the meal better.	I prefer vegetarian food. I prefer wine over beer.	I had the lamb and it was pretty damn good.	Love me a great Malbec and ribeye and this hit the spot!	Food is good and wine is OK.	Food is good and wine is OK.	I'm vegan for health reasons.	I only eat Beef Brisket here because is delicious!												Food is good and wine is OK.	I'm vegan for health reasons.	Delicious but also more of a brunch type of drink.	Well prepared and delicious Indian food (I ate vegetarian food).	Good burgers and beer.	Very nice steaks and wine.	delicious steaks and seafood...	I only eat Beef Brisket here because is delicious!	Fantastic steaks and wine.	Excellent drinks , just okay food.	Food is always great...lot of variety in veg and non	Love me a great Malbec and ribeye and this hit the spot!	I had the steak and eggs with a dark and stormy since I love rum.	Food is absolutely delicious and there are so many choices!	I really love the Greek salad here with lamb and beef meat.
That's so tacky. The menu isn't very diverse.	I prefer something classier. I prefer a place with a more diverse menu.	Neat restaurant and great cheesecake but its a bit juvenile in its decor for what could be an upscale restaurant.	The menu does not offer a lot of things and mostly offers steaks and chicken courses.	But menu is just beautiful and food is great too.	Superior restaurant, the only place I will have the dim sum.	But menu is just beautiful and food is great too.	This place has a good vibe and a decent menu.												Superior restaurant, the only place I will have the dim sum.	But menu is just beautiful and food is great too.	Very good upscale restaurant.	Great decor, helpful staff, and a variety of modern American and European food options.	The prices are high but appropriate; overall, I rate this restaurant as a good value for fine dining, perfect for a business dinner or special occasion.	A great place for a meal or just cocktails and a view.	quality meals and the setting at this place is excellent.	This place has a good vibe and a decent menu.	Food, service and ambiance are great!	Good menu with many things to try.	The menu is concise, the prices are high and the portions are modest, but the quality is excellent.	menu is like a cafe in boston i loved.	The restaurant has a great view and both choices of food were simply delicious and sophisticated.	elegant, upscale and classy place for a special occasion.	It was a classy restaurant with great food varieties.
I'm not a fine dining type of person. I'm not into Asian fusion.	I prefer a more casual place. I prefer traditional French cuisine.	But I‚Äôm not a BBQ aficionado	The food was good overall, we enjoy Asian food and this hit the spot.	In recent memory, I can truly say I have not had a better dining experience.	Great food with traditional Italian favorites as well as some more inventive menu items.	It was by far my favorite Italian cuisine compared to the other three	Great, old style Italian food with excellent service from the front door all the way through dessert.												Great food with traditional Italian favorites as well as some more inventive menu items.	It was by far my favorite Italian cuisine compared to the other three	The service and food are excellent, highly recommended Amazing and Chicago famous Italian cuisine.	Superior restaurant, the only place I will have the dim sum.	But menu is just beautiful and food is great too.	Good food in a relaxed atmosphere.	Great decor, helpful staff, and a variety of modern American and European food options.	Great, old style Italian food with excellent service from the front door all the way through dessert.	Italian food Good portion, great music and a good place to go for a romantic date Always a great italian classic!	With so many Italian restaurant choices in the area, so glad we went here.	Overall is perfect for my first time French restaurant adventure.	I go to fabulous restaurants on a regular basis, Michelin stars, Top Chef, etc, so food wise, excellent of course.	An Italian restaurant with great atmosphere and food One of my favorite italian places in the heart of Chicago.	Excellent service ambience & cuisine!!!	This is a 5 star, vegetarian-friendly, fine-dining place specialized in French and American food with a good wine menu.
We can do better than pizza. It is kind of trashy.	I prefer a fancier place. I prefer a more upscale place.	We enjoyed the deep dish pizza, it is delicious.	We enjoyed one of the best Chicago pizza.	The pizza is made with fresh, quality ingredients, which adds to the great taste of the pizza here.	Superior restaurant, the only place I will have the dim sum.	elegant, upscale and classy place for a special occasion.	But menu is just beautiful and food is great too.												Superior restaurant, the only place I will have the dim sum.	elegant, upscale and classy place for a special occasion.	One of my preferred places for tasty Quality Meals.	Very upscale, but tasty in a way that you'll appreciate.	I just love this place, its menu and its owners.	The best restaurant around here.	The prices are high but appropriate; overall, I rate this restaurant as a good value for fine dining, perfect for a business dinner or special occasion.	But menu is just beautiful and food is great too.	Food, service and ambiance are great!	A great place for a meal or just cocktails and a view.	Great place for quality meals.	Very good upscale restaurant.	Overall a great place for a date or a family dinner.	This place has a good vibe and a decent menu.	quality meals and the setting at this place is excellent.
This place is no fun. I don't really like seafood.	I prefer a fun place. I prefer beef or chicken.	I love the food here.	The place is extremely crowded and noisy - not a place for a romantic dinner :))	The food here is delicious!	but it is fine dining Very good restaurants for meat lovers, you can choose from all kinds of steaks.	Overall a great place for a date or a family dinner.	The food was excellent, I like my steak												but it is fine dining Very good restaurants for meat lovers, you can choose from all kinds of steaks.	Overall a great place for a date or a family dinner.	I enjoyed eating here.	I love the food here.	My favorite selections are the Steak Tartare and the Lamb Chops.	One of my preferred places for tasty Quality Meals.	Love eating here!	The food was excellent, I like my steak	My preferred location for delicious Burgers.	I only eat Beef Brisket here because is delicious!	Really nice restaurant if you want to eat some excellent meats.	OUTSIDE OF THIS SMALL PLACE IS A GOOD AREA TO EAT....	Food is absolutely delicious and there are so many choices!	Good food in a relaxed atmosphere.	Great place to go to for a great meal.
I don't like family style restaurants. I'm avoiding fancy places.	I prefer a place where I can remain undisturbed. I prefer a more relaxed place.	Superior restaurant, the only place I will have the dim sum.	I guess I didn't really go into the restaurant a few years ago, just the bar area for happy hour.	Besides this, the restaurant is conveniently located near many shopping destinations, and I was very happy with the experience I had here.	A few steps from the busy street and a very fresh and relaxing place to talk and unwind.	üòãüòã Good cozy place with decent food and drinks	I wish we could enjoy the beautiful room inside as well.												A few steps from the busy street and a very fresh and relaxing place to talk and unwind.	üòãüòã Good cozy place with decent food and drinks	A great place for a meal or just cocktails and a view.	Great place to be at night.	A great hideaway to relax and refuel after a shopping excursion.	I bring almost all my friends visiting to this place.	It's a nice place to go during the day with your children.	I wish we could enjoy the beautiful room inside as well.	Excellent spot to spend time alone or talk business.	In good weather, I particularly enjoy the outdoor dining.	Very nice place to relax have a cocktail and apitizers.	The place was very comfy and cozy.	Very well kept and convenient place.	And secondly the Lounge, where you can just a get a drink and enjoy the view.	It's a lovely place with outdoor seating.
Supporting small business makes me happier. This place looks chaotic.	I prefer a small business over a corporate place. I prefer a more organized place.	After having one personal experience here very recently, i have become fan of this place more and more and to the whole staff-	Really like this place	This place is awesome!	Food, service and ambiance are great!	This is a great place to a business or special moment dinner.	Besides this, the restaurant is conveniently located near many shopping destinations, and I was very happy with the experience I had here.												Food, service and ambiance are great!	This is a great place to a business or special moment dinner.	Is a great place to go, the structure of the restaurant is nice Excellent!	Best neighborhood patio that's tucked away above the street Amazing ambience and super personal service.	Cool place, efficient and friendly staff and good food.	Great food but service can be better.	I go here whenever I want something Good, filling, and great price..	Besides this, the restaurant is conveniently located near many shopping destinations, and I was very happy with the experience I had here.	I really like the food and customer service, great location very close to my residence.	I‚Äôve been a customer for 8 years now, good food for decent prices.	it is a nice place with good employees	All in all, ambiance, food and customer service is one of a kind!	It's still a nice restaurant with good food and helpful staff.	Fantastic and flavorful food, I love the ambience this place has, and the cashiers were friendly.	It's plenty of restaurants around the Water Tower Place that will gladly take my money, with a smile and good customer service M Burger
I don't like food that's already made. They seem to have too many people.	I prefer freshly made food. I prefer a more quiet place.	Wide selection of food, but not overwhelming.	Food is absolutely delicious and there are so many choices!	For instance, they could use a few more vegetarian options.	In good weather, I particularly enjoy the outdoor dining.	Food, service and ambiance are great!	The food is always great.												In good weather, I particularly enjoy the outdoor dining.	Food, service and ambiance are great!	But menu is just beautiful and food is great too.	I enjoyed eating here.	I also enjoy going to the Spa Before Dinner.	Food is well prepared, staff is friendly and tables and area is well cleaned and kept.	Delicious food, great service every time and the decor and atmosphere of the restaurant is so charming and warm.	The food is always great.	Good food in a relaxed atmosphere.	Great place to relax and have a bite to eat and get away from the loudness of the city.	Food is absolutely delicious and there are so many choices!	Food is always consistently great.	The service and food are always great.	Everything in the buffet is always high quality, has great flavor and a good amount of heat.	I love the food here.
It seems too fancy. Spicy food gives me an adrenaline rush.	I prefer a more casual place. I prefer mild food.	so amazing, it's like having Greek style Chipotle, the food is amazing.	Food is so good and feels like I'm eating healthy even of	I always get the chicken flautas entree, garlic shrimp tacos and the cheese	Superior restaurant, the only place I will have the dim sum.	Food, service and ambiance are great!	Good food in a relaxed atmosphere.												Superior restaurant, the only place I will have the dim sum.	Food, service and ambiance are great!	One of my preferred places for tasty Quality Meals.	Overall a great place for a date or a family dinner.	I go to fabulous restaurants on a regular basis, Michelin stars, Top Chef, etc, so food wise, excellent of course.	Food is good, open late and a drive thru !!	Excellent portions, fresh ingredients and a solid mainstream selection of things to taste.	Good food in a relaxed atmosphere.	Great food but service can be better.	But menu is just beautiful and food is great too.	Great place for quality meals.	Very upscale, but tasty in a way that you'll appreciate.	Everything in the buffet is always high quality, has great flavor and a good amount of heat.	This place has a good vibe and a decent menu.	One of my top places for tasty quality meals.
That steak is raw. Crowded places make me anxious.	I prefer my steak well done. I prefer a more relaxed place.	The service is fantastic, the steaks are out of this world.	Wow, a wonderful upscale place with exceptional quality meats, great atmosphere and service	The meat is absolutely delicious, awesomely seasoned and beautifully cooked.	The food was excellent, I like my steak	Steak was seasoned just the way I like it and a perfect medium rare to rare like requested.	I only eat Beef Brisket here because is delicious!												The food was excellent, I like my steak	Steak was seasoned just the way I like it and a perfect medium rare to rare like requested.	Was probably the best steak I've ever had along with the mashed potatoes that we asked for.	Steak was delicious.	Meat was well seasoned and well cooked.	All four of our steaks were cooked to perfection, and the service was very good!	Great steak and salmon.	I only eat Beef Brisket here because is delicious!	Steaks were cooked perfect to our liking.	Delicious sirloin and great selection of sides.	My favorite selections are the Steak Tartare and the Lamb Chops.	The meat is absolutely delicious, awesomely seasoned and beautifully cooked.	That plus a perfectly cooked steak makes this a great night out for any occasion.	Excellent steak and service!	but it is fine dining Very good restaurants for meat lovers, you can choose from all kinds of steaks.
It doesn't have a view. I don't feel like eating local cuisine.	I prefer a good view. I prefer a place with an international menu.	I guess I didn't expect it to be very good because it has a great view already, so the food mustn't be good.	It's got a nice view of the city and an open kitchen.	The menu does not offer a lot of things and mostly offers steaks and chicken courses.	But menu is just beautiful and food is great too.	Superior restaurant, the only place I will have the dim sum.	A great place for a meal or just cocktails and a view.												But menu is just beautiful and food is great too.	Superior restaurant, the only place I will have the dim sum.	Overall a great place for a date or a family dinner.	I usually just get one or two drinks and either a dessert or a appetizer (because of the cost) but the view is out of the world!	Great place to go to for a great meal.	OUTSIDE OF THIS SMALL PLACE IS A GOOD AREA TO EAT....	pizza and the setting at this location is excellent.	A great place for a meal or just cocktails and a view.	The restaurant has a great view and both choices of food were simply delicious and sophisticated.	Breathtaking views and private dining.	menu is like a cafe in boston i loved.	Food, service and ambiance are great!	And secondly the Lounge, where you can just a get a drink and enjoy the view.	One of my preferred places for tasty Quality Meals.	In good weather, I particularly enjoy the outdoor dining.
That's too upscale for me. I'm not a fan of Korean food.	I prefer a more casual place. I prefer sushi or Italian.	Only issue is the place is a bit pricy One of the best Indian food in Chicago.	The sushi was fair but not very special and the menu looked very standard.	Chinese food here - super tasty.	Sushi rolls and octopus salad were really flavorful and good, lounge seating is quite memorable and comfortable‚Ä¶ Great view and food.	Sushi is fresh, wine list is good, service is phenomenal.	Superior restaurant, the only place I will have the dim sum.												Sushi rolls and octopus salad were really flavorful and good, lounge seating is quite memorable and comfortable‚Ä¶ Great view and food.	Sushi is fresh, wine list is good, service is phenomenal.	The buffet is excellent with a good combination of meat/vegetarian dishes as well as spicy/non-spicy options.	Loved the wonton soup and duck salad Terrific upscale Chinese, get the soup dumplings or you've failed.	I will definitely come back there, to try some sushi and desserts.	I go to fabulous restaurants on a regular basis, Michelin stars, Top Chef, etc, so food wise, excellent of course.	Would not be my top sashimi restaurant, but for the convenience, it was worth it.	Superior restaurant, the only place I will have the dim sum.	This is my Favorite Sushi Restaurant in Chicago.	Burger, Halibut Bouillabaisse, and sushi are all fantastic Very good breakfast food and service.	I highly recommend Shanghai Terrace over TAO or any hi end Chinese restaurant in the city.	üëèüëèüëèüëèüëèüëèüëèüëèüëè Far away the Best sushi place in Chicago	Overall a great place for a date or a family dinner.	It was by far my favorite Italian cuisine compared to the other three	Great place to go to for a great meal.
Most fancy restaurants are overrated. I don't enjoy eating indoors.	I prefer cheaper places. I prefer eating on the patio.	But menu is just beautiful and food is great too.	In recent memory, I can truly say I have not had a better dining experience.	Superior restaurant, the only place I will have the dim sum.	A little more pricey than the typical dinner spot, but the location and service are worth it.	Superior restaurant, the only place I will have the dim sum.	The price is amazing for the quality of food you get.												A little more pricey than the typical dinner spot, but the location and service are worth it.	Superior restaurant, the only place I will have the dim sum.	The buffet is excellent with a good combination of meat/vegetarian dishes as well as spicy/non-spicy options.	One of my preferred places for tasty Quality Meals.	Great place to relax and have a bite to eat and get away from the loudness of the city.	Food, service and ambiance are great!	quality meals at this spot - great.	The price is amazing for the quality of food you get.	Great place for quality meals.	Quality Meals and the scene at this spot is excellent.	The prices are high but appropriate; overall, I rate this restaurant as a good value for fine dining, perfect for a business dinner or special occasion.	One of my top places for tasty quality meals.	Great food at a reasonable price.	OUTSIDE OF THIS SMALL PLACE IS A GOOD AREA TO EAT....	Quality food at a more than reasonable price.
That's not exactly fresh. I'm allergic to lots of foods.	I prefer organic food. I prefer non-allergenic foods.	I'm vegan for health reasons.	Some bites were good, the sauce had a nice flavor, but the ribs overall were far too dry.	But I‚Äôm not a BBQ aficionado	I'm vegan for health reasons.	Food is always great...lot of variety in veg and non	Food is absolutely delicious and there are so many choices!												I'm vegan for health reasons.	Food is always great...lot of variety in veg and non	Such a great selection of vegetarian & vegan options too!	Food is great.	Food is fantastic!	Food is good and wine is OK.	Fresh salad, I love bread and delicious pot pie.	Food is absolutely delicious and there are so many choices!	Food is so good and feels like I'm eating healthy even of	I only eat Beef Brisket here because is delicious!	Food is soo delicious.	For instance, they could use a few more vegetarian options.	Well prepared and delicious Indian food (I ate vegetarian food).	Who cares--the food is great.	I am a huge fan of steaks, so i love coming here for my month protein.
I'm not in mood for pizza. My coworkers and I have less than 1h.	I prefer a more sophisticated cuisine. I prefer a place that will serve us quickly.	We ordered deep dish pizza and it was the best crust!!	(hour wait after ordering the pizza and 23 for small veggie deep dish)	45 minute wait for deep dish pizza but for the personal size lunch pizzas	Superior restaurant, the only place I will have the dim sum.	But menu is just beautiful and food is great too.	Excellent service ambience & cuisine!!!												Superior restaurant, the only place I will have the dim sum.	But menu is just beautiful and food is great too.	but we've always had great food and perfect service.	Overall, the food is good and cooked well.	Absolutely delicious food and a drive thru option	The service and food are always great.	Good food in a relaxed atmosphere.	Excellent service ambience & cuisine!!!	The restaurant has a great view and both choices of food were simply delicious and sophisticated.	The food here is very good like how you can get whatever toppings you want on your gyro without an extra charge.	Good, delicious food that serves food with history and smiles.	Delicious food, great service every time and the decor and atmosphere of the restaurant is so charming and warm.	Great food but service can be better.	A good authentic restaurant with decent inside decor.	we have been going to the restaurant for many years to enjoy their excellent authentic north indian cuisine..
I wouldn't eat anything raw or undercooked. I'm not in the mood for carbs.	I prefer cooked food only (no sushi or sashimi). I prefer a more protein-based meal.	Lamb and beef plate is great, I get that with hummus veggies and rice.	I'm vegan for health reasons.	You can either choose a pita, a bowl, or a salad with your choice of protein, as well as toppings.	Everything delicious with an exception of the shrimps.	Sushi quality is high and real, fresh fish.	My favorite dish is the Pappardelle Pasta with the tomato basil sauce.												Everything delicious with an exception of the shrimps.	Sushi quality is high and real, fresh fish.	Burger, Halibut Bouillabaisse, and sushi are all fantastic Very good breakfast food and service.	We started with appetizers, our choice was crab legs, oysters, shrimp, smoked salmon and Blue cheese.	Food is absolutely delicious and there are so many choices!	I selected the pasta option minus the seafood.	All were excellent, but the salmon was really something special: perfectly cooked so that it was still tender and moist, topped with crab and bernaise, on a bed of mashed celeriac.	My favorite dish is the Pappardelle Pasta with the tomato basil sauce.	Chinese food here - super tasty.	Both lobster bisque and steak were little salty for me but overall great food and nice that they were served hot!	I always get the chicken flautas entree, garlic shrimp tacos and the cheese	It may have literally been the best sushi I have ever had.	I always order tacos and rice.	Would not be my top sashimi restaurant, but for the convenience, it was worth it.	delicious steaks and seafood...
I'm not a fan of American style cuisine. That steak is raw.	I prefer Mediterranean cuisine, Asian cuisine, Mexican cuisine or Italian cuisine. I prefer my steak well done.	I only eat Beef Brisket here because is delicious!	Steak was seasoned just the way I like it and a perfect medium rare to rare like requested.	However nothing out here compares to the meats you get in Texas - some of the meats served	It was by far my favorite Italian cuisine compared to the other three	I grew up on the east coast eating a lot of good Italian food both in restaurants and homemade by family.	I really love the Greek salad here with lamb and beef meat.												It was by far my favorite Italian cuisine compared to the other three	I grew up on the east coast eating a lot of good Italian food both in restaurants and homemade by family.	Steak was seasoned just the way I like it and a perfect medium rare to rare like requested.	I only eat Beef Brisket here because is delicious!	There was the best Brazilian BBQ which I‚Äôve ever had.	It was one of my favorite Italian dishes I‚Äôve ever tried.	Lamb and beef plate is great, I get that with hummus veggies and rice.	I really love the Greek salad here with lamb and beef meat.	I always get the chicken flautas entree, garlic shrimp tacos and the cheese	My favorite selections are the Steak Tartare and the Lamb Chops.	My favorite dish is the Pappardelle Pasta with the tomato basil sauce.	The food was excellent, I like my steak	delicious steaks and seafood...	I've had at other high class restaurants, but the chimichurri and sun dried tomato puree that accompanied	Always amazing, high quality and real Mexican cuisine.
I often spend between $50 and $75 for a meal for two. I don't like red meat.	I prefer a place that is less expensive. I prefer poultry.	Yes a good steak is expensive!	But it was plenty to satisfy a craving for grilled meats, and I would come back if the dinner prices were a little cheaper.	Might seem pricey, but the portions are great and the steaks are mouthwatering.	Their steaks and lamb are also worth it.	Quality food at a more than reasonable price.	Great place for quality meals.												Their steaks and lamb are also worth it.	Quality food at a more than reasonable price.	Farmers has always been one of my favorite restaurants in the area!	One of my top places for tasty quality meals.	One of my preferred places for tasty Quality Meals.	Great food at a reasonable price.	Price is good, food is great	Great place for quality meals.	But it was plenty to satisfy a craving for grilled meats, and I would come back if the dinner prices were a little cheaper.	Yes a good steak is expensive!	The price is amazing for the quality of food you get.	For Indian food in the downtown area, I think this place has the best value.	but it is fine dining Very good restaurants for meat lovers, you can choose from all kinds of steaks.	Really nice restaurant if you want to eat some excellent meats.	Might seem pricey, but the portions are great and the steaks are mouthwatering.
I've only got 30 minutes. This restaurant is too busy for me.	I prefer a place that can be reached quickly. I prefer a quieter place.	We had to wait 30+ minutes for the food and	I will order here over and over again!!!	It's mainly a drive thru.	A few steps from the busy street and a very fresh and relaxing place to talk and unwind.	Great place to relax and have a bite to eat and get away from the loudness of the city.	In good weather, I particularly enjoy the outdoor dining.												A few steps from the busy street and a very fresh and relaxing place to talk and unwind.	Great place to relax and have a bite to eat and get away from the loudness of the city.	It's a lovely place with outdoor seating.	I bring almost all my friends visiting to this place.	The place has a nice atmosphere.	The place was very comfy and cozy.	This place has a beautiful atmosphere and shockingly enough	In good weather, I particularly enjoy the outdoor dining.	Excellent spot to spend time alone or talk business.	And secondly the Lounge, where you can just a get a drink and enjoy the view.	üòãüòã Good cozy place with decent food and drinks	It's a nice place to go during the day with your children.	OUTSIDE OF THIS SMALL PLACE IS A GOOD AREA TO EAT....	Well, on this occasion I reserved a night just to wait and get there and	A great place for a meal or just cocktails and a view.
I'm taking someone on a date. Shellfish makes me itch.	I prefer a more romantic place. I prefer a more allergy-friendly place.	For dinner, I enjoyed the scallops one night and the sea bass the second.	Both lobster bisque and steak were little salty for me but overall great food and nice that they were served hot!	Everything delicious with an exception of the shrimps.	Overall a great place for a date or a family dinner.	Nice place for a date night.	A great place for a meal or just cocktails and a view.												Overall a great place for a date or a family dinner.	Nice place for a date night.	An excellent place to grab a cocktail or an after dinner desert and people watch!	I definitely recommend this place if view and good cocktails is something that you desire.	Perfect place to go just with friends or that first date you have to try the barbecue pineapple.	The cozy and fancy decoration is good for dating or business.	OUTSIDE OF THIS SMALL PLACE IS A GOOD AREA TO EAT....	A great place for a meal or just cocktails and a view.	üòãüòã Good cozy place with decent food and drinks	This is a great place for friends or a cute date night.	And secondly the Lounge, where you can just a get a drink and enjoy the view.	Not only offers a romantic vibe and delicious food for special occasions but also welcomes you for a casual date night at the bar where you can enjoy the view and desserts!	elegant, upscale and classy place for a special occasion.	The place is extremely crowded and noisy - not a place for a romantic dinner :))	Very nice place to relax have a cocktail and apitizers.
Spicy food is flavourful but I often have a bad reaction. I love trying new cuisines from other cultures around the world.	I prefer mild food. I prefer a place that serves food from a specific culture/country.	I grew up on the east coast eating a lot of good Italian food both in restaurants and homemade by family.	I've had at other high class restaurants, but the chimichurri and sun dried tomato puree that accompanied	Chinese food here - super tasty.	Superior restaurant, the only place I will have the dim sum.	Great food but service can be better.	Everything in the buffet is always high quality, has great flavor and a good amount of heat.												Superior restaurant, the only place I will have the dim sum.	Great food but service can be better.	A good authentic restaurant with decent inside decor.	One of my top places for tasty quality meals.	Food is good, open late and a drive thru !!	but it is fine dining Very good restaurants for meat lovers, you can choose from all kinds of steaks.	Quality food at a more than reasonable price.	Everything in the buffet is always high quality, has great flavor and a good amount of heat.	Good food in a relaxed atmosphere.	But menu is just beautiful and food is great too.	Food, service and ambiance are great!	Excellent portions, fresh ingredients and a solid mainstream selection of things to taste.	I go to fabulous restaurants on a regular basis, Michelin stars, Top Chef, etc, so food wise, excellent of course.	The menu is concise, the prices are high and the portions are modest, but the quality is excellent.	Food is great but this place stands above the rest because of the homemade red salsa .
We're trying to eat on a budget. I'm allergic to shellfish.	I prefer a more affordable place. I prefer not to eat shellfish.	Everything delicious with an exception of the shrimps.	a little pricey with some dishes better than others.	Good food for cheap.	Good seafood selection.	A little more pricey than the typical dinner spot, but the location and service are worth it.	Really nice restaurant if you want to eat some excellent meats.												Good seafood selection.	A little more pricey than the typical dinner spot, but the location and service are worth it.	One of my preferred places for tasty Quality Meals.	Burger, Halibut Bouillabaisse, and sushi are all fantastic Very good breakfast food and service.	The price is amazing for the quality of food you get.	but it is fine dining Very good restaurants for meat lovers, you can choose from all kinds of steaks.	The prices are high but appropriate; overall, I rate this restaurant as a good value for fine dining, perfect for a business dinner or special occasion.	Really nice restaurant if you want to eat some excellent meats.	But it was plenty to satisfy a craving for grilled meats, and I would come back if the dinner prices were a little cheaper.	Quality food at a more than reasonable price.	Great food at a reasonable price.	Great place for quality meals.	Superior restaurant, the only place I will have the dim sum.	Would not be my top sashimi restaurant, but for the convenience, it was worth it.	Sushi quality is high and real, fresh fish.
I'm not in the mood for burgers. It looks like a loud setting.	I prefer a fancier place. I prefer a more intimate setting.	were truly from the smoker, and they had the feel of mostly grilled ribs to me, which I do not like.	Good price on the burgers, sodas are a bit too much.	The bun melts in your mouth and blends perfectly with the meat patty and any extras.	elegant, upscale and classy place for a special occasion.	A great place for a meal or just cocktails and a view.	And secondly the Lounge, where you can just a get a drink and enjoy the view.												elegant, upscale and classy place for a special occasion.	A great place for a meal or just cocktails and a view.	Lastly, the bar area was very inviting and relaxing.	An excellent place to grab a cocktail or an after dinner desert and people watch!	we were there for a romantic evening and to feel pampered and	Great place for a special dinner, room for a medium size crowd.	üòãüòã Good cozy place with decent food and drinks	And secondly the Lounge, where you can just a get a drink and enjoy the view.	Overall a great place for a date or a family dinner.	The cozy and fancy decoration is good for dating or business.	Nice place for a date night.	In good weather, I particularly enjoy the outdoor dining.	Not only offers a romantic vibe and delicious food for special occasions but also welcomes you for a casual date night at the bar where you can enjoy the view and desserts!	The place is extremely crowded and noisy - not a place for a romantic dinner :))	Great ambiance - felt like a lounge more than a restaurant.
A good Merlot makes the meal better. I won't eat it if it's too hot.	I prefer wine over beer. I prefer milder food.	My French Martini was outstanding.	Love me a great Malbec and ribeye and this hit the spot!	The cocktail was mixed perfectly, nicely balanced and attractively garnished.	Food is good and wine is OK.	Excellent drinks , just okay food.	I had the steak and eggs with a dark and stormy since I love rum.												Food is good and wine is OK.	Excellent drinks , just okay food.	My cocktail was delicious as well.	The cocktail was mixed perfectly, nicely balanced and attractively garnished.	The wine selections are plentiful and the food I quite exquisite.	The food was delicious and tasted great with my wine	Indians just one suggestion have a very mild beer, their strong beers tend to be very bitter, u might not enjoy them	I had the steak and eggs with a dark and stormy since I love rum.	Wine, caipirinha, and a desert.	Fantastic steaks and wine.	Wine pairing was helpfully suggested.	I started with the Moscow Mule - sobieski vodka, angostura bitters, ginger beer.	Delicious but also more of a brunch type of drink.	Love me a great Malbec and ribeye and this hit the spot!	The house wine is good.
Fast food makes me feel depressed. It looks like a loud setting.	I prefer something healthier. I prefer a more intimate setting.	Food is so good and feels like I'm eating healthy even of	Good price on the burgers, sodas are a bit too much.	But menu is just beautiful and food is great too.	I also enjoy going to the Spa Before Dinner.	we were there for a romantic evening and to feel pampered and	I enjoyed the excellent vibes and yummy dishes and drinks.												I also enjoy going to the Spa Before Dinner.	we were there for a romantic evening and to feel pampered and	Not only offers a romantic vibe and delicious food for special occasions but also welcomes you for a casual date night at the bar where you can enjoy the view and desserts!	That plus a perfectly cooked steak makes this a great night out for any occasion.	In fact all four of us enjoyed each of our varying meals.	Good for family dinner or dinner with office colleagues.	Food is very nicely prepared and presented.	I enjoyed the excellent vibes and yummy dishes and drinks.	Food is delicious and dessert is a bonus!	In good weather, I particularly enjoy the outdoor dining.	both delish	Good for unhurried and enjoyable small or medium-sized group dinner.	We enjoy to go out.	Food is absolutely delicious and there are so many choices!	We come here with friends always when we feel like eating something gorgeous!
I don't really like red meat. I don't like spending much money.	I prefer chicken or fish. I prefer a cheap place.	Yes a good steak is expensive!	I only eat Beef Brisket here because is delicious!	But it was plenty to satisfy a craving for grilled meats, and I would come back if the dinner prices were a little cheaper.	Burger, Halibut Bouillabaisse, and sushi are all fantastic Very good breakfast food and service.	Superior restaurant, the only place I will have the dim sum.	On the pricier side and decently fresh.												Burger, Halibut Bouillabaisse, and sushi are all fantastic Very good breakfast food and service.	Superior restaurant, the only place I will have the dim sum.	Great place to go to for a great meal.	One of my top places for tasty quality meals.	The price is amazing for the quality of food you get.	Great food at a reasonable price.	A little more pricey than the typical dinner spot, but the location and service are worth it.	On the pricier side and decently fresh.	I always get the chicken flautas entree, garlic shrimp tacos and the cheese	Great place for quality meals.	Their steaks and lamb are also worth it.	Had the burger and the shrimp pasta, both good value.	For Indian food in the downtown area, I think this place has the best value.	Our first choice has been the Thai Chili Chicken, White Chili Chicken... and the list goes on!	Quality food at a more than reasonable price.
That's junk food. Let's keep it within a certain price range.	I prefer healthier food. I prefer a more expensive place.	Quality food at a more than reasonable price.	Great food at a reasonable price.	But it was plenty to satisfy a craving for grilled meats, and I would come back if the dinner prices were a little cheaper.	Quality food at a more than reasonable price.	The price is amazing for the quality of food you get.	the food is just as good.												Quality food at a more than reasonable price.	The price is amazing for the quality of food you get.	But it was plenty to satisfy a craving for grilled meats, and I would come back if the dinner prices were a little cheaper.	Price is good, food is great	One of my top places for tasty quality meals.	Consistently good food!	Superior restaurant, the only place I will have the dim sum.	the food is just as good.	But menu is just beautiful and food is great too.	Food is absolutely delicious and there are so many choices!	I‚Äôve been a customer for 8 years now, good food for decent prices.	Great place for quality meals.	I just love their food.	Great food but service can be better.	Great food at a reasonable price.
I'm pescatarian. The food is usually cold there.	I prefer fish. I prefer steaming hot food.	I only eat Beef Brisket here because is delicious!	delicious steaks and seafood...	Well prepared and delicious Indian food (I ate vegetarian food).	Everything delicious with an exception of the shrimps.	Fish tacos are so good, sauce is very hot	delicious steaks and seafood...												Everything delicious with an exception of the shrimps.	Fish tacos are so good, sauce is very hot	Best thing was actually the salmon with capers.	Burger, Halibut Bouillabaisse, and sushi are all fantastic Very good breakfast food and service.	For entree, I had the Beer Battered Fish & Chips - true cod, union secret sauce, sea salt, kennebec fries.	I found that I do not enjoy tuna, but my mom thought it was excellent.	Calamari is just good for liquor snacks, but it's too much to share with the family.	delicious steaks and seafood...	My favorite dish is the Pappardelle Pasta with the tomato basil sauce.	Both lobster bisque and steak were little salty for me but overall great food and nice that they were served hot!	For dinner, I enjoyed the scallops one night and the sea bass the second.	I selected the pasta option minus the seafood.	I liked my red velvet martini, and the calamari.	Sushi quality is high and real, fresh fish.	All were excellent, but the salmon was really something special: perfectly cooked so that it was still tender and moist, topped with crab and bernaise, on a bed of mashed celeriac.
I always feel good about plant based. That's a terrible deal.	I prefer plant based cuisine. I prefer a place with a better price-quality ratio.	Yes, prices are a little bit high, but let's be honest, worth it!	However , the price is relatively high .	Excellent prices.	Indian Garden is one of my favorite restaurants.	Farmers has always been one of my favorite restaurants in the area!	I love Indian Garden and dine there whenever I'm in the area.												Indian Garden is one of my favorite restaurants.	Farmers has always been one of my favorite restaurants in the area!	but it is fine dining Very good restaurants for meat lovers, you can choose from all kinds of steaks.	I go to fabulous restaurants on a regular basis, Michelin stars, Top Chef, etc, so food wise, excellent of course.	Food is great but this place stands above the rest because of the homemade red salsa .	The price is amazing for the quality of food you get.	A good authentic restaurant with decent inside decor.	I love Indian Garden and dine there whenever I'm in the area.	One of my top places for tasty quality meals.	Food is always great...lot of variety in veg and non	One of my preferred places for tasty Quality Meals.	i've ever had but provides variety compared to Naf naf and Roti	Quality food at a more than reasonable price.	I love the food best gyro, kitchen rotisserie is my best and with a spinach salad on the side yummyy :)	Great place for quality meals.
I'm a fan of lighter food. Spices don't agree with me.	I prefer a place that serves lighter food. I prefer a more mild dish.	But I‚Äôm not a BBQ aficionado	My broccoli was cool in temp, medallions great cook and flavor, but only warm in temp, salad had too much dressing.	Seasoning was light to let the fresh ingredients shine.	Everything in the buffet is always high quality, has great flavor and a good amount of heat.	Superior restaurant, the only place I will have the dim sum.	I always get the chicken flautas entree, garlic shrimp tacos and the cheese												Everything in the buffet is always high quality, has great flavor and a good amount of heat.	Superior restaurant, the only place I will have the dim sum.	The food here is very good like how you can get whatever toppings you want on your gyro without an extra charge.	Great place for quality meals.	The Lasagna is just amazing and is the food I order the most.	quality meals and the setting at this place is excellent.	One of my preferred places for tasty Quality Meals.	I always get the chicken flautas entree, garlic shrimp tacos and the cheese	Food is good, open late and a drive thru !!	Great food but service can be better.	I always order tacos and rice.	Food, service and ambiance are great!	One of my top places for tasty quality meals.	4 stars only because I've had a way better, gourmet burger elsewhere for the price.	I love the food best gyro, kitchen rotisserie is my best and with a spinach salad on the side yummyy :)
It's a little too spicy for me. Portions are too large.	I prefer a milder food. I prefer a place with smaller portions.	Some bites were good, the sauce had a nice flavor, but the ribs overall were far too dry.	Tasted awesome, the sauce was quite heavy, would have been good with a lighter lemony sauce.	Servings are on the small side but very good.	Everything in the buffet is always high quality, has great flavor and a good amount of heat.	Superior restaurant, the only place I will have the dim sum.	But menu is just beautiful and food is great too.												Everything in the buffet is always high quality, has great flavor and a good amount of heat.	Superior restaurant, the only place I will have the dim sum.	Food is good, open late and a drive thru !!	Food is absolutely delicious and there are so many choices!	I always get the chicken flautas entree, garlic shrimp tacos and the cheese	4 stars only because I've had a way better, gourmet burger elsewhere for the price.	Wide selection of food, but not overwhelming.	But menu is just beautiful and food is great too.	Excellent portions, fresh ingredients and a solid mainstream selection of things to taste.	Quality food at a more than reasonable price.	I went for a lunch buffet and they had wide variety in the buffet menu.	I order medium well.	Food is delicious and portions are huge!	Great food but service can be better.	Smaller portions, but very tasty
I can't afford fancy food. I have like $10 to spend.	I prefer cheap, affordable food. I prefer a less expensive place.	Good food for cheap.	a little pricey with some dishes better than others.	But it was plenty to satisfy a craving for grilled meats, and I would come back if the dinner prices were a little cheaper.	Quality food at a more than reasonable price.	The price is amazing for the quality of food you get.	Great food at a reasonable price.												Quality food at a more than reasonable price.	The price is amazing for the quality of food you get.	Superior restaurant, the only place I will have the dim sum.	A little more pricey than the typical dinner spot, but the location and service are worth it.	But menu is just beautiful and food is great too.	Very small place, but the food is great and the prices are affordable.	The food is delicious, the price is reasonable.	Great food at a reasonable price.	But it was plenty to satisfy a craving for grilled meats, and I would come back if the dinner prices were a little cheaper.	Price is good, food is great	Great food at great prices.	Great place for quality meals.	I‚Äôve been a customer for 8 years now, good food for decent prices.	The place serves large portions and for affordable prices.	I go here whenever I want something Good, filling, and great price..
That's a terrible deal. I'm not eating Bambi.	I prefer a place with a better price-quality ratio. I prefer vegetarian cuisine.	Yes a good steak is expensive!	I got a dinky little steak and the smallest lobster tail ever for $56.	She said that it was the best steak ever!	but it is fine dining Very good restaurants for meat lovers, you can choose from all kinds of steaks.	Great place for quality meals.	Superior restaurant, the only place I will have the dim sum.												but it is fine dining Very good restaurants for meat lovers, you can choose from all kinds of steaks.	Great place for quality meals.	Quality food at a more than reasonable price.	Great place to go to for a great meal.	But menu is just beautiful and food is great too.	Great food at a reasonable price.	For Indian food in the downtown area, I think this place has the best value.	Superior restaurant, the only place I will have the dim sum.	One of my preferred places for tasty Quality Meals.	Had good vegetarian options as well.	Really nice restaurant if you want to eat some excellent meats.	One of my top places for tasty quality meals.	Such a great selection of vegetarian & vegan options too!	Large selection of vegetarian and non-vegetarian meals.	Wow, a wonderful upscale place with exceptional quality meats, great atmosphere and service
My mother had to bribe me to eat vegetables as a kid. I'd like to make a better impression on my date.	I prefer meat. I prefer a place that is fancier.	Took my daughter for a birthday lunch.	The 'vegetable plate' we had was delicious with very fresh bok choy.	My partner had the minestrone soup and huge side salad.	I only eat Beef Brisket here because is delicious!	but it is fine dining Very good restaurants for meat lovers, you can choose from all kinds of steaks.	The food was excellent, I like my steak												I only eat Beef Brisket here because is delicious!	but it is fine dining Very good restaurants for meat lovers, you can choose from all kinds of steaks.	However nothing out here compares to the meats you get in Texas - some of the meats served	I order medium well.	Delicious sirloin and great selection of sides.	My preferred location for delicious Burgers.	Steaks were cooked perfect to our liking.	The food was excellent, I like my steak	I'll keep this short n sweet..AMAZING place if you want to grub on all kinds of meat..	Food is absolutely delicious and there are so many choices!	The meat is absolutely delicious, awesomely seasoned and beautifully cooked.	My favorite selections are the Steak Tartare and the Lamb Chops.	Really nice restaurant if you want to eat some excellent meats.	delicious steaks and seafood...	Meat was well seasoned and well cooked.
Fine dining is not my preference. I've never tried sushi.	I prefer casual dining. I prefer a more familiar cuisine.	It may have literally been the best sushi I have ever had.	The sushi was fair but not very special and the menu looked very standard.	Would not be my top sashimi restaurant, but for the convenience, it was worth it.	I go to fabulous restaurants on a regular basis, Michelin stars, Top Chef, etc, so food wise, excellent of course.	Superior restaurant, the only place I will have the dim sum.	In good weather, I particularly enjoy the outdoor dining.												I go to fabulous restaurants on a regular basis, Michelin stars, Top Chef, etc, so food wise, excellent of course.	Superior restaurant, the only place I will have the dim sum.	Food is good, lots of choices at the salad bar.	I went for a lunch buffet and they had wide variety in the buffet menu.	The place is extremely crowded and noisy - not a place for a romantic dinner :))	A good selection of specials for appetizers or entrees always keeps it interesting.	Good for unhurried and enjoyable small or medium-sized group dinner.	In good weather, I particularly enjoy the outdoor dining.	Good food in a relaxed atmosphere.	In recent memory, I can truly say I have not had a better dining experience.	The restaurant has a great view and both choices of food were simply delicious and sophisticated.	It was by far my favorite Italian cuisine compared to the other three	The buffet is excellent with a good combination of meat/vegetarian dishes as well as spicy/non-spicy options.	But menu is just beautiful and food is great too.	It was a classy restaurant with great food varieties.
I'm in the mood for pizza. It looks like a loud setting.	I prefer a more Italian cuisine. I prefer a more intimate setting.	We enjoyed the deep dish pizza, it is delicious.	Pizza came out warm.	Delicious DISH PIZZA!	It was by far my favorite Italian cuisine compared to the other three	Italian food Good portion, great music and a good place to go for a romantic date Always a great italian classic!	It was one of my favorite Italian dishes I‚Äôve ever tried.												It was by far my favorite Italian cuisine compared to the other three	Italian food Good portion, great music and a good place to go for a romantic date Always a great italian classic!	My favorite dish is the Pappardelle Pasta with the tomato basil sauce.	Great, old style Italian food with excellent service from the front door all the way through dessert.	An Italian restaurant with great atmosphere and food One of my favorite italian places in the heart of Chicago.	The pitas that come with the meals are warm and soft.	We've also dined here for lunch and thre chicken parmesan	It was one of my favorite Italian dishes I‚Äôve ever tried.	I grew up on the east coast eating a lot of good Italian food both in restaurants and homemade by family.	Great food with traditional Italian favorites as well as some more inventive menu items.	I really love the Greek salad here with lamb and beef meat.	The best Italian food I've had in Chicago, so far.	Best Italian food!	Delicious and a wide variety of dishes.	I've had at other high class restaurants, but the chimichurri and sun dried tomato puree that accompanied
I don't mind expensive as long as you get a lot for your money. I am pretty picky about what Asian foods I eat.	I prefer more value for my money. I prefer Italian, French, Spanish foods.	The price is amazing for the quality of food you get.	Chinese food here - super tasty.	Quality food at a more than reasonable price.	It was by far my favorite Italian cuisine compared to the other three	I grew up on the east coast eating a lot of good Italian food both in restaurants and homemade by family.	Best Italian food!												It was by far my favorite Italian cuisine compared to the other three	I grew up on the east coast eating a lot of good Italian food both in restaurants and homemade by family.	I always order tacos and rice.	and you want some good Mexican food	My favorite dish is the Pappardelle Pasta with the tomato basil sauce.	Greek food, mmm, awesome.	Good food for cheap.	Best Italian food!	Great food with traditional Italian favorites as well as some more inventive menu items.	Pasta and sauce really exceed my expectations for the Price!	I really love the Greek salad here with lamb and beef meat.	Always amazing, high quality and real Mexican cuisine.	I always get the chicken flautas entree, garlic shrimp tacos and the cheese	The best Italian food I've had in Chicago, so far.	Both are delicious, I loved the tzatziki sauce and the orzo pasta.
I'm not a big meat eater. I only eat fast food when nothing else is available.	I prefer vegetarian cuisine. I prefer to eat better food.	I'm vegan for health reasons.	I only eat Beef Brisket here because is delicious!	The Impossible Burger is the best vegetarian burger I have ever had.	I'm vegan for health reasons.	I only eat Beef Brisket here because is delicious!	Well prepared and delicious Indian food (I ate vegetarian food).												I'm vegan for health reasons.	I only eat Beef Brisket here because is delicious!	For instance, they could use a few more vegetarian options.	Such a great selection of vegetarian & vegan options too!	I am a huge fan of steaks, so i love coming here for my month protein.	delicious steaks and seafood...	Had good vegetarian options as well.	Well prepared and delicious Indian food (I ate vegetarian food).	Food is always great...lot of variety in veg and non	Food is absolutely delicious and there are so many choices!	Lamb and beef plate is great, I get that with hummus veggies and rice.	but it is fine dining Very good restaurants for meat lovers, you can choose from all kinds of steaks.	Large selection of vegetarian and non-vegetarian meals.	I love love love Indian food and have tested plenty of restaurants.	I really love the Greek salad here with lamb and beef meat.
Anything slow-cooked or grilled is delicious. I don't like curry.	I prefer beef, chicken, lamb, pork, etc. I prefer Italian or Chinese.	Lamb and beef plate is great, I get that with hummus veggies and rice.	Everything delicious with an exception of the shrimps.	I only eat Beef Brisket here because is delicious!	Lamb and beef plate is great, I get that with hummus veggies and rice.	I really love the Greek salad here with lamb and beef meat.	My favorite selections are the Steak Tartare and the Lamb Chops.												Lamb and beef plate is great, I get that with hummus veggies and rice.	I really love the Greek salad here with lamb and beef meat.	lamb gyro all the way.	It was by far my favorite Italian cuisine compared to the other three	we‚Äôve had some warm bread with butter, young roasted chicken with beans, smoked octopus with hummus and a very soft baked chicken breast,with some pickled onions and mushrooms.	The lamb burgers are huge and yummy and served with tzatziki.	Well prepared and delicious Indian food (I ate vegetarian food).	My favorite selections are the Steak Tartare and the Lamb Chops.	Chicken, lamb, pork and so many cuts of beef that you will easily find the one you love.	Our first choice has been the Thai Chili Chicken, White Chili Chicken... and the list goes on!	I always get the chicken flautas entree, garlic shrimp tacos and the cheese	My favorite dish is the Pappardelle Pasta with the tomato basil sauce.	I only eat Beef Brisket here because is delicious!	Chinese food here - super tasty.	Turkey burger and fries, both very tasty!
I prefer more vegetarian options. I don't like booth seating.	I prefer that the menu has more options for vegetarians. I prefer a table.	Social distance seating was excellent, actually made for a much less hectic experience than most steak places.	I usually order to-go, but there is indoor seating if you prefer to dine-in (as of 10/20, although capacity is reduced due to COVID)	Bit they have outdoor seating and its comfortable Great place for dinner.	Menu is simple but well done, they welcome substitutions and portion size changes.	Large selection of vegetarian and non-vegetarian meals.	Such a great selection of vegetarian & vegan options too!												Menu is simple but well done, they welcome substitutions and portion size changes.	Large selection of vegetarian and non-vegetarian meals.	I really love the Greek salad here with lamb and beef meat.	I love their bread and their extensive menu.	They have vegan options, fresh produce, an interesting, ever-changing menu selection, and the most fabulous Mac and Cheese.	The menu does not offer a lot of things and mostly offers steaks and chicken courses.	Really nice restaurant if you want to eat some excellent meats.	Such a great selection of vegetarian & vegan options too!	but it is fine dining Very good restaurants for meat lovers, you can choose from all kinds of steaks.	But menu is just beautiful and food is great too.	Had good vegetarian options as well.	Superior restaurant, the only place I will have the dim sum.	I love the food best gyro, kitchen rotisserie is my best and with a spinach salad on the side yummyy :)	Great meat and salad options!	For instance, they could use a few more vegetarian options.
I'm not a fan of chicken wings. I'd rather walk the path less traveled.	I prefer other appetizers. I prefer a more intimate and cozy place.	But I eat here once and a while staring my commute home.	Very greasy chicken but burgers were excellent!!!	Great burgers and great chicken strips.	The pitas that come with the meals are warm and soft.	I had a few of the happy hour appetizers and they were fantastic.	Good for unhurried and enjoyable small or medium-sized group dinner.												The pitas that come with the meals are warm and soft.	I had a few of the happy hour appetizers and they were fantastic.	We've also dined here for lunch and thre chicken parmesan	Appetizers were also delicious!	The seafood tower is great as well and a perfect appetizer for groups of four or more.	The restaurant has a great view and both choices of food were simply delicious and sophisticated.	It is a wonderful dining experience!	Good for unhurried and enjoyable small or medium-sized group dinner.	I always get the chicken flautas entree, garlic shrimp tacos and the cheese	Appetizers were great and the pizza was the best	All the sides are delicious and large enough to share.	In good weather, I particularly enjoy the outdoor dining.	We started with appetizers, our choice was crab legs, oysters, shrimp, smoked salmon and Blue cheese.	Overall a great place for a date or a family dinner.	The buffet is excellent with a good combination of meat/vegetarian dishes as well as spicy/non-spicy options.
It looks like a loud setting. I am no match for spicy food.	I prefer a more intimate setting. I prefer mild food.	Food is great but this place stands above the rest because of the homemade red salsa .	Tasted awesome, the sauce was quite heavy, would have been good with a lighter lemony sauce.	Dim sum is excellent, main course - chicken - was not as spicey as I thought.	Good for unhurried and enjoyable small or medium-sized group dinner.	Not only offers a romantic vibe and delicious food for special occasions but also welcomes you for a casual date night at the bar where you can enjoy the view and desserts!	I enjoyed the excellent vibes and yummy dishes and drinks.												Good for unhurried and enjoyable small or medium-sized group dinner.	Not only offers a romantic vibe and delicious food for special occasions but also welcomes you for a casual date night at the bar where you can enjoy the view and desserts!	Food is very nicely prepared and presented.	We started with appetizers, our choice was crab legs, oysters, shrimp, smoked salmon and Blue cheese.	Everything was fresh and flavorful .	Everything in the buffet is always high quality, has great flavor and a good amount of heat.	Although it was the least favorite dish of the night, I still liked it with the small pieces of bacon.	I enjoyed the excellent vibes and yummy dishes and drinks.	In fact all four of us enjoyed each of our varying meals.	Food is delicious and dessert is a bonus!	Everything was fresh, flavorful and had perfect presentation.	Delicious and a wide variety of dishes.	Good food in a relaxed atmosphere.	Food is absolutely delicious and there are so many choices!	In good weather, I particularly enjoy the outdoor dining.
I don't like curry. Fast food isn't my first choice.	I prefer Italian or Chinese. I prefer a fancier place.	Dim sum is excellent, main course - chicken - was not as spicey as I thought.	I love love love Indian food and have tested plenty of restaurants.	I only eat Beef Brisket here because is delicious!	It was by far my favorite Italian cuisine compared to the other three	Great food with traditional Italian favorites as well as some more inventive menu items.	Italian food Good portion, great music and a good place to go for a romantic date Always a great italian classic!												It was by far my favorite Italian cuisine compared to the other three	Great food with traditional Italian favorites as well as some more inventive menu items.	I highly recommend Shanghai Terrace over TAO or any hi end Chinese restaurant in the city.	Chinese food here - super tasty.	I go to fabulous restaurants on a regular basis, Michelin stars, Top Chef, etc, so food wise, excellent of course.	Greek food and the atmosphere here is quality.	Brazilian food and the atmosphere at this place is excellent.	Italian food Good portion, great music and a good place to go for a romantic date Always a great italian classic!	Superior restaurant, the only place I will have the dim sum.	Great, old style Italian food with excellent service from the front door all the way through dessert.	I grew up on the east coast eating a lot of good Italian food both in restaurants and homemade by family.	An Italian restaurant with great atmosphere and food One of my favorite italian places in the heart of Chicago.	With so many Italian restaurant choices in the area, so glad we went here.	My go-to place for fast Greek food!	The best Italian food I've had in Chicago, so far.
I'm a fan of lighter food. I don't mind expensive as long as you get a lot for your money.	I prefer a place that serves lighter food. I prefer more value for my money.	You definitely get your money's worth of options and food quantity!	Food is definitely worth the money!	The price is amazing for the quality of food you get.	The price is amazing for the quality of food you get.	Quality food at a more than reasonable price.	Superior restaurant, the only place I will have the dim sum.												The price is amazing for the quality of food you get.	Quality food at a more than reasonable price.	I go here whenever I want something Good, filling, and great price..	Great place for quality meals.	Food, service and ambiance are great!	But it was plenty to satisfy a craving for grilled meats, and I would come back if the dinner prices were a little cheaper.	Great food at a reasonable price.	Superior restaurant, the only place I will have the dim sum.	Great food but service can be better.	Everything in the buffet is always high quality, has great flavor and a good amount of heat.	I‚Äôve been a customer for 8 years now, good food for decent prices.	The place serves large portions and for affordable prices.	It's plenty of restaurants around the Water Tower Place that will gladly take my money, with a smile and good customer service M Burger	4 stars only because I've had a way better, gourmet burger elsewhere for the price.	Food is good, open late and a drive thru !!
It doesn't look kid-friendly. Booth seating would be more comfortable.	I prefer a place that is kid friendly. I prefer bench seating.	Their outdoor seating is informal and good for young folks.	Spendy and could be a more relaxed atmosphere.	Outdoor seating available.	Their outdoor seating is informal and good for young folks.	Bit they have outdoor seating and its comfortable Great place for dinner.	And secondly the Lounge, where you can just a get a drink and enjoy the view.												Their outdoor seating is informal and good for young folks.	Bit they have outdoor seating and its comfortable Great place for dinner.	Great location with very nice outdoor seating.	I usually order to-go, but there is indoor seating if you prefer to dine-in (as of 10/20, although capacity is reduced due to COVID)	It's a nice place to go during the day with your children.	Outdoor seating available.	A great place for happy hour and lunch.	And secondly the Lounge, where you can just a get a drink and enjoy the view.	Great place for a special dinner, room for a medium size crowd.	Social distance seating was excellent, actually made for a much less hectic experience than most steak places.	It's a lovely place with outdoor seating.	It was also very kid friendly and I went with my little cousins, which was great!	This place has a lovely outdoor seating.	This is a 4 star, casual, kid-friendly place for Brazilian food and steaks with good parking options which also serves alcohol.	A great place for a meal or just cocktails and a view.
I don't eat meat. I'm on a tight budget.	I prefer a vegetarian restaurant. I prefer a place that's more affordable.	Yes a good steak is expensive!	I'm vegan for health reasons.	But it was plenty to satisfy a craving for grilled meats, and I would come back if the dinner prices were a little cheaper.	but it is fine dining Very good restaurants for meat lovers, you can choose from all kinds of steaks.	Really nice restaurant if you want to eat some excellent meats.	Such a great selection of vegetarian & vegan options too!												but it is fine dining Very good restaurants for meat lovers, you can choose from all kinds of steaks.	Really nice restaurant if you want to eat some excellent meats.	I love Indian Garden and dine there whenever I'm in the area.	Wonderful chain steak house with consistent quality of food and service.	Great food at a reasonable price.	A little more pricey than the typical dinner spot, but the location and service are worth it.	The price is amazing for the quality of food you get.	Such a great selection of vegetarian & vegan options too!	Large selection of vegetarian and non-vegetarian meals.	Superior restaurant, the only place I will have the dim sum.	Great place for quality meals.	Quality food at a more than reasonable price.	The prices are high but appropriate; overall, I rate this restaurant as a good value for fine dining, perfect for a business dinner or special occasion.	For Indian food in the downtown area, I think this place has the best value.	Had good vegetarian options as well.
It's a little late for breakfast. I eat like a bird.	I prefer lunch or brunch. I prefer smaller portions.	I could have eaten it all night.	Went early for lunch to beat the rush.	sometimes the chicken can be weird	Smaller portions, but very tasty	Good for unhurried and enjoyable small or medium-sized group dinner.	You can either choose a pita, a bowl, or a salad with your choice of protein, as well as toppings.												Smaller portions, but very tasty	Good for unhurried and enjoyable small or medium-sized group dinner.	lunch buffet is amazing as well!	Great coffee, salads and breakfast.	I always get the chicken flautas entree, garlic shrimp tacos and the cheese	Would suggest if dinning with 2 people get a small we got a medium between 2 people and it was alot, good but alot.	I usually order to-go, but there is indoor seating if you prefer to dine-in (as of 10/20, although capacity is reduced due to COVID)	You can either choose a pita, a bowl, or a salad with your choice of protein, as well as toppings.	Large enough for two meals!	Food is delicious and portions are huge!	I always order tacos and rice.	Servings are on the small side but very good.	I usually just get one or two drinks and either a dessert or a appetizer (because of the cost) but the view is out of the world!	I love the food best gyro, kitchen rotisserie is my best and with a spinach salad on the side yummyy :)	I went for a lunch buffet and they had wide variety in the buffet menu.
I don't really like red meat. My body is a temple.	I prefer chicken or fish. I prefer a lighter meal.	I only eat Beef Brisket here because is delicious!	I'm vegan for health reasons.	I am a huge fan of steaks, so i love coming here for my month protein.	I always get the chicken flautas entree, garlic shrimp tacos and the cheese	I always order tacos and rice.	I had the steak and eggs with a dark and stormy since I love rum.												I always get the chicken flautas entree, garlic shrimp tacos and the cheese	I always order tacos and rice.	I love the food best gyro, kitchen rotisserie is my best and with a spinach salad on the side yummyy :)	That plus a perfectly cooked steak makes this a great night out for any occasion.	Turkey burger and fries, both very tasty!	Although it was the least favorite dish of the night, I still liked it with the small pieces of bacon.	My favorite selections are the Steak Tartare and the Lamb Chops.	I had the steak and eggs with a dark and stormy since I love rum.	Lamb and beef plate is great, I get that with hummus veggies and rice.	My favorite dish is the Pappardelle Pasta with the tomato basil sauce.	Chicken flautas are always delish.	Our first choice has been the Thai Chili Chicken, White Chili Chicken... and the list goes on!	I had the salmon with lentil rice pilaf and grilled veggies.	lamb gyro all the way.	grilled chicken with avocado and bacon.......soooo yummy.
I have a standing date with my niece on Saturdays. Most of the time I don't eat any fish or meat.	I prefer the place to be family friendly on Saturdays. I prefer a vegetarian place.	Well prepared and delicious Indian food (I ate vegetarian food).	We started with appetizers, our choice was crab legs, oysters, shrimp, smoked salmon and Blue cheese.	For lunch, my boyfriend and I shared the boneless chicken bites appetizer and a small deep dish pizza, which was more than enough food for the two of us (with plenty of leftovers, which made for a quick, yummy breakfast in the hotel the next morning before we headed out of town).	I love Indian Garden and dine there whenever I'm in the area.	Farmers has always been one of my favorite restaurants in the area!	Really nice restaurant if you want to eat some excellent meats.												I love Indian Garden and dine there whenever I'm in the area.	Farmers has always been one of my favorite restaurants in the area!	quality meals and the setting at this place is excellent.	Quality of the food is fantastic, and I recommend this place to all my closest friends!	Food is good, lots of choices at the salad bar.	Great place to go to for a great meal.	Had good vegetarian options as well.	Really nice restaurant if you want to eat some excellent meats.	Food, service and ambiance are great!	but it is fine dining Very good restaurants for meat lovers, you can choose from all kinds of steaks.	Bit they have outdoor seating and its comfortable Great place for dinner.	Overall a great place for a date or a family dinner.	The ambiance, foods and hosts are excellent!	Such a great selection of vegetarian & vegan options too!	Great place for quality meals.
I can't stand anything spicy. I'm craving some sushi.	I prefer mild cuisine. I prefer Japanese cuisine.	Chinese food here - super tasty.	Fish tacos are so good, sauce is very hot	Everything delicious with an exception of the shrimps.	Chinese food here - super tasty.	Relative to Chinese food, it's fantastic.	Chinese food... excellent.												Chinese food here - super tasty.	Relative to Chinese food, it's fantastic.	I love love love Indian food and have tested plenty of restaurants.	Real authentic Indian food, no cheesy Bollywood decor Tastefully decorated, the restaurant immediately feels authentic when you step inside.	the 'Shanghai three fried rice' were all wonderful.	Sushi quality is high and real, fresh fish.	The food was delicious and so satisfying - I particularly enjoyed the Korean Fried Cauliflower.	Chinese food... excellent.	Everything delicious with an exception of the shrimps.	It was by far my favorite Italian cuisine compared to the other three	Delicious and a wide variety of dishes.	Fantastic perfectly executed high end Chinese food.	It may have literally been the best sushi I have ever had.	The food was good overall, we enjoy Asian food and this hit the spot.	My favorite dish is the Pappardelle Pasta with the tomato basil sauce.
That steak is overcooked. I hate when it's too loud.	I prefer my steak medium rare. I prefer a quieter place	One thing that impressed me most was an instance where my steak was overcooked.	Steak is like butter!	my meal was just as I requested, seasoned perfectly, steak cooked exactly right.	The food was excellent, I like my steak	Steak was seasoned just the way I like it and a perfect medium rare to rare like requested.	I only eat Beef Brisket here because is delicious!												The food was excellent, I like my steak	Steak was seasoned just the way I like it and a perfect medium rare to rare like requested.	Best NY steak on the planet.	Delicious sirloin and great selection of sides.	The meat is absolutely delicious, awesomely seasoned and beautifully cooked.	The service is fantastic, the steaks are out of this world.	Wonderful chain steak house with consistent quality of food and service.	I only eat Beef Brisket here because is delicious!	I order medium well.	Steaks were cooked perfect to our liking.	but it is fine dining Very good restaurants for meat lovers, you can choose from all kinds of steaks.	All four of our steaks were cooked to perfection, and the service was very good!	Excellent steak and service!	That plus a perfectly cooked steak makes this a great night out for any occasion.	My favorite selections are the Steak Tartare and the Lamb Chops.
I can't afford places with prix fix menus. I don't like many cuisines.	I prefer a more affordable place. I prefer a specific cuisine (French, Italian, American, etc).	The menu does not offer a lot of things and mostly offers steaks and chicken courses.	Great food with traditional Italian favorites as well as some more inventive menu items.	Superior restaurant, the only place I will have the dim sum.	Great food with traditional Italian favorites as well as some more inventive menu items.	Italian food Good portion, great music and a good place to go for a romantic date Always a great italian classic!	A good authentic restaurant with decent inside decor.												Great food with traditional Italian favorites as well as some more inventive menu items.	Italian food Good portion, great music and a good place to go for a romantic date Always a great italian classic!	Great food at a reasonable price.	Food is great but this place stands above the rest because of the homemade red salsa .	The prices are high but appropriate; overall, I rate this restaurant as a good value for fine dining, perfect for a business dinner or special occasion.	Very small place, but the food is great and the prices are affordable.	Great, old style Italian food with excellent service from the front door all the way through dessert.	A good authentic restaurant with decent inside decor.	Superior restaurant, the only place I will have the dim sum.	An Italian restaurant with great atmosphere and food One of my favorite italian places in the heart of Chicago.	Quality food at a more than reasonable price.	Great decor, helpful staff, and a variety of modern American and European food options.	With so many Italian restaurant choices in the area, so glad we went here.	Great Italian restaurant, affordable price and great menu selection	I go to fabulous restaurants on a regular basis, Michelin stars, Top Chef, etc, so food wise, excellent of course.
I don't like beer. My coworkers and I have less than 1h.	I prefer wine. I prefer a place that will serve us quickly.	I had two IPAs, a PB&j sour and a stout with maple and coffee.	Indians just one suggestion have a very mild beer, their strong beers tend to be very bitter, u might not enjoy them	We had a few local beers while here, but service was a bit on the slow side.	The wine selections are plentiful and the food I quite exquisite.	Food is good and wine is OK.	The house wine is good.												The wine selections are plentiful and the food I quite exquisite.	Food is good and wine is OK.	Fantastic steaks and wine.	I return regularly Great food and wine.	The food is delicious as well as the cocktails!	The food was delicious, the wine was good, and the service was friendly.	Even a bar service with food would be welcomed.	The house wine is good.	Great wine menu, cocktails and some nice dishes.	They have a nice drink and wine selection to go with your meal.	Excellent drinks , just okay food.	Wine by the glass is also available.	An excellent cocktail, nice service and very good food.	The food was delicious and tasted great with my wine	Atmosphere is wonderful and the bar is always attentive to keep your not waiting around if you want another glass.
I eat meat occasionally. My entire family is lactose intolerant.	I prefer vegetarian cuisine. I prefer an allergen-free place.	I'm vegan for health reasons.	Lamb and beef plate is great, I get that with hummus veggies and rice.	Well prepared and delicious Indian food (I ate vegetarian food).	but it is fine dining Very good restaurants for meat lovers, you can choose from all kinds of steaks.	Such a great selection of vegetarian & vegan options too!	I only eat Beef Brisket here because is delicious!												but it is fine dining Very good restaurants for meat lovers, you can choose from all kinds of steaks.	Such a great selection of vegetarian & vegan options too!	One of my top places for tasty quality meals.	Food is absolutely delicious and there are so many choices!	Indian Garden is one of my favorite restaurants.	Love eating here!	I go to fabulous restaurants on a regular basis, Michelin stars, Top Chef, etc, so food wise, excellent of course.	I only eat Beef Brisket here because is delicious!	Really nice restaurant if you want to eat some excellent meats.	Had good vegetarian options as well.	Large selection of vegetarian and non-vegetarian meals.	My favorite selections are the Steak Tartare and the Lamb Chops.	I really love the Greek salad here with lamb and beef meat.	I love Indian Garden and dine there whenever I'm in the area.	One of my preferred places for tasty Quality Meals.
I like being able to have a conversation over dinner. It looks too fancy.	I prefer a place that is quieter. I prefer a more casual place.	But menu is just beautiful and food is great too.	Good for family dinner or dinner with office colleagues.	In good weather, I particularly enjoy the outdoor dining.	üòãüòã Good cozy place with decent food and drinks	And secondly the Lounge, where you can just a get a drink and enjoy the view.	Great place to relax and have a bite to eat and get away from the loudness of the city.												üòãüòã Good cozy place with decent food and drinks	And secondly the Lounge, where you can just a get a drink and enjoy the view.	Overall a great place for a date or a family dinner.	This is a great place for friends or a cute date night.	Pleasant outdoor dining good food good service Good place with a calm atmosphere.	Excellent spot to spend time alone or talk business.	Great ambiance - felt like a lounge more than a restaurant.	Great place to relax and have a bite to eat and get away from the loudness of the city.	The place is extremely crowded and noisy - not a place for a romantic dinner :))	Spendy and could be a more relaxed atmosphere.	I think, at the weekend this place will be crowded and too noisy.	A great place for a meal or just cocktails and a view.	Food, service and ambiance are great!	In good weather, I particularly enjoy the outdoor dining.	Great place for a special dinner, room for a medium size crowd.
It seems too fancy. I'm not interested in fish.	I prefer a more casual place. I prefer chicken.	For dinner, I enjoyed the scallops one night and the sea bass the second.	Both lobster bisque and steak were little salty for me but overall great food and nice that they were served hot!	I ordered the salmon which was okay, it was cooked well	Chicken flautas are always delish.	Superior restaurant, the only place I will have the dim sum.	Best Chicken												Chicken flautas are always delish.	Superior restaurant, the only place I will have the dim sum.	OUTSIDE OF THIS SMALL PLACE IS A GOOD AREA TO EAT....	great place for a quick meal.	One of my top places for tasty quality meals.	It's a good place to eat, has a drive thru	Good place, good burgers.	Best Chicken	My preferred location for delicious Burgers.	Great place for quality meals.	One of my preferred places for tasty Quality Meals.	Overall a great place for a date or a family dinner.	Great place to go to for a great meal.	I order medium well.	but it is fine dining Very good restaurants for meat lovers, you can choose from all kinds of steaks.
I don't like curry. Booth seating would be more comfortable.	I prefer Italian or Chinese. I prefer bench seating.	I usually order to-go, but there is indoor seating if you prefer to dine-in (as of 10/20, although capacity is reduced due to COVID)	They put a shade over there seating area which is nice	Spendy and could be a more relaxed atmosphere.	I usually order to-go, but there is indoor seating if you prefer to dine-in (as of 10/20, although capacity is reduced due to COVID)	My go-to place for fast Greek food!	My fav spot for quality greek food.												I usually order to-go, but there is indoor seating if you prefer to dine-in (as of 10/20, although capacity is reduced due to COVID)	My go-to place for fast Greek food!	Comfortable dining environment.	I really love the Greek salad here with lamb and beef meat.	Good food Gyros is so delicious and refreshing to eat was looking for a gyro downtown near work Tasty and fresh.	Very comfortable dining experience.	Great decor, helpful staff, and a variety of modern American and European food options.	My fav spot for quality greek food.	Bit they have outdoor seating and its comfortable Great place for dinner.	lamb gyro all the way.	I always order tacos and rice.	I love the food best gyro, kitchen rotisserie is my best and with a spinach salad on the side yummyy :)	Greek food and the atmosphere here is quality.	My favorite location for delicious greek food.	Great place for a special dinner, room for a medium size crowd.
Waiting in line is boring. I'm trying to cut out carbs.	I prefer to book a table. I prefer a place with more healthy options.	45 minute wait for deep dish pizza but for the personal size lunch pizzas	(hour wait after ordering the pizza and 23 for small veggie deep dish)	It's mainly a drive thru.	Plenty of space to grab a table and have lunch with friends/colleagues.	Great place for a special dinner, room for a medium size crowd.	Good for unhurried and enjoyable small or medium-sized group dinner.												Plenty of space to grab a table and have lunch with friends/colleagues.	Great place for a special dinner, room for a medium size crowd.	Great place for quality meals.	In good weather, I particularly enjoy the outdoor dining.	Would suggest if dinning with 2 people get a small we got a medium between 2 people and it was alot, good but alot.	Good food in a relaxed atmosphere.	Superior restaurant, the only place I will have the dim sum.	Good for unhurried and enjoyable small or medium-sized group dinner.	Food is good, lots of choices at the salad bar.	Overall a great place for a date or a family dinner.	The buffet is excellent with a good combination of meat/vegetarian dishes as well as spicy/non-spicy options.	I usually just get one or two drinks and either a dessert or a appetizer (because of the cost) but the view is out of the world!	Bit they have outdoor seating and its comfortable Great place for dinner.	Amazing food, beautiful self serve entree and salad bars.	A great place for a meal or just cocktails and a view.
I would only eat snails if I were forced. I heard they had terrible service.	I prefer more common food. I prefer an attentive service.	Calamari were surprisingly good for a pizza place.	Both lobster bisque and steak were little salty for me but overall great food and nice that they were served hot!	Everything delicious with an exception of the shrimps.	The food is always fresh and flavorful, cashiers provides excellent service.	The service and food are always great.	The food is regularly well prepared and yummy, cashiers provides awesome customer service.												The food is always fresh and flavorful, cashiers provides excellent service.	The service and food are always great.	The service was good and the food was as well.	Food is well prepared, staff is friendly and tables and area is well cleaned and kept.	All in all, ambiance, food and customer service is one of a kind!	Food is very nicely prepared and presented.	But menu is just beautiful and food is great too.	The food is regularly well prepared and yummy, cashiers provides awesome customer service.	Food is good, open late and a drive thru !!	Great food but service can be better.	The food arrives quick and the service is just awesome.	Food, service and ambiance are great!	The food arrives quickly and the service is just great.	I‚Äôve been a customer for 8 years now, good food for decent prices.	I like the swift customer service and well cooked food.
My wife is very picky with ambience. I have been trying to eat healthier.	I prefer a more elegant place. I prefer a place that serves organic and/or local products.	Had a great time with my gf enjoying everything on the menu .	My fianc√© even said at the end of our dinner ‚Äúthis was the best restaurant in my entire life	I found that I do not enjoy tuna, but my mom thought it was excellent.	I go here whenever I want something Good, filling, and great price..	Great place for quality meals.	Superior restaurant, the only place I will have the dim sum.												I go here whenever I want something Good, filling, and great price..	Great place for quality meals.	Excellent portions, fresh ingredients and a solid mainstream selection of things to taste.	Great decor, helpful staff, and a variety of modern American and European food options.	Fantastic and flavorful food, I love the ambience this place has, and the cashiers were friendly.	Besides this, the restaurant is conveniently located near many shopping destinations, and I was very happy with the experience I had here.	Food is great but this place stands above the rest because of the homemade red salsa .	Superior restaurant, the only place I will have the dim sum.	Such a great selection of vegetarian & vegan options too!	One of my top places for tasty quality meals.	One of my preferred places for tasty Quality Meals.	Quality food at a more than reasonable price.	I‚Äôve been a customer for 8 years now, good food for decent prices.	Farmers has always been one of my favorite restaurants in the area!	Food, service and ambiance are great!
I'm not into Asian fusion. They seem to have too many people.	I prefer traditional French cuisine. I prefer a more quiet place.	I've seen alot of Indian folks over us who are not from that culture and figure it had to be good.	Chinese food here - super tasty.	Went with 3 other friends and were well distanced from any other patrons.	It was by far my favorite Italian cuisine compared to the other three	Italian food Good portion, great music and a good place to go for a romantic date Always a great italian classic!	Great food with traditional Italian favorites as well as some more inventive menu items.												It was by far my favorite Italian cuisine compared to the other three	Italian food Good portion, great music and a good place to go for a romantic date Always a great italian classic!	Great place to relax and have a bite to eat and get away from the loudness of the city.	I love the food here.	Food is similar to a place in San Francisco I loved.	But menu is just beautiful and food is great too.	The best Italian food I've had in Chicago, so far.	Great food with traditional Italian favorites as well as some more inventive menu items.	Good food in a relaxed atmosphere.	In good weather, I particularly enjoy the outdoor dining.	An Italian restaurant with great atmosphere and food One of my favorite italian places in the heart of Chicago.	With so many Italian restaurant choices in the area, so glad we went here.	Excellent service ambience & cuisine!!!	Brazilian food and the atmosphere at this place is excellent.	Great, old style Italian food with excellent service from the front door all the way through dessert.
Spices don't agree with me. Jalapenos are my limit.	I prefer a more mild dish. I prefer food without jalapenos.	Fish tacos are so good, sauce is very hot	But I‚Äôm not a BBQ aficionado	were truly from the smoker, and they had the feel of mostly grilled ribs to me, which I do not like.	I always get the chicken flautas entree, garlic shrimp tacos and the cheese	Fish tacos are so good, sauce is very hot	Key about the pizza here is to have it with extra basil leaves, spicy pepper flakes, cheese or ranch on the side.												I always get the chicken flautas entree, garlic shrimp tacos and the cheese	Fish tacos are so good, sauce is very hot	Sauce was well flavoured, cheese stringy and toppings fresh.	Tomato bisque and grilled cheese were excellent too.	As my toppings I added tzatziki, feta, cucumbers, tomatoes, and kalamata olives.	grilled chicken with avocado and bacon.......soooo yummy.	Grilled pineapple is quite yummy.	Key about the pizza here is to have it with extra basil leaves, spicy pepper flakes, cheese or ranch on the side.	Quesadillas are the best!!!	I always order tacos and rice.	My favorite dish is the Pappardelle Pasta with the tomato basil sauce.	I've had at other high class restaurants, but the chimichurri and sun dried tomato puree that accompanied	Nachos are bomb	a super burrito - asada was tender, salsas were good, rice was fluffy and flavorful (would prefer no rice at all, but it seems to be the standard).	The habanero slaw was awesome (vinegar) as were the collards.
I don't like family style restaurants. I don't like beer.	I prefer a place where I can remain undisturbed. I prefer wine.	Excellent drinks , just okay food.	I guess I didn't really go into the restaurant a few years ago, just the bar area for happy hour.	This is a 4 star, kid-friendly place for American food, seafood and steaks which also serves alcohol.	The wine selections are plentiful and the food I quite exquisite.	Very nice place to relax have a cocktail and apitizers.	Food is good and wine is OK.												The wine selections are plentiful and the food I quite exquisite.	Very nice place to relax have a cocktail and apitizers.	An excellent place to grab a cocktail or an after dinner desert and people watch!	Great wine menu, cocktails and some nice dishes.	And secondly the Lounge, where you can just a get a drink and enjoy the view.	The food was delicious and tasted great with my wine	Atmosphere is wonderful and the bar is always attentive to keep your not waiting around if you want another glass.	Food is good and wine is OK.	The house wine is good.	Wine by the glass is also available.	I return regularly Great food and wine.	A great place for a meal or just cocktails and a view.	The perfect place to sip a martini while watching the sunset with your hunny!	In good weather, I particularly enjoy the outdoor dining.	üòãüòã Good cozy place with decent food and drinks
I always feel good about plant based. Not a fan of red meat.	I prefer plant based cuisine. I prefer chicken, fish, or veggie.	I only eat Beef Brisket here because is delicious!	were truly from the smoker, and they had the feel of mostly grilled ribs to me, which I do not like.	I'm vegan for health reasons.	Food is always great...lot of variety in veg and non	I'm vegan for health reasons.	I really love the Greek salad here with lamb and beef meat.												Food is always great...lot of variety in veg and non	I'm vegan for health reasons.	Well prepared and delicious Indian food (I ate vegetarian food).	Fresh salad, I love bread and delicious pot pie.	We started with appetizers, our choice was crab legs, oysters, shrimp, smoked salmon and Blue cheese.	Food is absolutely delicious and there are so many choices!	I am a huge fan of steaks, so i love coming here for my month protein.	I really love the Greek salad here with lamb and beef meat.	I only eat Beef Brisket here because is delicious!	delicious steaks and seafood...	Everything delicious with an exception of the shrimps.	Lamb and beef plate is great, I get that with hummus veggies and rice.	We started with the Cast Iron Mediterranean Mussels, tasty with garlic and herbs.	My favorite selections are the Steak Tartare and the Lamb Chops.	My favorite dish is the Pappardelle Pasta with the tomato basil sauce.
I don't enjoy eating indoors. I could go to a mom and pop burger place.	I prefer eating on the patio. I prefer a more unique burger place.	A fun place to eat give plenty of fries better than McDonald's all the food	But I eat here once and a while staring my commute home.	Superior restaurant, the only place I will have the dim sum.	My preferred location for delicious Burgers.	One of my top places for tasty quality meals.	Great burgers and shakes Nice lunch spot.												My preferred location for delicious Burgers.	One of my top places for tasty quality meals.	One of my preferred places for tasty Quality Meals.	4 stars only because I've had a way better, gourmet burger elsewhere for the price.	Food is great but this place stands above the rest because of the homemade red salsa .	In good weather, I particularly enjoy the outdoor dining.	But menu is just beautiful and food is great too.	Great burgers and shakes Nice lunch spot.	One of my favorite locations for tasty Quality Meals.	Pretty good place for quick tacos and Quesadilla.	One of my favorite places in Chicago, the food is top.	Good place, good burgers.	Superior restaurant, the only place I will have the dim sum.	Best Burger in town.	Great place to get great food burgers were sooooooooooo good that I came back the next week.
I'm pescatarian. I don't like booth seating.	I prefer fish. I prefer a table.	I'm vegan for health reasons.	Social distance seating was excellent, actually made for a much less hectic experience than most steak places.	I was full by the time my salmon entree came to the table!	For dinner, I enjoyed the scallops one night and the sea bass the second.	I selected the pasta option minus the seafood.	My favorite dish is the Pappardelle Pasta with the tomato basil sauce.												For dinner, I enjoyed the scallops one night and the sea bass the second.	I selected the pasta option minus the seafood.	We had the small charcuterie board and we shared some sushi rolls, a few signature cocktails ‚Äúthe gNoMi ‚Äú yum!	Good for unhurried and enjoyable small or medium-sized group dinner.	My favorite selections are the Steak Tartare and the Lamb Chops.	The scallops are terrific.	For the main course our waiter, Ron, recommended the lamb chops and grilled trout.	My favorite dish is the Pappardelle Pasta with the tomato basil sauce.	I was full by the time my salmon entree came to the table!	The rest of my table also enjoyed their meals.	I liked my red velvet martini, and the calamari.	Tonight we choose to have an appetizer of the dungeness crab cakes.	I really enjoyed the sausage plate and my wife loved the shrimp linguini.	We started with appetizers, our choice was crab legs, oysters, shrimp, smoked salmon and Blue cheese.	delicious steaks and seafood...
It seems too fancy. Food trucks are underwhelming.	I prefer a more casual place. I prefer sit-down restaurants.	Good lettuce wraps Burgers could have been bigger Love the ice cream	Despite the fact that The Capital Grille is a chain, it is consistently excellent.	The Grill has solid food.	Food, service and ambiance are great!	Superior restaurant, the only place I will have the dim sum.	I guess I didn't really go into the restaurant a few years ago, just the bar area for happy hour.												Food, service and ambiance are great!	Superior restaurant, the only place I will have the dim sum.	A great place for happy hour and lunch.	A great place for a meal or just cocktails and a view.	Delicious food, great service every time and the decor and atmosphere of the restaurant is so charming and warm.	It's a good place to eat, has a drive thru	Not only offers a romantic vibe and delicious food for special occasions but also welcomes you for a casual date night at the bar where you can enjoy the view and desserts!	I guess I didn't really go into the restaurant a few years ago, just the bar area for happy hour.	This place has a good vibe and a decent menu.	Overall a great place for a date or a family dinner.	Very good upscale restaurant.	I like to go with friends to this restaurant with my highest recommendations.	Great food but service can be better.	Food is good, open late and a drive thru !!	Great place for quality meals.
That's not good for a date. I like to stay under $20 a meal.	I prefer a more romantic place. I prefer a more affordable place.	But it was plenty to satisfy a craving for grilled meats, and I would come back if the dinner prices were a little cheaper.	60 bucks a person for unlimited entrees and buffet bar.	A little more pricey than the typical dinner spot, but the location and service are worth it.	Overall a great place for a date or a family dinner.	A great place for a meal or just cocktails and a view.	Nice place for a date night.												Overall a great place for a date or a family dinner.	A great place for a meal or just cocktails and a view.	Spendy and could be a more relaxed atmosphere.	Nice views, food and drinks to enjoy a late night on the town.	pricy However is worth the price, want to impress your girl come here Very pleasant atmosphere and drinks üç∏ üç∑	Very small place, but the food is great and the prices are affordable.	A little more pricey than the typical dinner spot, but the location and service are worth it.	Nice place for a date night.	üòãüòã Good cozy place with decent food and drinks	elegant, upscale and classy place for a special occasion.	Not only offers a romantic vibe and delicious food for special occasions but also welcomes you for a casual date night at the bar where you can enjoy the view and desserts!	The place is extremely crowded and noisy - not a place for a romantic dinner :))	This is a great place for friends or a cute date night.	And secondly the Lounge, where you can just a get a drink and enjoy the view.	Best neighborhood patio that's tucked away above the street Amazing ambience and super personal service.
I gave up meat. That's horribly cheap wine.	I prefer vegan food. I prefer a more fancy wine.	But it was plenty to satisfy a craving for grilled meats, and I would come back if the dinner prices were a little cheaper.	Yes a good steak is expensive!	Everything was delicious, though I was disappointed in the veal, tough and would have been better over pasta.	I'm vegan for health reasons.	Food is good and wine is OK.	Such a great selection of vegetarian & vegan options too!												I'm vegan for health reasons.	Food is good and wine is OK.	Wine by the glass is also available.	I only eat Beef Brisket here because is delicious!	Vegan friendly as we are on a newly recent vegan transition.	For instance, they could use a few more vegetarian options.	The wine selections are plentiful and the food I quite exquisite.	Such a great selection of vegetarian & vegan options too!	I really love the Greek salad here with lamb and beef meat.	Fresh salad, I love bread and delicious pot pie.	Food is always great...lot of variety in veg and non	Delicious but also more of a brunch type of drink.	Fantastic steaks and wine.	Well prepared and delicious Indian food (I ate vegetarian food).	Love me a great Malbec and ribeye and this hit the spot!
Spices don't agree with me. I have a standing date with my niece on Saturdays.	I prefer a more mild dish. I prefer the place to be family friendly on Saturdays.	Pasta was yummy and a good portion for the two of us.	is I will be bringing my family, sure they will love their pasta!	I've really enjoyed myself my niece took me to brunch after church	Overall a great place for a date or a family dinner.	I always get the chicken flautas entree, garlic shrimp tacos and the cheese	Food, service and ambiance are great!												Overall a great place for a date or a family dinner.	I always get the chicken flautas entree, garlic shrimp tacos and the cheese	One of my top places for tasty quality meals.	I love Indian Garden and dine there whenever I'm in the area.	Excellent steak, cocktail, bread, sides, service, with a great atmosphere.	The prices are high but appropriate; overall, I rate this restaurant as a good value for fine dining, perfect for a business dinner or special occasion.	This place has a good vibe and a decent menu.	Food, service and ambiance are great!	quality meals and the setting at this place is excellent.	The buffet is excellent with a good combination of meat/vegetarian dishes as well as spicy/non-spicy options.	I had a few of the happy hour appetizers and they were fantastic.	We've also dined here for lunch and thre chicken parmesan	The atmosphere seems like a place my parents (or grandparents) would have enjoyed but the food and service was great.	The ambiance, foods and hosts are excellent!	The staff is excellent, and each dish is wonderfully crafted.
I think I'll skip the vegetables for today. My entire family is lactose intolerant.	I prefer a restaurant that serves only meat. I prefer an allergen-free place.	I'm vegan for health reasons.	Lamb and beef plate is great, I get that with hummus veggies and rice.	As my toppings I added hummus, tahini, cucumbers, and tomatoes.	but it is fine dining Very good restaurants for meat lovers, you can choose from all kinds of steaks.	Food is good, open late and a drive thru !!	Really nice restaurant if you want to eat some excellent meats.												but it is fine dining Very good restaurants for meat lovers, you can choose from all kinds of steaks.	Food is good, open late and a drive thru !!	I order medium well.	4 stars only because I've had a way better, gourmet burger elsewhere for the price.	My favorite selections are the Steak Tartare and the Lamb Chops.	It's a good place to eat, has a drive thru	The service is fantastic, the steaks are out of this world.	Really nice restaurant if you want to eat some excellent meats.	Superior restaurant, the only place I will have the dim sum.	Wonderful chain steak house with consistent quality of food and service.	The food was excellent, I like my steak	My preferred location for delicious Burgers.	Wow, a wonderful upscale place with exceptional quality meats, great atmosphere and service	I only eat Beef Brisket here because is delicious!	Service was great and the meat was tasty.
I'm not into Asian fusion. I'm not a big meat eater.	I prefer traditional French cuisine. I prefer vegetarian cuisine.	But I‚Äôm not a BBQ aficionado	I'm vegan for health reasons.	I only eat Beef Brisket here because is delicious!	It was by far my favorite Italian cuisine compared to the other three	I really love the Greek salad here with lamb and beef meat.	My favorite dish is the Pappardelle Pasta with the tomato basil sauce.												It was by far my favorite Italian cuisine compared to the other three	I really love the Greek salad here with lamb and beef meat.	We started with the Cast Iron Mediterranean Mussels, tasty with garlic and herbs.	Food is always great...lot of variety in veg and non	Good, delicious food that serves food with history and smiles.	Great food with traditional Italian favorites as well as some more inventive menu items.	It was one of my favorite Italian dishes I‚Äôve ever tried.	My favorite dish is the Pappardelle Pasta with the tomato basil sauce.	I grew up on the east coast eating a lot of good Italian food both in restaurants and homemade by family.	Well prepared and delicious Indian food (I ate vegetarian food).	Delicious and a wide variety of dishes.	Fresh salad, I love bread and delicious pot pie.	Food is absolutely delicious and there are so many choices!	delicious steaks and seafood...	we‚Äôve had some warm bread with butter, young roasted chicken with beans, smoked octopus with hummus and a very soft baked chicken breast,with some pickled onions and mushrooms.
I wouldn't eat anything raw or undercooked. I would only eat snails if I were forced.	I prefer cooked food only (no sushi or sashimi). I prefer more common food.	Everything delicious with an exception of the shrimps.	Calamari were surprisingly good for a pizza place.	Both lobster bisque and steak were little salty for me but overall great food and nice that they were served hot!	Everything delicious with an exception of the shrimps.	Chinese food here - super tasty.	Sushi quality is high and real, fresh fish.												Everything delicious with an exception of the shrimps.	Chinese food here - super tasty.	We started with appetizers, our choice was crab legs, oysters, shrimp, smoked salmon and Blue cheese.	It may have literally been the best sushi I have ever had.	I love love love Indian food and have tested plenty of restaurants.	I selected the pasta option minus the seafood.	Would not be my top sashimi restaurant, but for the convenience, it was worth it.	Sushi quality is high and real, fresh fish.	Food is absolutely delicious and there are so many choices!	My favorite dish is the Pappardelle Pasta with the tomato basil sauce.	delicious steaks and seafood...	Food is always great...lot of variety in veg and non	Both lobster bisque and steak were little salty for me but overall great food and nice that they were served hot!	I always order tacos and rice.	I always get the chicken flautas entree, garlic shrimp tacos and the cheese
Family style restaurants are usually lame. I don't like going to high-end places.	I prefer a quiet place. I prefer less expensive places.	The atmosphere seems like a place my parents (or grandparents) would have enjoyed but the food and service was great.	The menu does not offer a lot of things and mostly offers steaks and chicken courses.	But menu is just beautiful and food is great too.	Great place to relax and have a bite to eat and get away from the loudness of the city.	üòãüòã Good cozy place with decent food and drinks	And secondly the Lounge, where you can just a get a drink and enjoy the view.												Great place to relax and have a bite to eat and get away from the loudness of the city.	üòãüòã Good cozy place with decent food and drinks	The place is extremely crowded and noisy - not a place for a romantic dinner :))	Overall a great place for a date or a family dinner.	Good food in a relaxed atmosphere.	Great place for a special dinner, room for a medium size crowd.	The place doesn't have a great ambience, but it has high cielings, is super clean, and the staff is helpful.	And secondly the Lounge, where you can just a get a drink and enjoy the view.	Spendy and could be a more relaxed atmosphere.	Food, service and ambiance are great!	A great place for a meal or just cocktails and a view.	In good weather, I particularly enjoy the outdoor dining.	Excellent spot to spend time alone or talk business.	Great ambiance - felt like a lounge more than a restaurant.	Pleasant outdoor dining good food good service Good place with a calm atmosphere.
Not vegetarian. That's too upscale for me.	I prefer vegetarian. I prefer a more casual place.	The menu does not offer a lot of things and mostly offers steaks and chicken courses.	Such a great selection of vegetarian & vegan options too!	Large selection of vegetarian and non-vegetarian meals.	Such a great selection of vegetarian & vegan options too!	but it is fine dining Very good restaurants for meat lovers, you can choose from all kinds of steaks.	Had good vegetarian options as well.												Such a great selection of vegetarian & vegan options too!	but it is fine dining Very good restaurants for meat lovers, you can choose from all kinds of steaks.	I go to fabulous restaurants on a regular basis, Michelin stars, Top Chef, etc, so food wise, excellent of course.	One of my preferred places for tasty Quality Meals.	They have vegan options, fresh produce, an interesting, ever-changing menu selection, and the most fabulous Mac and Cheese.	One of my top places for tasty quality meals.	Wow, a wonderful upscale place with exceptional quality meats, great atmosphere and service	Had good vegetarian options as well.	Really nice restaurant if you want to eat some excellent meats.	Large selection of vegetarian and non-vegetarian meals.	I'm vegan for health reasons.	OUTSIDE OF THIS SMALL PLACE IS A GOOD AREA TO EAT....	I only eat Beef Brisket here because is delicious!	Overall a great place for a date or a family dinner.	Great place for quality meals.
I don't think the kids would enjoy because it's so loud. I only eat organic.	I prefer a more quiet place. I prefer organic food.	Got some rice, bean and cheese burritos for the kids and they enjoyed them.	It can seem a bit stuffy when you are young but when you're an old timer like me just wanting to get away from the kids for a night, you appreciate the dimly lit rooms, quiet music, and non crowds.	I'm vegan for health reasons.	Great place to relax and have a bite to eat and get away from the loudness of the city.	Food, service and ambiance are great!	The ambiance, foods and hosts are excellent!												Great place to relax and have a bite to eat and get away from the loudness of the city.	Food, service and ambiance are great!	the food is just as good.	Food is similar to a place in San Francisco I loved.	One of my top places for tasty quality meals.	I just love their food.	Food is good, lots of choices at the salad bar.	The ambiance, foods and hosts are excellent!	Good food in a relaxed atmosphere.	Great place for quality meals.	Farmers has always been one of my favorite restaurants in the area!	Food is great but this place stands above the rest because of the homemade red salsa .	In good weather, I particularly enjoy the outdoor dining.	One of my preferred places for tasty Quality Meals.	Really nice restaurant if you want to eat some excellent meats.
I can't handle dairy. I've never enjoyed eating vegetables.	I prefer a lactose free place. I prefer meat.	I'm vegan for health reasons.	Lamb and beef plate is great, I get that with hummus veggies and rice.	then again, I love cheese.	I'm vegan for health reasons.	then again, I love cheese.	There vanilla milkshake is just the best.												I'm vegan for health reasons.	then again, I love cheese.	Very creamy and soft, yummy!	Chicken moist and tender.	The meat, cheese, and crust ratio is incredible.	Lamb and beef plate is great, I get that with hummus veggies and rice.	My favorite selections are the Steak Tartare and the Lamb Chops.	There vanilla milkshake is just the best.	I only eat Beef Brisket here because is delicious!	I am a huge fan of steaks, so i love coming here for my month protein.	Steak is like butter!	lamb gyro all the way.	The milkshakes are delicious!	I'll keep this short n sweet..AMAZING place if you want to grub on all kinds of meat..	I order medium well.
I'm too hungry for a salad. I could go to a mom and pop burger place.	I prefer a more substantial meal. I prefer a more unique burger place.	What I ordered: A large Caesar salad and a large bowl of tomato soup.	Fresh salad, I love bread and delicious pot pie.	I went for a lunch buffet and they had wide variety in the buffet menu.	4 stars only because I've had a way better, gourmet burger elsewhere for the price.	Good burgers, fries, and service.	Best Burger in town.												4 stars only because I've had a way better, gourmet burger elsewhere for the price.	Good burgers, fries, and service.	Great place to get great food burgers were sooooooooooo good that I came back the next week.	My preferred location for delicious Burgers.	Amazing Burgers and shakes!	Turkey burger and fries, both very tasty!	I really enjoyed my M burger "impossible burger" totally delicious!!!	Best Burger in town.	Very greasy chicken but burgers were excellent!!!	The fries are the best I have ever had.	Good place, good burgers.	The Impossible Burger is the best vegetarian burger I have ever had.	A fun place to eat give plenty of fries better than McDonald's all the food	Very good burger and fry establishment.	M burger is better value and a finer burger.
I don't like spending much money. Fast food is pretty bad for you.	I prefer a cheap place. I prefer more nutritious food.	Quality food at a more than reasonable price.	Food is so good and feels like I'm eating healthy even of	Good price on the burgers, sodas are a bit too much.	Quality food at a more than reasonable price.	The price is amazing for the quality of food you get.	Great place for quality meals.												Quality food at a more than reasonable price.	The price is amazing for the quality of food you get.	Great food at great prices.	On the pricier side and decently fresh.	the food is just as good.	Superior restaurant, the only place I will have the dim sum.	The place serves large portions and for affordable prices.	Great place for quality meals.	Price is good, food is great	Great food at a reasonable price.	I go here whenever I want something Good, filling, and great price..	But it was plenty to satisfy a craving for grilled meats, and I would come back if the dinner prices were a little cheaper.	One of my top places for tasty quality meals.	I‚Äôve been a customer for 8 years now, good food for decent prices.	One of my preferred places for tasty Quality Meals.
I think I'll skip the vegetables for today. That's not exactly fresh.	I prefer a restaurant that serves only meat. I prefer organic food.	I could have eaten it all night.	Got the seafood platter and it was fresh.	Amazing salad.	but it is fine dining Very good restaurants for meat lovers, you can choose from all kinds of steaks.	I only eat Beef Brisket here because is delicious!	The food was excellent, I like my steak												but it is fine dining Very good restaurants for meat lovers, you can choose from all kinds of steaks.	I only eat Beef Brisket here because is delicious!	Wow, a wonderful upscale place with exceptional quality meats, great atmosphere and service	I just love their food.	Food is good, open late and a drive thru !!	The Impossible Burger is the best vegetarian burger I have ever had.	Farmers has always been one of my favorite restaurants in the area!	The food was excellent, I like my steak	Really nice restaurant if you want to eat some excellent meats.	Wonderful chain steak house with consistent quality of food and service.	Quality food at a more than reasonable price.	For instance, they could use a few more vegetarian options.	I'm vegan for health reasons.	Such a great selection of vegetarian & vegan options too!	Had good vegetarian options as well.
I wouldn't eat anything raw or undercooked. There isn't much variety.	I prefer cooked food only (no sushi or sashimi). I prefer a larger menu.	Food is always great...lot of variety in veg and non	Everything delicious with an exception of the shrimps.	Some bites were good, the sauce had a nice flavor, but the ribs overall were far too dry.	Would not be my top sashimi restaurant, but for the convenience, it was worth it.	I always get the chicken flautas entree, garlic shrimp tacos and the cheese	Everything delicious with an exception of the shrimps.												Would not be my top sashimi restaurant, but for the convenience, it was worth it.	I always get the chicken flautas entree, garlic shrimp tacos and the cheese	I selected the pasta option minus the seafood.	My favorite dish is the Pappardelle Pasta with the tomato basil sauce.	The sushi was fair but not very special and the menu looked very standard.	I've had at other high class restaurants, but the chimichurri and sun dried tomato puree that accompanied	We started with appetizers, our choice was crab legs, oysters, shrimp, smoked salmon and Blue cheese.	Everything delicious with an exception of the shrimps.	Sushi quality is high and real, fresh fish.	Burger, Halibut Bouillabaisse, and sushi are all fantastic Very good breakfast food and service.	Both lobster bisque and steak were little salty for me but overall great food and nice that they were served hot!	I always order tacos and rice.	Sushi rolls and octopus salad were really flavorful and good, lounge seating is quite memorable and comfortable‚Ä¶ Great view and food.	Chinese food here - super tasty.	It may have literally been the best sushi I have ever had.
Fried stuff has way too many calories. It seems too loud for me.	I prefer healthier food. I prefer a more quiet place to eat.	Food is so good and feels like I'm eating healthy even of	Rice in the rice pudding is so hard.	Lamb and beef plate is great, I get that with hummus veggies and rice.	Food is absolutely delicious and there are so many choices!	Good food in a relaxed atmosphere.	But menu is just beautiful and food is great too.												Food is absolutely delicious and there are so many choices!	Good food in a relaxed atmosphere.	But I eat here once and a while staring my commute home.	The food is always great.	Food is fantastic!	Great food but service can be better.	Consistently good food!	But menu is just beautiful and food is great too.	In good weather, I particularly enjoy the outdoor dining.	Food is delicious and portions are huge!	Food is good, lots of choices at the salad bar.	the food is just as good.	Great place to relax and have a bite to eat and get away from the loudness of the city.	I just love their food.	Food, service and ambiance are great!
I'd rather have something with dairy. I'm with a vegan friend.	I prefer fresh cheese, butter, cream. I prefer a place with vegan options.	I'm vegan for health reasons.	Well prepared and delicious Indian food (I ate vegetarian food).	Such a great selection of vegetarian & vegan options too!	They have vegan options, fresh produce, an interesting, ever-changing menu selection, and the most fabulous Mac and Cheese.	Best meats around and vanilla/peanut butter ice cream pie slice that is out of this world.	Such a great selection of vegetarian & vegan options too!												They have vegan options, fresh produce, an interesting, ever-changing menu selection, and the most fabulous Mac and Cheese.	Best meats around and vanilla/peanut butter ice cream pie slice that is out of this world.	Spicy chix sandwich is the best.	As my toppings I added hummus, tahini, cucumbers, and tomatoes.	Our fav is the hash brown skillet with chorizo added.	The meat, cheese, and crust ratio is incredible.	My favorite dish is the Pappardelle Pasta with the tomato basil sauce.	Such a great selection of vegetarian & vegan options too!	Fresh salad, I love bread and delicious pot pie.	My favorite was the tri-tip with provolone cheese.	Lamb and beef plate is great, I get that with hummus veggies and rice.	then again, I love cheese.	I love their bread and their extensive menu.	Their salad bar items are seasoned really well, and of course the cheesy bread is delicious.	Best Cheesecake hands-down.
I don't enjoy eating indoors. I'm not into Asian fusion.	I prefer eating on the patio. I prefer traditional French cuisine.	Chinese food here - super tasty.	The food was good overall, we enjoy Asian food and this hit the spot.	Real authentic Indian food, no cheesy Bollywood decor Tastefully decorated, the restaurant immediately feels authentic when you step inside.	In good weather, I particularly enjoy the outdoor dining.	It was by far my favorite Italian cuisine compared to the other three	Great food with traditional Italian favorites as well as some more inventive menu items.												In good weather, I particularly enjoy the outdoor dining.	It was by far my favorite Italian cuisine compared to the other three	Food is great but this place stands above the rest because of the homemade red salsa .	With so many Italian restaurant choices in the area, so glad we went here.	I really love the Greek salad here with lamb and beef meat.	Love eating here!	The best Italian food I've had in Chicago, so far.	Great food with traditional Italian favorites as well as some more inventive menu items.	I grew up on the east coast eating a lot of good Italian food both in restaurants and homemade by family.	Food is similar to a place in San Francisco I loved.	We've also dined here for lunch and thre chicken parmesan	The buffet is excellent with a good combination of meat/vegetarian dishes as well as spicy/non-spicy options.	The food is always perfect, I recommend the eggplant parmesan, it is succulent.	Good food in a relaxed atmosphere.	My fav place for Brazilian food.
I'm not a fine dining type of person. I am not that keen on Indian vegetable dishes.	I prefer a more casual place. I prefer Chinese or Italian food.	I love love love Indian food and have tested plenty of restaurants.	Indian Garden is one of my favorite restaurants.	Good selection of curries (the chole were to die for), appetizers not that much.	Superior restaurant, the only place I will have the dim sum.	I highly recommend Shanghai Terrace over TAO or any hi end Chinese restaurant in the city.	Great food with traditional Italian favorites as well as some more inventive menu items.												Superior restaurant, the only place I will have the dim sum.	I highly recommend Shanghai Terrace over TAO or any hi end Chinese restaurant in the city.	My go-to place for fast Greek food!	The service and food are excellent, highly recommended Amazing and Chicago famous Italian cuisine.	Food, service and ambiance are great!	The buffet is excellent with a good combination of meat/vegetarian dishes as well as spicy/non-spicy options.	Italian food Good portion, great music and a good place to go for a romantic date Always a great italian classic!	Great food with traditional Italian favorites as well as some more inventive menu items.	I go to fabulous restaurants on a regular basis, Michelin stars, Top Chef, etc, so food wise, excellent of course.	It was by far my favorite Italian cuisine compared to the other three	Good food in a relaxed atmosphere.	Food is great but this place stands above the rest because of the homemade red salsa .	Great, old style Italian food with excellent service from the front door all the way through dessert.	The food was good overall, we enjoy Asian food and this hit the spot.	Overall a great place for a date or a family dinner.
I'd rather not eat Bambi. I do eat red meat but not all of the time.	I prefer seafood. I prefer fish, chicken, or vegetarian food.	I only eat Beef Brisket here because is delicious!	I'm vegan for health reasons.	but it is fine dining Very good restaurants for meat lovers, you can choose from all kinds of steaks.	Everything delicious with an exception of the shrimps.	delicious steaks and seafood...	I'm vegan for health reasons.														Great steak and salmon.	Burger, Halibut Bouillabaisse, and sushi are all fantastic Very good breakfast food and service.	I found that I do not enjoy tuna, but my mom thought it was excellent.	Food is always great...lot of variety in veg and non	For dinner, I enjoyed the scallops one night and the sea bass the second.		My favorite dish is the Pappardelle Pasta with the tomato basil sauce.	I selected the pasta option minus the seafood.	We started with appetizers, our choice was crab legs, oysters, shrimp, smoked salmon and Blue cheese.	My favorite selections are the Steak Tartare and the Lamb Chops.	Both lobster bisque and steak were little salty for me but overall great food and nice that they were served hot!	I only eat Beef Brisket here because is delicious!	I had the salmon with lentil rice pilaf and grilled veggies.
I'm not a meat eater. I could use a nice cold beer to pair with my meal.	I prefer a vegetarian place. I prefer a place that has beer on the menu.	I only eat Beef Brisket here because is delicious!	But I‚Äôm not a BBQ aficionado	Steak was seasoned just the way I like it and a perfect medium rare to rare like requested.	but it is fine dining Very good restaurants for meat lovers, you can choose from all kinds of steaks.	Such a great selection of vegetarian & vegan options too!	Had good vegetarian options as well.														Wow, a wonderful upscale place with exceptional quality meats, great atmosphere and service	They have a nice drink and wine selection to go with your meal.	Excellent steak, cocktail, bread, sides, service, with a great atmosphere.	Nice food, good service, great selection of beer.	Barrel house big sur double IPA üî• Absolutely love their new takeout menu.		Good burgers and beer.	Solid selection of on-tap craft beers and a decent food menu.	Really nice restaurant if you want to eat some excellent meats.	The beers on tap are all excellent.	Excellent drinks , just okay food.	Their steaks and lamb are also worth it.	They have vegan options, fresh produce, an interesting, ever-changing menu selection, and the most fabulous Mac and Cheese.
This place is overpriced. I've had my fair share of pizza already.	I prefer a more affordable place. I prefer something more original.	I am picky when it comes to pizza, but this place rocked.	I have not tasted a better pizza anywhere else, And even though we had to wait outside, it was well worth the wait!	Very good pizza, one of the best I've had.	elegant, upscale and classy place for a special occasion.	Overall a great place for a date or a family dinner.	Spendy and could be a more relaxed atmosphere.														Very small place, but the food is great and the prices are affordable.	A little more pricey than the typical dinner spot, but the location and service are worth it.	Best neighborhood patio that's tucked away above the street	Probably the best in downtown area.	The prices are high but appropriate; overall, I rate this restaurant as a good value for fine dining, perfect for a business dinner or special occasion.		Great place for quality meals.	Best neighborhood patio that's tucked away above the street Amazing ambience and super personal service.	A great place for a meal or just cocktails and a view.	Pricey but better than other options.	Quality food at a more than reasonable price.	It's good if you want to mix up your typical lunch routine downtown, but slightly overpriced and nothing extraordinary.	Superior restaurant, the only place I will have the dim sum.
I have quite a big stash of cash available. Burgers and fries are too heavy.	I prefer a more expensive place. I prefer a light meal.	I ordered cheeseburgers and their delicious fries!	Good price on the burgers, sodas are a bit too much.	But it was plenty to satisfy a craving for grilled meats, and I would come back if the dinner prices were a little cheaper.	A little more pricey than the typical dinner spot, but the location and service are worth it.	Superior restaurant, the only place I will have the dim sum.	Great place for quality meals.														But it was plenty to satisfy a craving for grilled meats, and I would come back if the dinner prices were a little cheaper.	great place for a quick meal.	The prices are high but appropriate; overall, I rate this restaurant as a good value for fine dining, perfect for a business dinner or special occasion.	Overall a great place for a date or a family dinner.	quality meals at this spot - great.		The price is amazing for the quality of food you get.	One of my top places for tasty quality meals.	One of my preferred places for tasty Quality Meals.	quality meals and the setting at this place is excellent.	Quality Meals and the scene at this spot is excellent.	Great food at a reasonable price.	Quality food at a more than reasonable price.
You know what? I got my paycheck today. Their dishes look over-seasoned.	I prefer an expensive place. I prefer food that is more natural.	a little pricey with some dishes better than others.	Quality Meals, mmm, my favorite treat.	I had a very productive business dinner here.	Quality food at a more than reasonable price.	The price is amazing for the quality of food you get.	Food is absolutely delicious and there are so many choices!														but it is fine dining Very good restaurants for meat lovers, you can choose from all kinds of steaks.	Certainly a place worth stopping over, the food is awesome and fresh, the costs are reasonable and it is constantly neat here.	Food is great but this place stands above the rest because of the homemade red salsa .	Very small place, but the food is great and the prices are affordable.	Food is definitely worth the money!		But menu is just beautiful and food is great too.	But it was plenty to satisfy a craving for grilled meats, and I would come back if the dinner prices were a little cheaper.	Great food at a reasonable price.	Price is good, food is great	the food is just as good.	The food is delicious, the price is reasonable.	Great place for quality meals.
Food trucks are usually too greasy. I'm craving something sweeter.	I prefer a more formal restaurant. I prefer something sweeter.	Good food with fast drive through service!	Very greasy chicken but burgers were excellent!!!	Good lettuce wraps Burgers could have been bigger Love the ice cream	Superior restaurant, the only place I will have the dim sum.	The restaurant has a great view and both choices of food were simply delicious and sophisticated.	It was a classy restaurant with great food varieties.														Delicious food, great service every time and the decor and atmosphere of the restaurant is so charming and warm.	I go to fabulous restaurants on a regular basis, Michelin stars, Top Chef, etc, so food wise, excellent of course.	A great place for a meal or just cocktails and a view.	Everything in the buffet is always high quality, has great flavor and a good amount of heat.	A beautiful and classy Steakhouse, their signature balsamic rub on the steak is to die for, like all client focused business their dedication and touch of personized dessert is sweet enough for anyone.		Overall a great place for a date or a family dinner.	Food, service and ambiance are great!	Very upscale, but tasty in a way that you'll appreciate.	The food in this place is delicious üòã and the lemon pie is my favorite.	Excellent drinks , just okay food.	The prices are high but appropriate; overall, I rate this restaurant as a good value for fine dining, perfect for a business dinner or special occasion.	Like a restaurant in Washington I liked.
I'm with my daughter's soccer team. I don't like fancy food.	I prefer a place with a kids' menu. I prefer a more casual place.	My daughter and I had the asada quesadilla and Chile verde fries.	Got some rice, bean and cheese burritos for the kids and they enjoyed them.	We ordered two family‚Äôs meals Togo- which were so delicious!	This is an affordable, kid-friendly place specialized in burgers and American food.	Food, service and ambiance are great!	But menu is just beautiful and food is great too.														A great place for happy hour and lunch.	Very good upscale restaurant.	The atmosphere seems like a place my parents (or grandparents) would have enjoyed but the food and service was great.	A fun place to eat give plenty of fries better than McDonald's all the food	Great place to go to for a great meal.		Superior restaurant, the only place I will have the dim sum.	This place has a good vibe and a decent menu.	This is a 4 star, kid-friendly, vegetarian-friendly place that serves Italian food and pizza which also serves alcohol.	This is a 4 star, kid-friendly, vegetarian-friendly place that serves American food and desserts which also serves alcohol.	Great place for quality meals.	Overall a great place for a date or a family dinner.	This is a 4 star, kid-friendly place for American food, seafood and steaks which also serves alcohol.
I'm not into fast food. I ate a lot yesterday so I'd like to eat lighter today.	I prefer more refined food. I prefer a more light restaurant.	Good food for being fast food	Food is so good and feels like I'm eating healthy even of	I finished half of it for lunch and then have for dinner.	Superior restaurant, the only place I will have the dim sum.	Everything in the buffet is always high quality, has great flavor and a good amount of heat.	But menu is just beautiful and food is great too.														Overall, the food is good and cooked well.	The menu is concise, the prices are high and the portions are modest, but the quality is excellent.	I go to fabulous restaurants on a regular basis, Michelin stars, Top Chef, etc, so food wise, excellent of course.	The price is amazing for the quality of food you get.	One of my top places for tasty quality meals.		Great food but service can be better.	4 stars only because I've had a way better, gourmet burger elsewhere for the price.	Food, service and ambiance are great!	Good food in a relaxed atmosphere.	Food is great but this place stands above the rest because of the homemade red salsa .	the food is just as good.	Quality food at a more than reasonable price.
My oldest just graduated. I'm not in the mood for ramen.	I prefer a place that is good for celebrating. I prefer a more fancy restaurant.	Got some rice, bean and cheese burritos for the kids and they enjoyed them.	My daughter and I had the asada quesadilla and Chile verde fries.	Delicious homemade pasta.	Overall a great place for a date or a family dinner.	A great place for a meal or just cocktails and a view.	Food, service and ambiance are great!														The atmosphere seems like a place my parents (or grandparents) would have enjoyed but the food and service was great.	We actually sort of stumbled into this place, early one early Saturday evening, just looking for a place to have ‚Äúa great dessert‚Äú.	It's still a nice restaurant with good food and helpful staff.	A good authentic restaurant with decent inside decor.	This place is a great dining experience for a very special occasion.		I love going here and getting take out or just a delicious slice of cheese cake.	Good food in a relaxed atmosphere.	Great place to go to for a great meal.	If you're looking for somewhere memorable to celebrate a special occasion, I absolutely recommend this place.	Superior restaurant, the only place I will have the dim sum.	üòãüòã Good cozy place with decent food and drinks	elegant, upscale and classy place for a special occasion.
I'm not into fast food. Today I'd like to splurge.	I prefer more refined food. I prefer a more expensive place.	I ordered cheeseburgers and their delicious fries!	Fast, cheap, late night food!	Good food for being fast food	Quality food at a more than reasonable price.	The price is amazing for the quality of food you get.	But menu is just beautiful and food is great too.														Great food but service can be better.	But it was plenty to satisfy a craving for grilled meats, and I would come back if the dinner prices were a little cheaper.	One of my top places for tasty quality meals.	I go here whenever I want something Good, filling, and great price..	Great food at great prices.		Great food at a reasonable price.	Superior restaurant, the only place I will have the dim sum.	On the pricier side and decently fresh.	the food is just as good.	I‚Äôve been a customer for 8 years now, good food for decent prices.	Great place for quality meals.	Price is good, food is great
I don't like fancy food. It looks too dark.	I prefer a more casual place. I prefer more light.	Food is great but this place stands above the rest because of the homemade red salsa .	Although it was the least favorite dish of the night, I still liked it with the small pieces of bacon.	But menu is just beautiful and food is great too.	In good weather, I particularly enjoy the outdoor dining.	And secondly the Lounge, where you can just a get a drink and enjoy the view.	A great place for a meal or just cocktails and a view.														Spendy and could be a more relaxed atmosphere.	Great ambiance - felt like a lounge more than a restaurant.	I definitely recommend this place if view and good cocktails is something that you desire.	I like the patio outside with the lighting	Good ambiance.		The ambiance of this place is like an old school upscale steakhouse, with rich woods abounding and moderate lighting.	üòãüòã Good cozy place with decent food and drinks	Atmosphere is wonderful and the bar is always attentive to keep your not waiting around if you want another glass.	Great place for a special dinner, room for a medium size crowd.	Overall a great place for a date or a family dinner.	elegant, upscale and classy place for a special occasion.	This is a great place for friends or a cute date night.
Didn't seem kid-friendly. The fish doesn't look appetizing.	I prefer a family-friendly place. I prefer meat.	The calamari was perfect.	The shrimp tasted so fresh!!	The scallops are terrific.	My preferred location for delicious Burgers.	I only eat Beef Brisket here because is delicious!	but it is fine dining Very good restaurants for meat lovers, you can choose from all kinds of steaks.														Love eating here!	I enjoyed eating here.	I order medium well.	One of my favorite locations for tasty Quality Meals.	Farmers has always been one of my favorite restaurants in the area!		I'll keep this short n sweet..AMAZING place if you want to grub on all kinds of meat..	Really nice restaurant if you want to eat some excellent meats.	Overall a great place for a date or a family dinner.	OUTSIDE OF THIS SMALL PLACE IS A GOOD AREA TO EAT....	One of my preferred places for tasty Quality Meals.	The food was excellent, I like my steak	My favorite selections are the Steak Tartare and the Lamb Chops.
I eat salads a few times a week but would rather have steak. Their dishes look over-seasoned.	I prefer a place with great steaks. I prefer food that is more natural.	The Caesar salad was very good, with the dressing being the best part of the entire salad.	I really love the Greek salad here with lamb and beef meat.	I love the food best gyro, kitchen rotisserie is my best and with a spinach salad on the side yummyy :)	but it is fine dining Very good restaurants for meat lovers, you can choose from all kinds of steaks.	I only eat Beef Brisket here because is delicious!	The food was excellent, I like my steak														Wonderful chain steak house with consistent quality of food and service.	My favorite selections are the Steak Tartare and the Lamb Chops.	Best NY steak on the planet.	Steaks were cooked perfect to our liking.	If you are in the area and looking for great steak, check this place out.		However nothing out here compares to the meats you get in Texas - some of the meats served	delicious steaks and seafood...	Really nice restaurant if you want to eat some excellent meats.	Fantastic steaks and wine.	Their steaks and lamb are also worth it.	Great steak and salmon.	Wow, a wonderful upscale place with exceptional quality meats, great atmosphere and service
I eat salads a few times a week but would rather have steak. Today is not a drinking day.	I prefer a place with great steaks. I prefer non-alcoholic cocktails.	Food is always great...lot of variety in veg and non	Food is so good and feels like I'm eating healthy even of	Food is good and wine is OK.	Excellent drinks , just okay food.	Fantastic steaks and wine.	The food was excellent, I like my steak														A great place for a meal or just cocktails and a view.	This is a 5 star, vegetarian-friendly, fine-dining place specialized in American food, seafood and steak which also serves alcohol and has a good wine menu.	Delicious filet mignon and friendly service, great for date night.	That plus a perfectly cooked steak makes this a great night out for any occasion.	The beers on tap are all excellent.		Excellent steak, cocktail, bread, sides, service, with a great atmosphere.	The steaks are excellent and the wine list is quite good.	The bar staff is great with a good liquor selection.	but it is fine dining Very good restaurants for meat lovers, you can choose from all kinds of steaks.	They have a nice drink and wine selection to go with your meal.	An excellent cocktail, nice service and very good food.	I definitely recommend this place if view and good cocktails is something that you desire.
My oldest just graduated. Their dishes look over-seasoned.	I prefer a place that is good for celebrating. I prefer food that is more natural.	Got some rice, bean and cheese burritos for the kids and they enjoyed them.	The rest of my table also enjoyed their meals.	My daughter and I had the asada quesadilla and Chile verde fries.	Good food in a relaxed atmosphere.	In good weather, I particularly enjoy the outdoor dining.	I love going here and getting take out or just a delicious slice of cheese cake.														A great place for a meal or just cocktails and a view.	The food is always good and the birthday dessert was superb.	Tasty food and beautiful decorations.	We actually sort of stumbled into this place, early one early Saturday evening, just looking for a place to have ‚Äúa great dessert‚Äú.	Food is absolutely delicious and there are so many choices!		Good, delicious food that serves food with history and smiles.	If you're looking for somewhere memorable to celebrate a special occasion, I absolutely recommend this place.	Nice place with fantastic food and desserts.	Food is delicious and dessert is a bonus!	The place offers a fantastic variety of delicious food.	Overall a great place for a date or a family dinner.	The food is always great.
Trendy places are overrated. It's covered in grease.	I prefer classic places. I prefer cleaner food.	Despite the fact that The Capital Grille is a chain, it is consistently excellent.	Their salad bar items are seasoned really well, and of course the cheesy bread is delicious.	Very upscale, but tasty in a way that you'll appreciate.	Food, service and ambiance are great!	One of my preferred places for tasty Quality Meals.	Superior restaurant, the only place I will have the dim sum.														Great food but service can be better.	it's perfect for lunch, and its super clean and has great food.	I enjoyed eating here.	Great decor, helpful staff, and a variety of modern American and European food options.	Great place to go to for a great meal.		One of my top places for tasty quality meals.	Great place for quality meals.	But menu is just beautiful and food is great too.	One of my favorite locations for tasty Quality Meals.	Food is great but this place stands above the rest because of the homemade red salsa .	On the pricier side and decently fresh.	Definitely a place worth stopping by, the food is awesome and fresh, the cost is reasonable and it is consistently clean there.
I'm not into fast food. I'm not in mood for vegetables.	I prefer more refined food. I prefer a place that serves meat.	Good food for being fast food	But I‚Äôm not a BBQ aficionado	I'm vegan for health reasons.	but it is fine dining Very good restaurants for meat lovers, you can choose from all kinds of steaks.	The food was excellent, I like my steak	I only eat Beef Brisket here because is delicious!														Food is good, open late and a drive thru !!	Plus you can get something from food life as well since it's all part of the same area Delicious burgers.	Wow, a wonderful upscale place with exceptional quality meats, great atmosphere and service	One of my preferred places for tasty Quality Meals.	But it was plenty to satisfy a craving for grilled meats, and I would come back if the dinner prices were a little cheaper.		However nothing out here compares to the meats you get in Texas - some of the meats served	Quality food at a more than reasonable price.	But menu is just beautiful and food is great too.	Excellent portions, fresh ingredients and a solid mainstream selection of things to taste.	Really nice restaurant if you want to eat some excellent meats.	One of my top places for tasty quality meals.	Great food but service can be better.
Burger and fries are not my favorite. The fish doesn't look appetizing.	I prefer a salad. I prefer meat.	The Fries were nice because they were standard and had no unique flavor, but decent fries!	The fries are the best I have ever had.	The scallops are terrific.	Fresh salad, I love bread and delicious pot pie.	I really love the Greek salad here with lamb and beef meat.	My favorite dish is the Pappardelle Pasta with the tomato basil sauce.														Spinach salad was delish!	(On top of that my sandwich was delicious :) )	I only eat Beef Brisket here because is delicious!	Lamb and beef plate is great, I get that with hummus veggies and rice.	I love the food best gyro, kitchen rotisserie is my best and with a spinach salad on the side yummyy :)		You can either choose a pita, a bowl, or a salad with your choice of protein, as well as toppings.	I also had a wedge salad which also met expectations.	Best salad I've ever had.	The Caesar salad was very good, with the dressing being the best part of the entire salad.	lamb gyro all the way.	Great meat and salad options!	I'm vegan for health reasons.
The weather is too hot for that. It doesn't have a good view.	I prefer air conditioned rooms. I prefer a more scenic place.	If you go during summer you have to sit in the terrace, lovely views.	But the scenic view is the best experience.	It's a lovely place with outdoor seating.	In good weather, I particularly enjoy the outdoor dining.	Beautiful, relaxing rooftop terrace.	I wish we could enjoy the beautiful room inside as well.														If you go during summer you have to sit in the terrace, lovely views.	Fantastic view, ambience.	The place was very comfy and cozy.	A great hideaway to relax and refuel after a shopping excursion.	Really amazing rooftop dining area, one of the best		And secondly the Lounge, where you can just a get a drink and enjoy the view.	It's a lovely place with outdoor seating.	The views both inside the main dining room and from the outdoor patio are awesome.	Comfortable dining environment.	I like the front window or the roof top, service is just nice and clean.	I like the patio outside with the lighting	This place has a lovely outdoor seating.
It doesn't have a good view. It's covered in grease.	I prefer a more scenic place. I prefer cleaner food.	It's got a nice view of the city and an open kitchen.	It has a lovely outdoor seating.	View is the best in the city.	Excellent clean environment extremely nice place to eat.	In good weather, I particularly enjoy the outdoor dining.	Great place to relax and have a bite to eat and get away from the loudness of the city.														Great place for quality meals.	One of my top places for tasty quality meals.	Food is great but this place stands above the rest because of the homemade red salsa .	Definitely a place worth stopping by, the food is awesome and fresh, the cost is reasonable and it is consistently clean there.	Overall a great place for a date or a family dinner.		it's perfect for lunch, and its super clean and has great food.	I love the food here.	the food is just as good.	One of my preferred places for tasty Quality Meals.	Food, service and ambiance are great!	Food is similar to a place in San Francisco I loved.	But menu is just beautiful and food is great too.
I don't tend to like Italian food. I prefer chicken over red meat.	I prefer Chinese food. I prefer chicken.	It was by far my favorite Italian cuisine compared to the other three	I really love the Greek salad here with lamb and beef meat.	I always get the chicken flautas entree, garlic shrimp tacos and the cheese	Chinese food here - super tasty.	Chinese food... excellent.	Relative to Chinese food, it's fantastic.														Well prepared and delicious Indian food (I ate vegetarian food).	Our first choice has been the Thai Chili Chicken, White Chili Chicken... and the list goes on!	Best Chicken	The food was good overall, we enjoy Asian food and this hit the spot.	we have been going to the restaurant for many years to enjoy their excellent authentic north indian cuisine..		Chicken flautas are always delish.	I love love love Indian food and have tested plenty of restaurants.	I always order tacos and rice.	Hands down the best Chinese food in the country I came here with a professor and another student on the Professor's recommendation.	The Peking duck is succulent and excellent as was the crispy beef tenderloin.	I always get the chicken flautas entree, garlic shrimp tacos and the cheese	Hands down best Indian food around.
I could use a nice cold beer to pair with my meal. The fish doesn't look appetizing.	I prefer a place that has beer on the menu. I prefer meat.	All were excellent, but the salmon was really something special: perfectly cooked so that it was still tender and moist, topped with crab and bernaise, on a bed of mashed celeriac.	Calamari is just good for liquor snacks, but it's too much to share with the family.	I ordered the salmon which was okay, it was cooked well	Good burgers and beer.	but it is fine dining Very good restaurants for meat lovers, you can choose from all kinds of steaks.	Excellent drinks , just okay food.														Their steaks and lamb are also worth it.	Nice food, good service, great selection of beer.	Really nice restaurant if you want to eat some excellent meats.	Excellent steak, cocktail, bread, sides, service, with a great atmosphere.	Food is good, open late and a drive thru !!		The beers on tap are all excellent.	I only eat Beef Brisket here because is delicious!	Fantastic steaks and wine.	The food was excellent, I like my steak	My preferred location for delicious Burgers.	Solid selection of on-tap craft beers and a decent food menu.	However nothing out here compares to the meats you get in Texas - some of the meats served
I see dirt spots all over. This place is overpriced.	I prefer a cleaner place. I prefer a more affordable place.	One of those rare finds, an upscale place with good deals.	OUTSIDE OF THIS SMALL PLACE IS A GOOD AREA TO EAT....	a little pricey with some dishes better than others.	The place doesn't have a great ambience, but it has high cielings, is super clean, and the staff is helpful.	Best neighborhood patio that's tucked away above the street Amazing ambience and super personal service.	Great place for quality meals.														On the pricier side and decently fresh.	Probably the best in downtown area.	A great place for a meal or just cocktails and a view.	Best neighborhood patio that's tucked away above the street	OUTSIDE OF THIS SMALL PLACE IS A GOOD AREA TO EAT....		Excellent clean environment extremely nice place to eat.	elegant, upscale and classy place for a special occasion.	Overall a great place for a date or a family dinner.	üòãüòã Good cozy place with decent food and drinks	a little pricey with some dishes better than others.	A nice place to splurge on.	Food, service and ambiance are great!
The sandwich is overstuffed. I've been trying to eat healthy and avoid fast food.	I prefer more normal sandwiches. I prefer healthy food.	Food is so good and feels like I'm eating healthy even of	Good food for being fast food	You can either choose a pita, a bowl, or a salad with your choice of protein, as well as toppings.	Fries make every sandwich and wrap taste 100x better!	You can either choose a pita, a bowl, or a salad with your choice of protein, as well as toppings.	Food is so good and feels like I'm eating healthy even of														Quesadillas are the best!!!	Food is absolutely delicious and there are so many choices!	Quality Meals, mmm, my favorite treat.	The pitas that come with the meals are warm and soft.	I always get the chicken flautas entree, garlic shrimp tacos and the cheese		Lamb and beef plate is great, I get that with hummus veggies and rice.	Fresh salad, I love bread and delicious pot pie.	First and foremost, my and girlfriend LOVE chicken sandwiches, and Dave's is by far one of thee	I love the food best gyro, kitchen rotisserie is my best and with a spinach salad on the side yummyy :)	Turkey burger and fries, both very tasty!	Spicy chix sandwich is the best.	PS the most awesome breakfast for health nuts like me.
I don't want lamb. The sandwich is overstuffed.	I prefer beef. I prefer more normal sandwiches.	Pork ribs didn't have much meat.	lamb gyro all the way.	The lamb was cooked perfectly and was well seasoned.	Turkey burger and fries, both very tasty!	I only eat Beef Brisket here because is delicious!	lamb gyro all the way.														I always get the chicken flautas entree, garlic shrimp tacos and the cheese	Chicken moist and tender.	Cheeseburgers were good, fries were wimpy.	Chicken, lamb, pork and so many cuts of beef that you will easily find the one you love.	The Impossible Burger is the best vegetarian burger I have ever had.		Fries make every sandwich and wrap taste 100x better!	The bun melts in your mouth and blends perfectly with the meat patty and any extras.	Very greasy chicken but burgers were excellent!!!	Spicy chix sandwich is the best.	My favorite selections are the Steak Tartare and the Lamb Chops.	Lamb and beef plate is great, I get that with hummus veggies and rice.	First and foremost, my and girlfriend LOVE chicken sandwiches, and Dave's is by far one of thee
This place is overpriced. I'm not a fan of rice.	I prefer a more affordable place. I prefer pasta or potatoes.	Only issue is the place is a bit pricy One of the best Indian food in Chicago.	For Indian food in the downtown area, I think this place has the best value.	Food is great but this place stands above the rest because of the homemade red salsa .	Pasta and sauce really exceed my expectations for the Price!	Food is great but this place stands above the rest because of the homemade red salsa .	We've also dined here for lunch and thre chicken parmesan														But it was plenty to satisfy a craving for grilled meats, and I would come back if the dinner prices were a little cheaper.	I recommend spaghetti with meatballs, it was delicious and the meatballs were unique, big and good.	I always get the chicken flautas entree, garlic shrimp tacos and the cheese	Food is good, lots of choices at the salad bar.	The buffet is excellent with a good combination of meat/vegetarian dishes as well as spicy/non-spicy options.		Good food for cheap.	a little pricey with some dishes better than others.	Great place for quality meals.	Quality food at a more than reasonable price.	My favorite dish is the Pappardelle Pasta with the tomato basil sauce.	I love the food best gyro, kitchen rotisserie is my best and with a spinach salad on the side yummyy :)	The price is amazing for the quality of food you get.
I don't have much cash to spare right now. I'm craving something sweeter.	I prefer a cheaper place. I prefer something sweeter.	Good food for cheap.	Best ten dollar dessert.	A nice place to splurge on.	On the pricier side and decently fresh.	I go here whenever I want something Good, filling, and great price..	Quality food at a more than reasonable price.														The specialty drinks are delightful and worth the price.	One of my preferred places for tasty Quality Meals.	the food is just as good.	Their steaks and lamb are also worth it.	Great food at a reasonable price.		Fast, inexpensive and delicious.	Superior restaurant, the only place I will have the dim sum.	Great place for quality meals.	A nice place to splurge on.	The price is amazing for the quality of food you get.	I‚Äôve been a customer for 8 years now, good food for decent prices.	Excellent drinks , just okay food.
My oldest just graduated. The fish doesn't look appetizing.	I prefer a place that is good for celebrating. I prefer meat.	The shrimp tasted so fresh!!	For dinner, I enjoyed the scallops one night and the sea bass the second.	The fish was so fresh and	I only eat Beef Brisket here because is delicious!	but it is fine dining Very good restaurants for meat lovers, you can choose from all kinds of steaks.	Really nice restaurant if you want to eat some excellent meats.														In good weather, I particularly enjoy the outdoor dining.	The place offers a fantastic variety of delicious food.	Farmers has always been one of my favorite restaurants in the area!	I love the food here.	delicious steaks and seafood...		Fantastic steaks and wine.	Overall a great place for a date or a family dinner.	The food was excellent, I like my steak	My favorite selections are the Steak Tartare and the Lamb Chops.	That plus a perfectly cooked steak makes this a great night out for any occasion.	I love going here and getting take out or just a delicious slice of cheese cake.	Good food in a relaxed atmosphere.
Thai is my favorite. I don't feel like eating fish.	I prefer Thai food. I prefer chicken.	Chinese food here - super tasty.	Everything delicious with an exception of the shrimps.	It may have literally been the best sushi I have ever had.	Chinese food here - super tasty.	Chinese food... excellent.	Chicken flautas are always delish.														The Peking duck is succulent and excellent as was the crispy beef tenderloin.	we have been going to the restaurant for many years to enjoy their excellent authentic north indian cuisine..	Hence a very good option for lunch and dinner - for the Indian tourist looking for desi food.	i've ever had but provides variety compared to Naf naf and Roti	I always order tacos and rice.		I love love love Indian food and have tested plenty of restaurants.	Relative to Chinese food, it's fantastic.	Hands down best Indian food around.	Dim sum is excellent, main course - chicken - was not as spicey as I thought.	Our first choice has been the Thai Chili Chicken, White Chili Chicken... and the list goes on!	Definitely try their panang curry, chicken pad Thai	I always get the chicken flautas entree, garlic shrimp tacos and the cheese
Food trucks are usually too greasy. The beef looks raw.	I prefer a more formal restaurant. I prefer my steak well done.	Very greasy chicken but burgers were excellent!!!	The Grill has solid food.	Pork ribs didn't have much meat.	The food was excellent, I like my steak	Excellent steak and service!	Steak was seasoned just the way I like it and a perfect medium rare to rare like requested.														A beautiful and classy Steakhouse, their signature balsamic rub on the steak is to die for, like all client focused business their dedication and touch of personized dessert is sweet enough for anyone.	Excellent steak, cocktail, bread, sides, service, with a great atmosphere.	Delicious filet mignon and friendly service, great for date night.	but it is fine dining Very good restaurants for meat lovers, you can choose from all kinds of steaks.	One of the best steakhouses I have been to!		My favorite selections are the Steak Tartare and the Lamb Chops.	Delicious sirloin and great selection of sides.	All four of our steaks were cooked to perfection, and the service was very good!	Was probably the best steak I've ever had along with the mashed potatoes that we asked for.	Amazing steak and service!	Steaks were cooked perfect to our liking.	Best NY steak on the planet.
It doesn't have a good view. That seems super greasy.	I prefer a more scenic place. I prefer lighter food.	I guess I didn't expect it to be very good because it has a great view already, so the food mustn't be good.	It's got a nice view of the city and an open kitchen.	View is the best in the city.	In good weather, I particularly enjoy the outdoor dining.	Great place to relax and have a bite to eat and get away from the loudness of the city.	Good food in a relaxed atmosphere.														A great place for a meal or just cocktails and a view.	One of my top places for tasty quality meals.	Quality Meals and the scene at this spot is excellent.	One of my preferred places for tasty Quality Meals.	Overall a great place for a date or a family dinner.		I love the food here.	Food is similar to a place in San Francisco I loved.	OUTSIDE OF THIS SMALL PLACE IS A GOOD AREA TO EAT....	Certainly a place worth stopping over, the food is awesome and fresh, the costs are reasonable and it is constantly neat here.	Pleasant outdoor dining good food good service Good place with a calm atmosphere.	the food is just as good.	Pleasant atmosphere and best deep dish pizza
I don't tend to like Italian food. It's covered in grease.	I prefer Chinese food. I prefer cleaner food.	It was one of my favorite Italian dishes I‚Äôve ever tried.	The best Italian food I've had in Chicago, so far.	It was by far my favorite Italian cuisine compared to the other three	Chinese food here - super tasty.	Chinese food... excellent.	Relative to Chinese food, it's fantastic.														I always get the chicken flautas entree, garlic shrimp tacos and the cheese	My favorite dish is the Pappardelle Pasta with the tomato basil sauce.	we have been going to the restaurant for many years to enjoy their excellent authentic north indian cuisine..	Well prepared and delicious Indian food (I ate vegetarian food).	Sushi quality is high and real, fresh fish.		I love love love Indian food and have tested plenty of restaurants.	I always order tacos and rice.	Fantastic perfectly executed high end Chinese food.	The food was good overall, we enjoy Asian food and this hit the spot.	Hands down the best Chinese food in the country I came here with a professor and another student on the Professor's recommendation.	the 'Shanghai three fried rice' were all wonderful.	Great location for delicious Chinese food.
I'm with my daughter's soccer team. Italian food doesn't appeal to me.	I prefer a place with a kids' menu. I prefer Thai or Indian food.	I grew up on the east coast eating a lot of good Italian food both in restaurants and homemade by family.	It was by far my favorite Italian cuisine compared to the other three	My daughter and I had the asada quesadilla and Chile verde fries.	Definitely try their panang curry, chicken pad Thai	Superior restaurant, the only place I will have the dim sum.	we have been going to the restaurant for many years to enjoy their excellent authentic north indian cuisine..														I always get the chicken flautas entree, garlic shrimp tacos and the cheese	A good authentic restaurant with decent inside decor.	Great place to go to for a great meal.	Great place for quality meals.	Food, service and ambiance are great!		I love Indian Garden and dine there whenever I'm in the area.	Real authentic Indian food, no cheesy Bollywood decor Tastefully decorated, the restaurant immediately feels authentic when you step inside.	I highly recommend Shanghai Terrace over TAO or any hi end Chinese restaurant in the city.	The food was good overall, we enjoy Asian food and this hit the spot.	Chinese food here - super tasty.	Our first choice has been the Thai Chili Chicken, White Chili Chicken... and the list goes on!	I usually order to-go, but there is indoor seating if you prefer to dine-in (as of 10/20, although capacity is reduced due to COVID)
I'm not in mood for vegetables. Burger and fries are not my favorite.	I prefer a place that serves meat. I prefer a salad.	But I‚Äôm not a BBQ aficionado	were truly from the smoker, and they had the feel of mostly grilled ribs to me, which I do not like.	The Fries were nice because they were standard and had no unique flavor, but decent fries!	I really love the Greek salad here with lamb and beef meat.	Great meat and salad options!	I always get the chicken flautas entree, garlic shrimp tacos and the cheese														Fresh salad, I love bread and delicious pot pie.	What I ordered: A large Caesar salad and a large bowl of tomato soup.	Superior restaurant, the only place I will have the dim sum.	One of my preferred places for tasty Quality Meals.	Delicious sirloin and great selection of sides.		Food is good, lots of choices at the salad bar.	The Caesar salad was very good, with the dressing being the best part of the entire salad.	Best salad I've ever had.	I love the food best gyro, kitchen rotisserie is my best and with a spinach salad on the side yummyy :)	The food was excellent, I like my steak	We love their steaks, Alfredo chicken fettucine, tiramisu and salads.	but it is fine dining Very good restaurants for meat lovers, you can choose from all kinds of steaks.
Not a huge fan of Mexican cuisine. The beef looks raw.	I prefer Italian food. I prefer my steak well done.	Always amazing, high quality and real Mexican cuisine.	There was the best Brazilian BBQ which I‚Äôve ever had.	Probably the best Mexican fast food place I've ever had.	The food was excellent, I like my steak	I really love the Greek salad here with lamb and beef meat.	It was by far my favorite Italian cuisine compared to the other three														My favorite selections are the Steak Tartare and the Lamb Chops.	Eggplant Parmesan was perfect, tender rich and robust.	Love me a great Malbec and ribeye and this hit the spot!	We've also dined here for lunch and thre chicken parmesan	Steak was delicious.		It was one of my favorite Italian dishes I‚Äôve ever tried.	My favorite dish is the Pappardelle Pasta with the tomato basil sauce.	The best Italian food I've had in Chicago, so far.	Steak was seasoned just the way I like it and a perfect medium rare to rare like requested.	I really enjoyed the sausage plate and my wife loved the shrimp linguini.	The Caesar salad was very good, with the dressing being the best part of the entire salad.	Steaks were cooked perfect to our liking.
I'm not into fast food. I've never had the stomach for vegan cuisine.	I prefer more refined food. I prefer meat and fish.	I'm vegan for health reasons.	The Impossible Burger is the best vegetarian burger I have ever had.	I only eat Beef Brisket here because is delicious!	delicious steaks and seafood...	Food is always great...lot of variety in veg and non	Food is absolutely delicious and there are so many choices!														I am a huge fan of steaks, so i love coming here for my month protein.	Food is good and wine is OK.	Steak was seasoned just the way I like it and a perfect medium rare to rare like requested.	However nothing out here compares to the meats you get in Texas - some of the meats served	Steak is like butter!		I only eat Beef Brisket here because is delicious!	The food was excellent, I like my steak	Everything delicious with an exception of the shrimps.	My favorite selections are the Steak Tartare and the Lamb Chops.	Steaks were cooked perfect to our liking.	Meat was well seasoned and well cooked.	but it is fine dining Very good restaurants for meat lovers, you can choose from all kinds of steaks.
This dish seems too bizarre. Sushi is nasty.	I prefer traditional cuisine. I prefer cooked food.	It may have literally been the best sushi I have ever had.	Would not be my top sashimi restaurant, but for the convenience, it was worth it.	The sushi was fair but not very special and the menu looked very standard.	Food is absolutely delicious and there are so many choices!	Food is always great...lot of variety in veg and non	Delicious and a wide variety of dishes.														I really love the Greek salad here with lamb and beef meat.	Chinese food here - super tasty.	Lamb and beef plate is great, I get that with hummus veggies and rice.	In good weather, I particularly enjoy the outdoor dining.	We started with the Cast Iron Mediterranean Mussels, tasty with garlic and herbs.		I grew up on the east coast eating a lot of good Italian food both in restaurants and homemade by family.	I only eat Beef Brisket here because is delicious!	My favorite dish is the Pappardelle Pasta with the tomato basil sauce.	It was by far my favorite Italian cuisine compared to the other three	delicious steaks and seafood...	Good, delicious food that serves food with history and smiles.	Well prepared and delicious Indian food (I ate vegetarian food).
The beef looks raw. I've never had the stomach for vegan cuisine.	I prefer my steak well done. I prefer meat and fish.	Pork ribs didn't have much meat.	The Impossible Burger is the best vegetarian burger I have ever had.	The meat is absolutely delicious, awesomely seasoned and beautifully cooked.	Steak was seasoned just the way I like it and a perfect medium rare to rare like requested.	Steaks were cooked perfect to our liking.	The food was excellent, I like my steak														Delicious sirloin and great selection of sides.	The meat is absolutely delicious, awesomely seasoned and beautifully cooked.	I ordered the salmon which was okay, it was cooked well	Was probably the best steak I've ever had along with the mashed potatoes that we asked for.	I had a ribeye that was amazing.		Steak was delicious.	I only eat Beef Brisket here because is delicious!	My favorite selections are the Steak Tartare and the Lamb Chops.	Steak is like butter!	Meat was well seasoned and well cooked.	delicious steaks and seafood...	Great steak and salmon.
I don't feel like eating appetizers. This place is overpriced.	I prefer to get straight to the main course. I prefer a more affordable place.	Excellent lunch buffet at a reasonable price.	a little pricey with some dishes better than others.	The prices are high but appropriate; overall, I rate this restaurant as a good value for fine dining, perfect for a business dinner or special occasion.	It's a great stop in the city and it is along the bustling magnificent mile.	A great place for a meal or just cocktails and a view.	We were going to go the McCormicks and Smith‚Äôs but ended up here which was a delight.														Best to make a reservation because it can be a popular place, mainly because of the breathtaking views of the lake and the city!!	But the scenic view is the best experience.	Great place to grab a cocktail too.	Great spot to catch dinner b4 show 3 long blocks away, winter fair, and before hitting the local bar scene.	Much better experience than skyline and free view... unless you paying for a drink.		OUTSIDE OF THIS SMALL PLACE IS A GOOD AREA TO EAT....	One of the best spots of its kind in the area.	one of the best spots of its kind in the area.	Overall a great place for a date or a family dinner.	A little more pricey than the typical dinner spot, but the location and service are worth it.	Definitely a great spot to grab a drink and some city views where other that the occasional siren you feel miles above the hustle and bustle of Michigan Avenue below!	I usually just get one or two drinks and either a dessert or a appetizer (because of the cost) but the view is out of the world!
That's not a very filling food. Today is not a drinking day.	I prefer a more heavy food. I prefer non-alcoholic cocktails.	Drinks are all well done.	Nice dinner setting, with huge portions.	Food is good and wine is OK.	Excellent drinks , just okay food.	Delicious but also more of a brunch type of drink.	Drinks are all well done.														I usually just get one or two drinks and either a dessert or a appetizer (because of the cost) but the view is out of the world!	Food was great and cocktails are solid!	I had two IPAs, a PB&j sour and a stout with maple and coffee.	Food is good, lots of choices at the salad bar.	The food is delicious as well as the cocktails!		Good food and drinks.	I had the steak and eggs with a dark and stormy since I love rum.	Food is delicious and dessert is a bonus!	The specialty drinks are delightful and worth the price.	Drinks were tasty.	Food is good and wine is OK.	The foods are delicious and with the calories on the menu you can eat whatever match to your diet.
I have quite a big stash of cash available. We're taking granpa and grandma to lunch.	I prefer a more expensive place. I prefer a place that's good for seniors.	Loads of meat and a very nice buffet.	I had a very nice meal with my family.	looking forward to coming back with my relatives.	Overall a great place for a date or a family dinner.	Best neighborhood patio that's tucked away above the street Amazing ambience and super personal service.	A great place for a meal or just cocktails and a view.														The atmosphere seems like a place my parents (or grandparents) would have enjoyed but the food and service was great.	Great place for quality meals.	elegant, upscale and classy place for a special occasion.	A little more pricey than the typical dinner spot, but the location and service are worth it.	Is a great place to go, the structure of the restaurant is nice Excellent!		Their outdoor seating is informal and good for young folks.	It is a high end place that is family friendly.	Bit they have outdoor seating and its comfortable Great place for dinner.	Very small place, but the food is great and the prices are affordable.	The place doesn't have a great ambience, but it has high cielings, is super clean, and the staff is helpful.	üòãüòã Good cozy place with decent food and drinks	Food, service and ambiance are great!
My doctor told me I needed to lower my cholesterol. I don't feel like eating appetizers.	I prefer a more health-conscious place. I prefer to get straight to the main course.	Food is so good and feels like I'm eating healthy even of	The balsamic dressing weighed the salad down and I found myself feeling full quickly.	I'm vegan for health reasons.	One of the best spots of its kind in the area.	one of the best spots of its kind in the area.	This spot is the one I always prefer.														Great place to grab a cocktail too.	One of my favorite places!!	Both were good, and were different from anything else we‚Äôd had, but I felt the preceding courses were better.	Excellent spot to spend time alone or talk business.	But the scenic view is the best experience.		It's a great stop in the city and it is along the bustling magnificent mile.	A great place for a meal or just cocktails and a view.	Definitely a great spot to grab a drink and some city views where other that the occasional siren you feel miles above the hustle and bustle of Michigan Avenue below!	Overall a great place for a date or a family dinner.	Great spot for a special occasion or celebration especially on a beautiful summer night.	If you're a tourist, I think it's a good place to stop before or after seeing the view from the top of the Hancock tower!	OUTSIDE OF THIS SMALL PLACE IS A GOOD AREA TO EAT....
I try to limit my meat intake. Burger and fries are not my favorite.	I prefer a more vegetarian place. I prefer a salad.	Turkey burger and fries, both very tasty!	I ordered cheeseburgers and their delicious fries!	Fries make every sandwich and wrap taste 100x better!	I really love the Greek salad here with lamb and beef meat.	Great meat and salad options!	Such a great selection of vegetarian & vegan options too!														Large selection of vegetarian and non-vegetarian meals.	The salad bar is, in fact, exquisite.	We love their steaks, Alfredo chicken fettucine, tiramisu and salads.	One of my top places for tasty quality meals.	Really nice restaurant if you want to eat some excellent meats.		Had good vegetarian options as well.	Food is good, lots of choices at the salad bar.	I love the food best gyro, kitchen rotisserie is my best and with a spinach salad on the side yummyy :)	They have vegan options, fresh produce, an interesting, ever-changing menu selection, and the most fabulous Mac and Cheese.	Best salad I've ever had.	One of my preferred places for tasty Quality Meals.	Their salad bar items are seasoned really well, and of course the cheesy bread is delicious.
I try to limit my meat intake. My budget isn't very high.	I prefer a more vegetarian place. I prefer a cheaper place.	Yes a good steak is expensive!	Excellent 32 oz steak which is great for 2.	I am a huge fan of steaks, so i love coming here for my month protein.	Great place for quality meals.	Such a great selection of vegetarian & vegan options too!	Had good vegetarian options as well.														Great place to go to for a great meal.	Quality food at a more than reasonable price.	Great food at a reasonable price.	but it is fine dining Very good restaurants for meat lovers, you can choose from all kinds of steaks.	Large selection of vegetarian and non-vegetarian meals.		Their steaks and lamb are also worth it.	I go here whenever I want something Good, filling, and great price..	One of my top places for tasty quality meals.	One of my preferred places for tasty Quality Meals.	Really nice restaurant if you want to eat some excellent meats.	Superior restaurant, the only place I will have the dim sum.	For Indian food in the downtown area, I think this place has the best value.
I don't feel like eating fish. There are some seafood that don't sit well with me.	I prefer chicken. I prefer beef or chicken.	Everything delicious with an exception of the shrimps.	Both lobster bisque and steak were little salty for me but overall great food and nice that they were served hot!	Sushi quality is high and real, fresh fish.	Chicken flautas are always delish.	I only eat Beef Brisket here because is delicious!	Chicken moist and tender.														Lamb and beef plate is great, I get that with hummus veggies and rice.	My favorite selections are the Steak Tartare and the Lamb Chops.	I always get the chicken flautas entree, garlic shrimp tacos and the cheese	Meat was well seasoned and well cooked.	Very greasy chicken but burgers were excellent!!!		Best Chicken	Turkey burger and fries, both very tasty!	Chicken Picatta was basic, but flavorful.	Chicken, lamb, pork and so many cuts of beef that you will easily find the one you love.	The chicken, on the other hand was delicious and juicy - the sirloin was great too!	Steak was delicious.	lamb gyro all the way.
Not a huge fan of Mexican cuisine. Today is not a drinking day.	I prefer Italian food. I prefer non-alcoholic cocktails.	There was the best Brazilian BBQ which I‚Äôve ever had.	Best Mexican food love this place!	Food is great but this place stands above the rest because of the homemade red salsa .	It was by far my favorite Italian cuisine compared to the other three	Excellent drinks , just okay food.	Food is good and wine is OK.														Wine, caipirinha, and a desert.	My French Martini was outstanding.	Best Italian food!	I really love the Greek salad here with lamb and beef meat.	All they need is homemade bread, saganaki and ouzo.....		I grew up on the east coast eating a lot of good Italian food both in restaurants and homemade by family.	I liked my red velvet martini, and the calamari.	Greek food, mmm, awesome.	We shared penne vodka and had a couple of drinks.	Great food with traditional Italian favorites as well as some more inventive menu items.	It was one of my favorite Italian dishes I‚Äôve ever tried.	Delicious but also more of a brunch type of drink.
Didn't seem kid-friendly. I'm not in the mood for ramen.	I prefer a family-friendly place. I prefer a more fancy restaurant.	Everything was delicious, though I was disappointed in the veal, tough and would have been better over pasta.	The dessert was the highlight for me.	Got some rice, bean and cheese burritos for the kids and they enjoyed them.	Overall a great place for a date or a family dinner.	Superior restaurant, the only place I will have the dim sum.	Food, service and ambiance are great!														Great place to go to for a great meal.	The best restaurant around here.	This is an affordable, kid-friendly place specialized in burgers and American food.	This is a 4 star, kid-friendly place for American food, seafood and steaks which also serves alcohol.	One of my preferred places for tasty Quality Meals.		A great place for a meal or just cocktails and a view.	A great place for happy hour and lunch.	This is a 4 star, kid-friendly, vegetarian-friendly place that serves American food and desserts which also serves alcohol.	Like a restaurant in Washington I liked.	OUTSIDE OF THIS SMALL PLACE IS A GOOD AREA TO EAT....	This is a 4 star, kid-friendly, vegetarian-friendly place that serves Italian food and pizza which also serves alcohol.	I like to go with friends to this restaurant with my highest recommendations.
I eat salads a few times a week but would rather have steak. I'm trying to lose weight.	I prefer a place with great steaks. I prefer lighter food.	Food is so good and feels like I'm eating healthy even of	I'm vegan for health reasons.	The balsamic dressing weighed the salad down and I found myself feeling full quickly.	I only eat Beef Brisket here because is delicious!	The food was excellent, I like my steak	but it is fine dining Very good restaurants for meat lovers, you can choose from all kinds of steaks.														Delicious sirloin and great selection of sides.	Really nice restaurant if you want to eat some excellent meats.	Might seem pricey, but the portions are great and the steaks are mouthwatering.	One of my top places for tasty quality meals.	Excellent steak, cocktail, bread, sides, service, with a great atmosphere.		Their steaks and lamb are also worth it.	In good weather, I particularly enjoy the outdoor dining.	That plus a perfectly cooked steak makes this a great night out for any occasion.	Everything in the buffet is always high quality, has great flavor and a good amount of heat.	However nothing out here compares to the meats you get in Texas - some of the meats served	Fantastic steaks and wine.	Wonderful chain steak house with consistent quality of food and service.
I'm not a fan of rice. That seems super greasy.	I prefer pasta or potatoes. I prefer lighter food.	Rice in the rice pudding is so hard.	The creamed spinach is tasty, though.	Dim sum is excellent, main course - chicken - was not as spicey as I thought.	My favorite dish is the Pappardelle Pasta with the tomato basil sauce.	Lamb and beef plate is great, I get that with hummus veggies and rice.	I always order tacos and rice.														You can either choose a pita, a bowl, or a salad with your choice of protein, as well as toppings.	Rigatoni with Vodka Sauce was perfect, especially with the addition of a meatball.	I recommend spaghetti with meatballs, it was delicious and the meatballs were unique, big and good.	Mashed potatoes were good.	I can say the same about the whipped potatoes.		Fresh salad, I love bread and delicious pot pie.	Both are delicious, I loved the tzatziki sauce and the orzo pasta.	I love the food best gyro, kitchen rotisserie is my best and with a spinach salad on the side yummyy :)	Quesadillas are the best!!!	I always get the chicken flautas entree, garlic shrimp tacos and the cheese	Food is always great...lot of variety in veg and non	Tomato bisque and grilled cheese were excellent too.
My doctor told me I needed to lower my cholesterol. I eat salads a few times a week but would rather have steak.	I prefer a more health-conscious place. I prefer a place with great steaks.	I'm vegan for health reasons.	Lamb and beef plate is great, I get that with hummus veggies and rice.	Food is so good and feels like I'm eating healthy even of	but it is fine dining Very good restaurants for meat lovers, you can choose from all kinds of steaks.	Their steaks and lamb are also worth it.	Wonderful chain steak house with consistent quality of food and service.														Excellent steak, cocktail, bread, sides, service, with a great atmosphere.	Superior restaurant, the only place I will have the dim sum.	Overall a great place for a date or a family dinner.	One of my top places for tasty quality meals.	Great place for quality meals.		Really nice restaurant if you want to eat some excellent meats.	Good place, good burgers.	Wow, a wonderful upscale place with exceptional quality meats, great atmosphere and service	The food was excellent, I like my steak	Great place to go to for a great meal.	Best NY steak on the planet.	My preferred location for delicious Burgers.
Food trucks are usually too greasy. We're taking granpa and grandma to lunch.	I prefer a more formal restaurant. I prefer a place that's good for seniors.	Food is good, open late and a drive thru !!	Very greasy chicken but burgers were excellent!!!	THE DRIVE THROUGH IS QUICK AND THE EATING	Food, service and ambiance are great!	Superior restaurant, the only place I will have the dim sum.	The atmosphere seems like a place my parents (or grandparents) would have enjoyed but the food and service was great.														Great decor, helpful staff, and a variety of modern American and European food options.	Quaint, nice staff and very good comfort food.	Excellent steak, cocktail, bread, sides, service, with a great atmosphere.	The buffet is excellent with a good combination of meat/vegetarian dishes as well as spicy/non-spicy options.	It was a classy restaurant with great food varieties.		Overall a great place for a date or a family dinner.	The prices are high but appropriate; overall, I rate this restaurant as a good value for fine dining, perfect for a business dinner or special occasion.	It's still a nice restaurant with good food and helpful staff.	Delicious food, great service every time and the decor and atmosphere of the restaurant is so charming and warm.	Great, old style Italian food with excellent service from the front door all the way through dessert.	Is a great place to go, the structure of the restaurant is nice Excellent!	A great place for a meal or just cocktails and a view.
That's somewhat unimaginative. My oldest just graduated.	I prefer a more creative place. I prefer a place that is good for celebrating.	We are high school sweet hearts who never got married .	I celebrated my graduation today in this fine place.	Took my daughter for a birthday lunch.	If you're looking for somewhere memorable to celebrate a special occasion, I absolutely recommend this place.	A great place for a meal or just cocktails and a view.	Overall a great place for a date or a family dinner.														Nice views, food and drinks to enjoy a late night on the town.	I definitely recommend this place if view and good cocktails is something that you desire.	I love going here and getting take out or just a delicious slice of cheese cake.	This is a great place to a business or special moment dinner.	This is a great place for friends or a cute date night.		If i live in Chicago this would be the place I'd go to for every celebration.	elegant, upscale and classy place for a special occasion.	Great spot for a special occasion or celebration especially on a beautiful summer night.	üòãüòã Good cozy place with decent food and drinks	We actually sort of stumbled into this place, early one early Saturday evening, just looking for a place to have ‚Äúa great dessert‚Äú.	An excellent place to grab a cocktail or an after dinner desert and people watch!	And secondly the Lounge, where you can just a get a drink and enjoy the view.
I don't have much cash to spare right now. Not a huge fan of Mexican cuisine.	I prefer a cheaper place. I prefer Italian food.	I grew up on the east coast eating a lot of good Italian food both in restaurants and homemade by family.	Good food for cheap.	Pasta and sauce really exceed my expectations for the Price!	Great food with traditional Italian favorites as well as some more inventive menu items.	The best Italian food I've had in Chicago, so far.	My go-to place for fast Greek food!														Great, old style Italian food with excellent service from the front door all the way through dessert.	Superior restaurant, the only place I will have the dim sum.	It was by far my favorite Italian cuisine compared to the other three	Quality food at a more than reasonable price.	Great place for quality meals.		Greek food and the atmosphere here is quality.	With so many Italian restaurant choices in the area, so glad we went here.	Great food at a reasonable price.	Food is great but this place stands above the rest because of the homemade red salsa .	Great Italian restaurant, affordable price and great menu selection	The price is amazing for the quality of food you get.	An Italian restaurant with great atmosphere and food One of my favorite italian places in the heart of Chicago.
Their dishes look over-seasoned. I ate a lot yesterday so I'd like to eat lighter today.	I prefer food that is more natural. I prefer a more light restaurant.	The food was delicious and so satisfying - I particularly enjoyed the Korean Fried Cauliflower.	I love the food best gyro, kitchen rotisserie is my best and with a spinach salad on the side yummyy :)	I ordered the spinach omelette with hash browns, it was amazing and filling.	But menu is just beautiful and food is great too.	Food is absolutely delicious and there are so many choices!	Food is great but this place stands above the rest because of the homemade red salsa .														Food, service and ambiance are great!	the food is just as good.	Quality food at a more than reasonable price.	Great food but service can be better.	The price is amazing for the quality of food you get.		I go to fabulous restaurants on a regular basis, Michelin stars, Top Chef, etc, so food wise, excellent of course.	Everything in the buffet is always high quality, has great flavor and a good amount of heat.	Good food in a relaxed atmosphere.	In good weather, I particularly enjoy the outdoor dining.	but it is fine dining Very good restaurants for meat lovers, you can choose from all kinds of steaks.	Superior restaurant, the only place I will have the dim sum.	The foods are delicious and with the calories on the menu you can eat whatever match to your diet.
I'm not bothered by fashion places. Trendy places don't stay interesting for long.	I prefer a more classic place. I prefer classic places.	Always stay downtown and have been to many amazing places and local gems!	as well I've never seen a place look so fresh but also so douchy lol.	The cozy and fancy decoration is good for dating or business.	Overall a great place for a date or a family dinner.	Superior restaurant, the only place I will have the dim sum.	A great place for a meal or just cocktails and a view.														A great place for happy hour and lunch.	My preferred location for delicious Burgers.	One of my favorite locations for tasty Quality Meals.	One of my preferred places for tasty Quality Meals.	Like a restaurant in Washington I liked.		elegant, upscale and classy place for a special occasion.	Great place to go to for a great meal.	Great place to grab a cocktail too.	Probably the best in downtown area.	Food, service and ambiance are great!	menu is like a cafe in boston i loved.	Great place for quality meals.
Food trucks are usually too greasy. American style food is very greasy.	I prefer a more formal restaurant. I prefer lighter food.	Everything in the buffet is always high quality, has great flavor and a good amount of heat.	Very greasy chicken but burgers were excellent!!!	Despite the fact that The Capital Grille is a chain, it is consistently excellent.	In good weather, I particularly enjoy the outdoor dining.	Everything in the buffet is always high quality, has great flavor and a good amount of heat.	Superior restaurant, the only place I will have the dim sum.														The restaurant has a great view and both choices of food were simply delicious and sophisticated.	I always order tacos and rice.	The food here is very good like how you can get whatever toppings you want on your gyro without an extra charge.	The prices are high but appropriate; overall, I rate this restaurant as a good value for fine dining, perfect for a business dinner or special occasion.	The pitas that come with the meals are warm and soft.		I go to fabulous restaurants on a regular basis, Michelin stars, Top Chef, etc, so food wise, excellent of course.	Good food in a relaxed atmosphere.	Food, service and ambiance are great!	The buffet is excellent with a good combination of meat/vegetarian dishes as well as spicy/non-spicy options.	I love the food best gyro, kitchen rotisserie is my best and with a spinach salad on the side yummyy :)	The Grill On The Alley service and atmosphere	I always get the chicken flautas entree, garlic shrimp tacos and the cheese
I have a couple of children with me. The table is not even clean.	I prefer a place that is more child friendly. I prefer a clean table.	The rest of my table also enjoyed their meals.	Restaurant was pretty clean.	Very clean inside with funky decor.	Great place for a special dinner, room for a medium size crowd.	This is a 4 star, casual, kid-friendly place for Brazilian food and steaks with good parking options which also serves alcohol.	Bit they have outdoor seating and its comfortable Great place for dinner.														Food, service and ambiance are great!	Great cocktail lounge as well.	A great place for a meal or just cocktails and a view.	This is a 4 star, kid-friendly, vegetarian-friendly place that serves Italian food and pizza which also serves alcohol.	elegant, upscale and classy place for a special occasion.		Great place for quality meals.	This is a 4 star, kid-friendly place specialized in Italian which also serves alcohol.	And secondly the Lounge, where you can just a get a drink and enjoy the view.	Overall a great place for a date or a family dinner.	quality meals and the setting at this place is excellent.	Their outdoor seating is informal and good for young folks.	The place doesn't have a great ambience, but it has high cielings, is super clean, and the staff is helpful.
I'm not a meat eater. Burgers and fries are too heavy.	I prefer a vegetarian place. I prefer a light meal.	Cheeseburgers were good, fries were wimpy.	Pork ribs didn't have much meat.	I ordered cheeseburgers and their delicious fries!	Had good vegetarian options as well.	but it is fine dining Very good restaurants for meat lovers, you can choose from all kinds of steaks.	One of my preferred places for tasty Quality Meals.														I love Indian Garden and dine there whenever I'm in the area.	I love the food best gyro, kitchen rotisserie is my best and with a spinach salad on the side yummyy :)	Their steaks and lamb are also worth it.	great place for a quick meal.	One of my favorite locations for tasty Quality Meals.		Such a great selection of vegetarian & vegan options too!	Great place for quality meals.	One of my top places for tasty quality meals.	Superior restaurant, the only place I will have the dim sum.	I only eat Beef Brisket here because is delicious!	Really nice restaurant if you want to eat some excellent meats.	Large selection of vegetarian and non-vegetarian meals.
Their dishes look over-seasoned. It's covered in grease.	I prefer food that is more natural. I prefer cleaner food.	The food was delicious, prepared well, and they definitely care about the look with beautiful orientation and each plate wiped clean before being served.	The Grill has solid food.	a little pricey with some dishes better than others.	Food is always great...lot of variety in veg and non	Food is absolutely delicious and there are so many choices!	Food is so good and feels like I'm eating healthy even of														Food:	Food is fantastic!	Fresh salad, I love bread and delicious pot pie.	Quality Meals, mmm, my favorite treat.	Well prepared and delicious Indian food (I ate vegetarian food).		I'm vegan for health reasons.	Food is soo delicious.	Food is good and wine is OK.	I only eat Beef Brisket here because is delicious!	Food is delicious and dessert is a bonus!	Lamb and beef plate is great, I get that with hummus veggies and rice.	Food is great.
I'm too tired and hungry to wait. I try to limit my meat intake.	I prefer a place with faster service. I prefer a more vegetarian place.	Food is so good and feels like I'm eating healthy even of	I finished half of it for lunch and then have for dinner.	I'm vegan for health reasons.	Great food but service can be better.	Great place for quality meals.	Such a great selection of vegetarian & vegan options too!														Great place to go to for a great meal.	Wonderful chain steak house with consistent quality of food and service.	Had good vegetarian options as well.	Their steaks and lamb are also worth it.	but it is fine dining Very good restaurants for meat lovers, you can choose from all kinds of steaks.		Good place, good burgers.	Superior restaurant, the only place I will have the dim sum.	Really nice restaurant if you want to eat some excellent meats.	It's a good place to eat, has a drive thru	Wow, a wonderful upscale place with exceptional quality meats, great atmosphere and service	great place for a quick meal.	I‚Äôve been a customer for 8 years now, good food for decent prices.
This dish seems too bizarre. That seems super greasy.	I prefer traditional cuisine. I prefer lighter food.	Pasta and sauce really exceed my expectations for the Price!	The Au Gratin Potatoes side was incredibly rich and cheesy.	Dim sum is excellent, main course - chicken - was not as spicey as I thought.	Delicious and a wide variety of dishes.	In good weather, I particularly enjoy the outdoor dining.	I grew up on the east coast eating a lot of good Italian food both in restaurants and homemade by family.														I always order tacos and rice.	Chinese food here - super tasty.	I've had at other high class restaurants, but the chimichurri and sun dried tomato puree that accompanied	I always get the chicken flautas entree, garlic shrimp tacos and the cheese	I go to fabulous restaurants on a regular basis, Michelin stars, Top Chef, etc, so food wise, excellent of course.		It was by far my favorite Italian cuisine compared to the other three	Food is always great...lot of variety in veg and non	My favorite dish is the Pappardelle Pasta with the tomato basil sauce.	Lamb and beef plate is great, I get that with hummus veggies and rice.	I only eat Beef Brisket here because is delicious!	Food is absolutely delicious and there are so many choices!	I love the food best gyro, kitchen rotisserie is my best and with a spinach salad on the side yummyy :)
I have quite a big stash of cash available. I've had my fair share of pizza already.	I prefer a more expensive place. I prefer something more original.	My husband and I each got our own personal pizza.	I received fresh food which is always a good thing.	Pizza was delicious...	Overall a great place for a date or a family dinner.	Superior restaurant, the only place I will have the dim sum.	Great place for quality meals.														Spendy and could be a more relaxed atmosphere.	Probably the best in downtown area.	I go here whenever I want something Good, filling, and great price..	feels similar to a restaurant in philadelphia that i enjoyed visiting.	The prices are high but appropriate; overall, I rate this restaurant as a good value for fine dining, perfect for a business dinner or special occasion.		elegant, upscale and classy place for a special occasion.	A great place for a meal or just cocktails and a view.	Quality food at a more than reasonable price.	On the pricier side and decently fresh.	A little more pricey than the typical dinner spot, but the location and service are worth it.	Very small place, but the food is great and the prices are affordable.	Best neighborhood patio that's tucked away above the street Amazing ambience and super personal service.
That's somewhat unimaginative. Today is not a drinking day.	I prefer a more creative place. I prefer non-alcoholic cocktails.	Drinks are all well done.	This is the perfect place to celebrate an important day.	Delicious but also more of a brunch type of drink.	Excellent drinks , just okay food.	I definitely recommend this place if view and good cocktails is something that you desire.	Delicious but also more of a brunch type of drink.														Great food and cocktails!	Amazing martinis, great happy hour, wonderful staff!	An excellent cocktail, nice service and very good food.	Beautiful location, spectacular view, drinks available in variety, we tried there starters were pretty decent.	An excellent place to grab a cocktail or an after dinner desert and people watch!		The specialty drinks are delightful and worth the price.	Great place to grab a cocktail too.	A great place for a meal or just cocktails and a view.	The bar staff is great with a good liquor selection.	Great cocktails and food.	Atmosphere is wonderful and the bar is always attentive to keep your not waiting around if you want another glass.	Drinks are all well done.
I'm too tired and hungry to wait. I could use a nice cold beer to pair with my meal.	I prefer a place with faster service. I prefer a place that has beer on the menu.	Had appetizers and a bottle of wine, perfect way to end the day.	I finished half of it for lunch and then have for dinner.	but then after steak, finishing glass of wine	Superior service, excellent food and drinks.	The bar staff is great with a good liquor selection.	We had a few local beers while here, but service was a bit on the slow side.														Good service and nice drinks.	Solid selection of on-tap craft beers and a decent food menu.	Good burgers and beer.	It's a good place to eat, has a drive thru	Food, service and ambiance are great!		The beers on tap are all excellent.	Food is good, open late and a drive thru !!	Atmosphere is wonderful and the bar is always attentive to keep your not waiting around if you want another glass.	Nice food, good service, great selection of beer.	Great food but service can be better.	Happy hour is amazing here.	Excellent drinks , just okay food.
All of the produce that I eat comes straight from the farm. This stuff doesn't look fresh.	I prefer local and organic ingredients. I prefer a fresher place.	The Field Greens, Butter Leaf Lettuce, Heirloom Tomatoes salad was fresh and well displayed.	On the pricier side and decently fresh.	The Chicken Parmesan was extremely soft and juicy.	Excellent portions, fresh ingredients and a solid mainstream selection of things to taste.	On the pricier side and decently fresh.	I go here whenever I want something Good, filling, and great price..														I love their bread and their extensive menu.	Had good vegetarian options as well.	Great place for quality meals.	I just love their food.	Love their food here.		Such a great selection of vegetarian & vegan options too!	Farmers has always been one of my favorite restaurants in the area!	I‚Äôve been a customer for 8 years now, good food for decent prices.	One of my top places for tasty quality meals.	One of my preferred places for tasty Quality Meals.	Quality food at a more than reasonable price.	One of my favorite locations for tasty Quality Meals.
I don't like American style cuisine. My budget isn't very high.	I prefer international cuisine. I prefer a cheaper place.	Good food for cheap.	I grew up on the east coast eating a lot of good Italian food both in restaurants and homemade by family.	Pasta and sauce really exceed my expectations for the Price!	Quality food at a more than reasonable price.	Great food at a reasonable price.	Superior restaurant, the only place I will have the dim sum.														It was by far my favorite Italian cuisine compared to the other three	Great food with traditional Italian favorites as well as some more inventive menu items.	Excellent service ambience & cuisine!!!	Great place for quality meals.	Greek food and the atmosphere here is quality.		A good authentic restaurant with decent inside decor.	Brazilian food and the atmosphere at this place is excellent.	One of my top places for tasty quality meals.	One of my preferred places for tasty Quality Meals.	But menu is just beautiful and food is great too.	My fav place for Brazilian food.	The price is amazing for the quality of food you get.
I'm not a very adventurous eater. Not a huge fan of Mexican cuisine.	I prefer familiar food. I prefer Italian food.	I grew up on the east coast eating a lot of good Italian food both in restaurants and homemade by family.	It was by far my favorite Italian cuisine compared to the other three	It was one of my favorite Italian dishes I‚Äôve ever tried.	It was by far my favorite Italian cuisine compared to the other three	I grew up on the east coast eating a lot of good Italian food both in restaurants and homemade by family.	Great food with traditional Italian favorites as well as some more inventive menu items.														My favorite dish is the Pappardelle Pasta with the tomato basil sauce.	Greek food and the atmosphere here is quality.	We've also dined here for lunch and thre chicken parmesan	Great, old style Italian food with excellent service from the front door all the way through dessert.	Good, delicious food that serves food with history and smiles.		The best Italian food I've had in Chicago, so far.	I really love the Greek salad here with lamb and beef meat.	Best Italian food!	It was one of my favorite Italian dishes I‚Äôve ever tried.	I always get the chicken flautas entree, garlic shrimp tacos and the cheese	Greek food, mmm, awesome.	Food is great but this place stands above the rest because of the homemade red salsa .
I've spent too much on food this month. American style food is very greasy.	I prefer a place with affordable prices. I prefer lighter food.	Food is so good and feels like I'm eating healthy even of	Good food for cheap.	a little pricey with some dishes better than others.	The price is amazing for the quality of food you get.	Quality food at a more than reasonable price.	Great food at a reasonable price.														The place serves large portions and for affordable prices.	Certainly a place worth stopping over, the food is awesome and fresh, the costs are reasonable and it is constantly neat here.	I‚Äôve been a customer for 8 years now, good food for decent prices.	A little more pricey than the typical dinner spot, but the location and service are worth it.	Good food in a relaxed atmosphere.		I go here whenever I want something Good, filling, and great price..	Very small place, but the food is great and the prices are affordable.	But it was plenty to satisfy a craving for grilled meats, and I would come back if the dinner prices were a little cheaper.	The food is delicious, the price is reasonable.	Great food at great prices.	Price is good, food is great	Great place for quality meals.
I don't feel like eating appetizers. Sushi is nasty.	I prefer to get straight to the main course. I prefer cooked food.	Both lobster bisque and steak were little salty for me but overall great food and nice that they were served hot!	It may have literally been the best sushi I have ever had.	The sushi was fair but not very special and the menu looked very standard.	In good weather, I particularly enjoy the outdoor dining.	I only eat Beef Brisket here because is delicious!	Food is absolutely delicious and there are so many choices!														Meals as well as bites from the starters to desert including bread are very good and creative!	Meat was well seasoned and well cooked.	Food is very nicely prepared and presented.	That plus a perfectly cooked steak makes this a great night out for any occasion.	Food was cooked well with fresh ingredients.		The food was excellent, I like my steak	Food is always great...lot of variety in veg and non	My favorite selections are the Steak Tartare and the Lamb Chops.	I always order tacos and rice.	Steaks were cooked perfect to our liking.	I always get the chicken flautas entree, garlic shrimp tacos and the cheese	But I‚Äôm not a BBQ aficionado
That's not a very filling food. I'm with my daughter's soccer team.	I prefer a more heavy food. I prefer a place with a kids' menu.	My daughter and I had the asada quesadilla and Chile verde fries.	Got some rice, bean and cheese burritos for the kids and they enjoyed them.	We ordered two family‚Äôs meals Togo- which were so delicious!	This is an affordable, kid-friendly place specialized in burgers and American food.	Food is good, open late and a drive thru !!	But menu is just beautiful and food is great too.														Great food but service can be better.	I always get the chicken flautas entree, garlic shrimp tacos and the cheese	Food, service and ambiance are great!	Food is delicious and portions are huge!	This is a 4 star, kid-friendly, vegetarian-friendly place that serves American food and desserts which also serves alcohol.		A fun place to eat give plenty of fries better than McDonald's all the food	Menu is simple but well done, they welcome substitutions and portion size changes.	Food portions were a good size and service was decent.	Superior restaurant, the only place I will have the dim sum.	I went for a lunch buffet and they had wide variety in the buffet menu.	4 stars only because I've had a way better, gourmet burger elsewhere for the price.	Great place for quality meals.
I've spent too much on food this month. I prefer chicken over red meat.	I prefer a place with affordable prices. I prefer chicken.	But it was plenty to satisfy a craving for grilled meats, and I would come back if the dinner prices were a little cheaper.	Turkey burger and fries, both very tasty!	Lamb and beef plate is great, I get that with hummus veggies and rice.	Quality food at a more than reasonable price.	For Indian food in the downtown area, I think this place has the best value.	Great food at a reasonable price.														I go here whenever I want something Good, filling, and great price..	One of my top places for tasty quality meals.	Great food at great prices.	The prices are high but appropriate; overall, I rate this restaurant as a good value for fine dining, perfect for a business dinner or special occasion.	Really nice restaurant if you want to eat some excellent meats.		Superior restaurant, the only place I will have the dim sum.	Great place for quality meals.	Price is good, food is great	Their steaks and lamb are also worth it.	The price is amazing for the quality of food you get.	But it was plenty to satisfy a craving for grilled meats, and I would come back if the dinner prices were a little cheaper.	Classic burgers at reasonable prices in the Watertower Place!
I see dirt spots all over. I've never had the stomach for vegan cuisine.	I prefer a cleaner place. I prefer meat and fish.	Well prepared and delicious Indian food (I ate vegetarian food).	I only eat Beef Brisket here because is delicious!	I'm vegan for health reasons.	but it is fine dining Very good restaurants for meat lovers, you can choose from all kinds of steaks.	Really nice restaurant if you want to eat some excellent meats.	delicious steaks and seafood...														Overall a great place for a date or a family dinner.	Food, service and ambiance are great!	Excellent clean environment extremely nice place to eat.	Burger, Halibut Bouillabaisse, and sushi are all fantastic Very good breakfast food and service.	My preferred location for delicious Burgers.		My favorite selections are the Steak Tartare and the Lamb Chops.	The food was excellent, I like my steak	One of my preferred places for tasty Quality Meals.	Great place for quality meals.	I only eat Beef Brisket here because is delicious!	In good weather, I particularly enjoy the outdoor dining.	One of my top places for tasty quality meals.
The sandwich is overstuffed. Burgers and fries are too heavy.	I prefer more normal sandwiches. I prefer a light meal.	Every burger is made fresh to order.	Fries make every sandwich and wrap taste 100x better!	Cheeseburgers were good, fries were wimpy.	Fries make every sandwich and wrap taste 100x better!	The pitas that come with the meals are warm and soft.	Spicy chix sandwich is the best.														I love the food best gyro, kitchen rotisserie is my best and with a spinach salad on the side yummyy :)	The fries are the best I have ever had.	Although it was the least favorite dish of the night, I still liked it with the small pieces of bacon.	Servings are on the small side but very good.	Lamb and beef plate is great, I get that with hummus veggies and rice.		You can either choose a pita, a bowl, or a salad with your choice of protein, as well as toppings.	lamb gyro all the way.	All the sides are delicious and large enough to share.	I always get the chicken flautas entree, garlic shrimp tacos and the cheese	I always order tacos and rice.	First and foremost, my and girlfriend LOVE chicken sandwiches, and Dave's is by far one of thee	Turkey burger and fries, both very tasty!
I see dirt spots all over. I'm trying to lose weight.	I prefer a cleaner place. I prefer lighter food.	Food is so good and feels like I'm eating healthy even of	Stopped by for lunch while walking the Mile.	Definitely found a good spot for a Mexican food fix.	In good weather, I particularly enjoy the outdoor dining.	Food, service and ambiance are great!	it's perfect for lunch, and its super clean and has great food.														One of my top places for tasty quality meals.	a little pricey with some dishes better than others.	I just love their food.	Superior restaurant, the only place I will have the dim sum.	quality meals and the setting at this place is excellent.		Everything in the buffet is always high quality, has great flavor and a good amount of heat.	Great place for quality meals.	One of my preferred places for tasty Quality Meals.	Food is great but this place stands above the rest because of the homemade red salsa .	I always order tacos and rice.	Quality Meals and the scene at this spot is excellent.	My top spot for tasty quality meals.
Didn't seem kid-friendly. I ate a lot yesterday so I'd like to eat lighter today.	I prefer a family-friendly place. I prefer a more light restaurant.	Got some rice, bean and cheese burritos for the kids and they enjoyed them.	I was to full to have dessert!	Took my daughter for a birthday lunch.	Superior restaurant, the only place I will have the dim sum.	Overall a great place for a date or a family dinner.	Food, service and ambiance are great!														Great place to go to for a great meal.	This is an affordable, kid-friendly place specialized in burgers and American food.	One of my preferred places for tasty Quality Meals.	A great place for a meal or just cocktails and a view.	It's a good place to eat, has a drive thru		A great place for happy hour and lunch.	This is a 4 star, kid-friendly, vegetarian-friendly place that serves American food and desserts which also serves alcohol.	This is a 4 star, kid-friendly, vegetarian-friendly place that serves Italian food and pizza which also serves alcohol.	This is a 4 star, casual, kid-friendly place for Brazilian food and steaks with good parking options which also serves alcohol.	This is a 4 star, kid-friendly place for American food, seafood and steaks which also serves alcohol.	Great place for quality meals.	OUTSIDE OF THIS SMALL PLACE IS A GOOD AREA TO EAT....
Trendy places are overrated. I ate a lot yesterday so I'd like to eat lighter today.	I prefer classic places. I prefer a more light restaurant.	Good food in a relaxed atmosphere.	OUTSIDE OF THIS SMALL PLACE IS A GOOD AREA TO EAT....	Fast, cheap, late night food!	Superior restaurant, the only place I will have the dim sum.	Food, service and ambiance are great!	Great place to go to for a great meal.														Great place for quality meals.	Wonderful chain steak house with consistent quality of food and service.	Great, old style Italian food with excellent service from the front door all the way through dessert.	Great food but service can be better.	One of my favorite locations for tasty Quality Meals.		Very good upscale restaurant.	This place has a good vibe and a decent menu.	A great place for happy hour and lunch.	menu is like a cafe in boston i loved.	Overall a great place for a date or a family dinner.	One of the best restaurant in the city.	quality meals and the setting at this place is excellent.
Food trucks are usually too greasy. The table is not even clean.	I prefer a more formal restaurant. I prefer a clean table.	The Grill has solid food.	dinning is clean this happened during lunch 9/22 Great cheese burger, and cheese fries were amazing.	Everything in the buffet is always high quality, has great flavor and a good amount of heat.	Superior restaurant, the only place I will have the dim sum.	On making the reservation I just asked for a nice table to mark the occasion.	The restaurant has a great view and both choices of food were simply delicious and sophisticated.														Very comfortable dining experience.	It was a classy restaurant with great food varieties.	Food is well prepared, staff is friendly and tables and area is well cleaned and kept.	Great decor, helpful staff, and a variety of modern American and European food options.	Friendly staff and clean restaurant.		The rest of my table also enjoyed their meals.	Top notch fine dining at its best!	In good weather, I particularly enjoy the outdoor dining.	The Signature Room is hands down my favorite restaurant and will forever hold a special place in my heart.	In recent memory, I can truly say I have not had a better dining experience.	elegant, upscale and classy place for a special occasion.	The prices are high but appropriate; overall, I rate this restaurant as a good value for fine dining, perfect for a business dinner or special occasion.
That's not a very filling food. I prefer chicken over red meat.	I prefer a more heavy food. I prefer chicken.	Dim sum is excellent, main course - chicken - was not as spicey as I thought.	Chicken flautas are always delish.	Pork ribs didn't have much meat.	Chicken flautas are always delish.	Turkey burger and fries, both very tasty!	I order medium well.														Chicken Picatta was basic, but flavorful.	Cheeseburgers were good, fries were wimpy.	I love the food best gyro, kitchen rotisserie is my best and with a spinach salad on the side yummyy :)	The food was excellent, I like my steak	Dim sum is excellent, main course - chicken - was not as spicey as I thought.		I always get the chicken flautas entree, garlic shrimp tacos and the cheese	Lamb and beef plate is great, I get that with hummus veggies and rice.	Good food for being fast food	I always order tacos and rice.	Very greasy chicken but burgers were excellent!!!	lamb gyro all the way.	The chicken, on the other hand was delicious and juicy - the sirloin was great too!
I don't want lamb. I've spent too much on food this month.	I prefer beef. I prefer a place with affordable prices.	But it was plenty to satisfy a craving for grilled meats, and I would come back if the dinner prices were a little cheaper.	Chicken, lamb, pork and so many cuts of beef that you will easily find the one you love.	Yes a good steak is expensive!	I only eat Beef Brisket here because is delicious!	However nothing out here compares to the meats you get in Texas - some of the meats served	Their steaks and lamb are also worth it.														Great food at a reasonable price.	Really nice restaurant if you want to eat some excellent meats.	Good place, good burgers.	Wow, a wonderful upscale place with exceptional quality meats, great atmosphere and service	The price is amazing for the quality of food you get.		but it is fine dining Very good restaurants for meat lovers, you can choose from all kinds of steaks.	Yes a good steak is expensive!	Classic burgers at reasonable prices in the Watertower Place!	Quality food at a more than reasonable price.	But it was plenty to satisfy a craving for grilled meats, and I would come back if the dinner prices were a little cheaper.	Might seem pricey, but the portions are great and the steaks are mouthwatering.	Delicious sirloin and great selection of sides.
I'm too tired and hungry to wait. The sandwich is overstuffed.	I prefer a place with faster service. I prefer more normal sandwiches.	Had to avocado toast.	I was to full to have dessert!	I finished half of it for lunch and then have for dinner.	Great food but service can be better.	I love their bread and their extensive menu.	They serve fast which is very good.														4 stars only because I've had a way better, gourmet burger elsewhere for the price.	Superior restaurant, the only place I will have the dim sum.	THE DRIVE THROUGH IS QUICK AND THE EATING	The food here is very good like how you can get whatever toppings you want on your gyro without an extra charge.	Their quesadillas are amazing and the service is rather fast!		My chicken sandwich and fries were both hot and yummy Great food and friendly staff!	Food is good, open late and a drive thru !!	First and foremost, my and girlfriend LOVE chicken sandwiches, and Dave's is by far one of thee	Good burgers, fries, and service.	Good food but slow service Delicious burgers as usual and the service was super quick!	Great food and fast service.	Good food with fast drive through service!
I'd rather not eat Bambi. Today I'm celebrating.	I prefer seafood. I prefer a more festive place.	Steak was delicious.	We had a wonderful Thanksgiving feast!	I could have eaten it all night.	delicious steaks and seafood...	In good weather, I particularly enjoy the outdoor dining.	The food in this place is delicious üòã and the lemon pie is my favorite.														I love the food here.	Tonight we choose to have an appetizer of the dungeness crab cakes.	I liked my red velvet martini, and the calamari.	The place offers a fantastic variety of delicious food.	The food is delicious as well as the cocktails!		Burger, Halibut Bouillabaisse, and sushi are all fantastic Very good breakfast food and service.	For dinner, I enjoyed the scallops one night and the sea bass the second.	Everything delicious with an exception of the shrimps.	Both lobster bisque and steak were little salty for me but overall great food and nice that they were served hot!	We started with appetizers, our choice was crab legs, oysters, shrimp, smoked salmon and Blue cheese.	Overall a great place for a date or a family dinner.	Always worth the dining experience, just to look out at the city and the lake!!!
That's not a very filling food. Their dishes look over-seasoned.	I prefer a more heavy food. I prefer food that is more natural.	a little pricey with some dishes better than others.	Nice dinner setting, with huge portions.	Fantastic perfectly executed high end Chinese food.	Food is so good and feels like I'm eating healthy even of	Food is always great...lot of variety in veg and non	Food is absolutely delicious and there are so many choices!														Quality Meals, mmm, my favorite treat.	Good food, good taste, fast.	I'm vegan for health reasons.	Food is soo delicious.	M burger is better value and a finer burger.		The foods are delicious and with the calories on the menu you can eat whatever match to your diet.	Food is delicious and portions are huge!	You can either choose a pita, a bowl, or a salad with your choice of protein, as well as toppings.	Lamb and beef plate is great, I get that with hummus veggies and rice.	Good food for being fast food	I always order tacos and rice.	Food is delicious and dessert is a bonus!
That's somewhat unimaginative. Burgers and fries are too heavy.	I prefer a more creative place. I prefer a light meal.	The Fries were nice because they were standard and had no unique flavor, but decent fries!	Good price on the burgers, sodas are a bit too much.	Good lettuce wraps Burgers could have been bigger Love the ice cream	Great place for quality meals.	Overall a great place for a date or a family dinner.	great place for a quick meal.														Good food in a relaxed atmosphere.	One of my favorite locations for tasty Quality Meals.	Quality Meals and the scene at this spot is excellent.	My top spot for tasty quality meals.	Food, service and ambiance are great!		Superior restaurant, the only place I will have the dim sum.	One of my preferred places for tasty Quality Meals.	A great place for happy hour and lunch.	quality meals and the setting at this place is excellent.	One of my top places for tasty quality meals.	A great place for a meal or just cocktails and a view.	Great place to go to for a great meal.
We're taking granpa and grandma to lunch. I've never had the stomach for vegan cuisine.	I prefer a place that's good for seniors. I prefer meat and fish.	Well prepared and delicious Indian food (I ate vegetarian food).	Everything was delicious, though I was disappointed in the veal, tough and would have been better over pasta.	we‚Äôve had some warm bread with butter, young roasted chicken with beans, smoked octopus with hummus and a very soft baked chicken breast,with some pickled onions and mushrooms.	Farmers has always been one of my favorite restaurants in the area!	but it is fine dining Very good restaurants for meat lovers, you can choose from all kinds of steaks.	Overall a great place for a date or a family dinner.														Great place for quality meals.	Food is good, lots of choices at the salad bar.	The buffet is excellent with a good combination of meat/vegetarian dishes as well as spicy/non-spicy options.	Bit they have outdoor seating and its comfortable Great place for dinner.	Their steaks and lamb are also worth it.		Really nice restaurant if you want to eat some excellent meats.	Food, service and ambiance are great!	Excellent steak, cocktail, bread, sides, service, with a great atmosphere.	In good weather, I particularly enjoy the outdoor dining.	The food was excellent, I like my steak	Delicious filet mignon and friendly service, great for date night.	The steaks are excellent and the wine list is quite good.
I'm too tired and hungry to wait. Food trucks are usually too greasy.	I prefer a place with faster service. I prefer a more formal restaurant.	Food is good, open late and a drive thru !!	Good food with fast drive through service!	THE DRIVE THROUGH IS QUICK AND THE EATING	Superior restaurant, the only place I will have the dim sum.	Great food but service can be better.	Food, service and ambiance are great!														It's plenty of restaurants around the Water Tower Place that will gladly take my money, with a smile and good customer service M Burger	It's a good place to eat, has a drive thru	The food is always fresh and flavorful, cashiers provides excellent service.	It's still a nice restaurant with good food and helpful staff.	Fantastic ambience, food and service.		Superior service, excellent food and drinks.	Delicious food, great service every time and the decor and atmosphere of the restaurant is so charming and warm.	The prices are high but appropriate; overall, I rate this restaurant as a good value for fine dining, perfect for a business dinner or special occasion.	Very good upscale restaurant.	Food is good, open late and a drive thru !!	My first time there the service was good very polite and the food was really good	The service and food are excellent, highly recommended Best food best service
Most of the time I don't eat any fish or meat. I don't like fettuccini.	I prefer a vegetarian place. I prefer ravioli, spaghetti or penne.	My favorite dish is the Pappardelle Pasta with the tomato basil sauce.	Everything delicious with an exception of the shrimps.	I always get the chicken flautas entree, garlic shrimp tacos and the cheese	My favorite dish is the Pappardelle Pasta with the tomato basil sauce.	I recommend spaghetti with meatballs, it was delicious and the meatballs were unique, big and good.	I really love the Greek salad here with lamb and beef meat.
I gave up sugar last year. The food is usually cold there.	I prefer a place that doesn't serve dessert. I prefer steaming hot food.	The burgers have definitely improved, and so have the chocolate shakes.	Good food, a little cold outside but the heaters helped.	Food is so good and feels like I'm eating healthy even of	Everything in the buffet is always high quality, has great flavor and a good amount of heat.	I love going here and getting take out or just a delicious slice of cheese cake.	Superior restaurant, the only place I will have the dim sum.
I'm willing to splurge. I prefer kid-friendly.	I prefer a more expensive place. I prefer a more kid-friendly place.	I comes with a particular price tag ...	A nice place to splurge on.	($17)	Overall a great place for a date or a family dinner.	It's a nice place to go during the day with your children.	This is an affordable, kid-friendly place specialized in burgers and American food.
It seems too fancy. I never really dine at restaurant chains.	I prefer a more casual place. I prefer a more unique place.	In recent memory, I can truly say I have not had a better dining experience.	I guess I didn't really go into the restaurant a few years ago, just the bar area for happy hour.	I went for a lunch buffet and they had wide variety in the buffet menu.	And secondly the Lounge, where you can just a get a drink and enjoy the view.	üòãüòã Good cozy place with decent food and drinks	Overall a great place for a date or a family dinner.
That's horrible looking pizza. I'm not a fan of high-end places.	I prefer a better looking pizza. I prefer a more casual place.	I am picky when it comes to pizza, but this place rocked.	This is one of the best deep dish pizzas I have ever eaten.	I have not tasted a better pizza anywhere else, And even though we had to wait outside, it was well worth the wait!	I have not tasted a better pizza anywhere else, And even though we had to wait outside, it was well worth the wait!	I am picky when it comes to pizza, but this place rocked.	Pleasant atmosphere and best deep dish pizza
It has a freaking band. I don't like spending much money.	I prefer a more quiet place. I prefer a cheap place.	It‚Äôs a little pricey but who cares!	I comes with a particular price tag ...	Pricey but better than other options.	Great place to relax and have a bite to eat and get away from the loudness of the city.	üòãüòã Good cozy place with decent food and drinks	And secondly the Lounge, where you can just a get a drink and enjoy the view.
I don't have the time to hang around. Fast food is pretty bad for you.	I prefer a place that I can get in and out quickly. I prefer more nutritious food.	But I eat here once and a while staring my commute home.	Food is good, open late and a drive thru !!	Food is so good and feels like I'm eating healthy even of	Great place for quality meals.	Food is good, open late and a drive thru !!	It's a good place to eat, has a drive thru
It's a little too spicy for me. Shellfish makes me itch.	I prefer a milder food. I prefer a more allergy-friendly place.	Everything delicious with an exception of the shrimps.	Fish tacos are so good, sauce is very hot	Some bites were good, the sauce had a nice flavor, but the ribs overall were far too dry.	Superior restaurant, the only place I will have the dim sum.	Good food in a relaxed atmosphere.	Everything in the buffet is always high quality, has great flavor and a good amount of heat.
I don't like curry. I'm not a wine person.	I prefer Italian or Chinese. I prefer a good beer.	But I‚Äôm not a BBQ aficionado	Food is good and wine is OK.	I love love love Indian food and have tested plenty of restaurants.	Indians just one suggestion have a very mild beer, their strong beers tend to be very bitter, u might not enjoy them	I started with the Moscow Mule - sobieski vodka, angostura bitters, ginger beer.	Excellent drinks , just okay food.
I don't like burgers. This place looks chaotic.	I prefer a more fancy place. I prefer a more organized place.	I just love this place, its menu and its owners.	I like this place it has drive-thru.	I like this restaurant very much.	elegant, upscale and classy place for a special occasion.	And secondly the Lounge, where you can just a get a drink and enjoy the view.	A great place for a meal or just cocktails and a view.
I am not fussed about how the ingredients are grown. I'm not a fan of salmon.	I prefer something plainer or simpler. I prefer a different kind of fish.	I ordered the salmon which was okay, it was cooked well	My fiance had the maple seared salmon and it also was decadent.	All were excellent, but the salmon was really something special: perfectly cooked so that it was still tender and moist, topped with crab and bernaise, on a bed of mashed celeriac.	For dinner, I enjoyed the scallops one night and the sea bass the second.	Everything delicious with an exception of the shrimps.	I liked my red velvet martini, and the calamari.
I'm not a fine dining type of person. I don't really like seafood.	I prefer a more casual place. I prefer beef or chicken.	Both lobster bisque and steak were little salty for me but overall great food and nice that they were served hot!	Everything delicious with an exception of the shrimps.	I selected the pasta option minus the seafood.	but it is fine dining Very good restaurants for meat lovers, you can choose from all kinds of steaks.	My preferred location for delicious Burgers.	Overall a great place for a date or a family dinner.
That steak is raw. I'm not big on ethnic food.	I prefer my steak well done. I prefer food with more familiar flavors.	I only eat Beef Brisket here because is delicious!	However nothing out here compares to the meats you get in Texas - some of the meats served	Steak was seasoned just the way I like it and a perfect medium rare to rare like requested.	Steak was seasoned just the way I like it and a perfect medium rare to rare like requested.	I only eat Beef Brisket here because is delicious!	The food was excellent, I like my steak
The weather is too cold for that. I eat like a bird.	I prefer a warmer place. I prefer smaller portions.	In good weather, I particularly enjoy the outdoor dining.	But I‚Äôm not a BBQ aficionado	Food is so good and feels like I'm eating healthy even of	Smaller portions, but very tasty	In good weather, I particularly enjoy the outdoor dining.	Everything in the buffet is always high quality, has great flavor and a good amount of heat.
Most fancy restaurants are overrated. I'm not in the mood for carbs.	I prefer cheaper places. I prefer a more protein-based meal.	Food is great but this place stands above the rest because of the homemade red salsa .	Food is absolutely delicious and there are so many choices!	The foods are delicious and with the calories on the menu you can eat whatever match to your diet.	Quality food at a more than reasonable price.	The price is amazing for the quality of food you get.	Superior restaurant, the only place I will have the dim sum.
I haven't had red meat in 30 years. Mexican food doesn't excite me.	I prefer chicken. I prefer Italian or Asian food.	There was the best Brazilian BBQ which I‚Äôve ever had.	I have had the burritos here years ago and couldn't remember if I liked them or not, so I decided to try tacos this time.	I love the chicken tacos!	Chinese food here - super tasty.	I always get the chicken flautas entree, garlic shrimp tacos and the cheese	My favorite dish is the Pappardelle Pasta with the tomato basil sauce.
I'm trying to eat more tofu instead. This place looks chaotic.	I prefer vegetarian cuisine. I prefer a more organized place.	Well prepared and delicious Indian food (I ate vegetarian food).	Crispy tofu was delicious and perfectly lightly fried.	The food here is delicious!	but it is fine dining Very good restaurants for meat lovers, you can choose from all kinds of steaks.	Large selection of vegetarian and non-vegetarian meals.	Such a great selection of vegetarian & vegan options too!
I'm avoiding fancy places. Their menu is somewhat limited.	I prefer a more relaxed place. I prefer a more extensive menu.	Superior restaurant, the only place I will have the dim sum.	The menu does not offer a lot of things and mostly offers steaks and chicken courses.	I love their bread and their extensive menu.	But menu is just beautiful and food is great too.	Food, service and ambiance are great!	quality meals and the setting at this place is excellent.
I'm not into French food. I don't eat meat or fish.	I prefer Italian, Thai or Japanese food. I prefer a vegetarian restaurant.	I'm vegan for health reasons.	But I‚Äôm not a BBQ aficionado	I grew up on the east coast eating a lot of good Italian food both in restaurants and homemade by family.	Chinese food here - super tasty.	I love love love Indian food and have tested plenty of restaurants.	It was by far my favorite Italian cuisine compared to the other three
I prefer more vegetarian options. I won't eat it if it's too hot.	I prefer that the menu has more options for vegetarians. I prefer milder food.	I only eat Beef Brisket here because is delicious!	Lamb and beef plate is great, I get that with hummus veggies and rice.	Although it was the least favorite dish of the night, I still liked it with the small pieces of bacon.	Such a great selection of vegetarian & vegan options too!	but it is fine dining Very good restaurants for meat lovers, you can choose from all kinds of steaks.	Large selection of vegetarian and non-vegetarian meals.
That's too upscale for me. I'm not eating Bambi.	I prefer a more casual place. I prefer vegetarian cuisine.	But I‚Äôm not a BBQ aficionado	Very upscale, but tasty in a way that you'll appreciate.	Everything was delicious, though I was disappointed in the veal, tough and would have been better over pasta.	but it is fine dining Very good restaurants for meat lovers, you can choose from all kinds of steaks.	Really nice restaurant if you want to eat some excellent meats.	One of my preferred places for tasty Quality Meals.
I don't like a quiet meal. I don't like many cuisines.	I prefer a louder place. I prefer a specific cuisine (French, Italian, American, etc).	The place is extremely crowded and noisy - not a place for a romantic dinner :))	In good weather, I particularly enjoy the outdoor dining.	All of the food was good and cooked exactly as I wanted.	Italian food Good portion, great music and a good place to go for a romantic date Always a great italian classic!	Good food in a relaxed atmosphere.	Great place to relax and have a bite to eat and get away from the loudness of the city.
Not a huge fan of Mexican cuisine. The weather is too cold for that.	I prefer Italian, French or American food. I prefer a warmer place.	There was the best Brazilian BBQ which I‚Äôve ever had.	Always amazing, high quality and real Mexican cuisine.	Food is great but this place stands above the rest because of the homemade red salsa .	I grew up on the east coast eating a lot of good Italian food both in restaurants and homemade by family.	It was by far my favorite Italian cuisine compared to the other three	Great food with traditional Italian favorites as well as some more inventive menu items.
It has a freaking band. Booth seating would be more comfortable.	I prefer a more quiet place. I prefer bench seating.	It has a lovely outdoor seating.	Their outdoor seating is informal and good for young folks.	Outdoor seating available.	And secondly the Lounge, where you can just a get a drink and enjoy the view.	This place has a lovely outdoor seating.	It's a lovely place with outdoor seating.
I have a bigger budget than that. It looks like a loud setting.	I prefer more expensive cuisine. I prefer a more intimate setting.	Spendy and could be a more relaxed atmosphere.	Pricey but better than other options.	I think, at the weekend this place will be crowded and too noisy.	But it was plenty to satisfy a craving for grilled meats, and I would come back if the dinner prices were a little cheaper.	Food is absolutely delicious and there are so many choices!	I go to fabulous restaurants on a regular basis, Michelin stars, Top Chef, etc, so food wise, excellent of course.
Food trucks are underwhelming. Shellfish makes me itch.	I prefer sit-down restaurants. I prefer a more allergy-friendly place.	Calamari were surprisingly good for a pizza place.	The scallops are terrific.	Everything delicious with an exception of the shrimps.	Superior restaurant, the only place I will have the dim sum.	Food, service and ambiance are great!	Great food but service can be better.
I'm saving up for a car. I hate gastropubs.	I prefer a place that is more affordable. I prefer a more classy place.	I ordered a side car, and it was perfect.	I like the front window or the roof top, service is just nice and clean.	Valet parking or metered street parking, credit accepted, reservation recommended.	elegant, upscale and classy place for a special occasion.	A great place for a meal or just cocktails and a view.	And secondly the Lounge, where you can just a get a drink and enjoy the view.
I'm not into eating fast food. I'm not a fan of American style cuisine.	I prefer a more upscale place. I prefer Mediterranean cuisine, Asian cuisine, Mexican cuisine or Italian cuisine.	Good food for being fast food	4 stars only because I've had a way better, gourmet burger elsewhere for the price.	Food is good, open late and a drive thru !!	Always amazing, high quality and real Mexican cuisine.	It was by far my favorite Italian cuisine compared to the other three	Food is great but this place stands above the rest because of the homemade red salsa .
I don't like fettuccini. I hate when it's too loud.	I prefer ravioli, spaghetti or penne. I prefer a quieter place	My favorite dish is the Pappardelle Pasta with the tomato basil sauce.	The Lasagna is just amazing and is the food I order the most.	Quesadillas are the best!!!	My favorite dish is the Pappardelle Pasta with the tomato basil sauce.	I recommend spaghetti with meatballs, it was delicious and the meatballs were unique, big and good.	The Lasagna is just amazing and is the food I order the most.
My mother had to bribe me to eat vegetables as a kid. Raw food is bad for my stomach.	I prefer meat. I prefer cooked food.	I'm vegan for health reasons.	I found that I do not enjoy tuna, but my mom thought it was excellent.	Lamb and beef plate is great, I get that with hummus veggies and rice.	I only eat Beef Brisket here because is delicious!	Meat was well seasoned and well cooked.	Steaks were cooked perfect to our liking.
I gave up meat. They don't seem to serve alcohol.	I prefer vegan food. I prefer a place that serves alcohol.	Pork ribs didn't have much meat.	The menu does not offer a lot of things and mostly offers steaks and chicken courses.	Everything was delicious, though I was disappointed in the veal, tough and would have been better over pasta.	Such a great selection of vegetarian & vegan options too!	Excellent drinks , just okay food.	Had good vegetarian options as well.
It looks too fancy. I like to stay under $20 a meal.	I prefer a more casual place. I prefer a more affordable place.	The price is amazing for the quality of food you get.	a little pricey with some dishes better than others.	The food is delicious, the price is reasonable.	Overall a great place for a date or a family dinner.	üòãüòã Good cozy place with decent food and drinks	A great place for a meal or just cocktails and a view.
I'm not willing to deal with rude staff. Not enough vegetarian options.	I prefer to go to a more friendly place. I prefer more vegetarian options.	The menu does not offer a lot of things and mostly offers steaks and chicken courses.	For instance, they could use a few more vegetarian options.	Large selection of vegetarian and non-vegetarian meals.	but it is fine dining Very good restaurants for meat lovers, you can choose from all kinds of steaks.	Such a great selection of vegetarian & vegan options too!	OUTSIDE OF THIS SMALL PLACE IS A GOOD AREA TO EAT....
I'm not willing to deal with rude staff. I hate gastropubs.	I prefer to go to a more friendly place. I prefer a more classy place.	First of all, staff is very pleasant and courteous.	Friendly and accommodating staff.	Attentive, polite and friendly staff.	And secondly the Lounge, where you can just a get a drink and enjoy the view.	elegant, upscale and classy place for a special occasion.	A great place for a meal or just cocktails and a view.
I'm not into eating fast food. Crowded places make me anxious.	I prefer a more upscale place. I prefer a more relaxed place.	But I eat here once and a while staring my commute home.	Food is so good and feels like I'm eating healthy even of	Food is good, open late and a drive thru !!	A great place for a meal or just cocktails and a view.	Food, service and ambiance are great!	Superior restaurant, the only place I will have the dim sum.
I don't like buffets. I'm craving some sushi.	I prefer a place where I can order specific dishes. I prefer Japanese cuisine.	But the main entree, the sushi rolls, were so good.	I will definitely come back there, to try some sushi and desserts.	Loved the wonton soup and duck salad Terrific upscale Chinese, get the soup dumplings or you've failed.	Superior restaurant, the only place I will have the dim sum.	A good authentic restaurant with decent inside decor.	I highly recommend Shanghai Terrace over TAO or any hi end Chinese restaurant in the city.
Too expensive. I'm not a fan of salads.	I prefer a more affordable place. I prefer a place with more appetizing food.	Pasta and sauce really exceed my expectations for the Price!	a little pricey with some dishes better than others.	But it was plenty to satisfy a craving for grilled meats, and I would come back if the dinner prices were a little cheaper.	Great place for quality meals.	Quality food at a more than reasonable price.	Great food at a reasonable price.
I can't eat animals. When I have experimental cuisine food choices are very limited.	I prefer vegetarian food. I prefer a more varied menu.	Food is always great...lot of variety in veg and non	I'm vegan for health reasons.	Food is absolutely delicious and there are so many choices!	I'm vegan for health reasons.	Large selection of vegetarian and non-vegetarian meals.	Such a great selection of vegetarian & vegan options too!
Garlic gives me terrible stomach cramps. I'm not a fan of Korean food.	I prefer a place that doesn't use garlic. I prefer sushi or Italian.	Chinese food here - super tasty.	Lamb and beef plate is great, I get that with hummus veggies and rice.	Everything delicious with an exception of the shrimps.	My favorite dish is the Pappardelle Pasta with the tomato basil sauce.	It was by far my favorite Italian cuisine compared to the other three	I always get the chicken flautas entree, garlic shrimp tacos and the cheese
I'm not in the mood for carbs. I won't eat it if it's too hot.	I prefer a more protein-based meal. I prefer milder food.	The balsamic dressing weighed the salad down and I found myself feeling full quickly.	You can either choose a pita, a bowl, or a salad with your choice of protein, as well as toppings.	Lamb and beef plate is great, I get that with hummus veggies and rice.	Food is absolutely delicious and there are so many choices!	Food is always great...lot of variety in veg and non	I always get the chicken flautas entree, garlic shrimp tacos and the cheese
I hate gastropubs. It seems too loud for me.	I prefer a more classy place. I prefer a more quiet place to eat.	I think, at the weekend this place will be crowded and too noisy.	It can seem a bit stuffy when you are young but when you're an old timer like me just wanting to get away from the kids for a night, you appreciate the dimly lit rooms, quiet music, and non crowds.	The ambiance is wonderful.	Food, service and ambiance are great!	Superior restaurant, the only place I will have the dim sum.	Overall a great place for a date or a family dinner.
I don't eat fast food. I have been trying to eat healthier.	I prefer a more healthy place. I prefer a place that serves organic and/or local products.	Good food for being fast food	Food is so good and feels like I'm eating healthy even of	I'm vegan for health reasons.	I go here whenever I want something Good, filling, and great price..	Such a great selection of vegetarian & vegan options too!	Great place for quality meals.
I don't think the kids would enjoy. I prefer more vegetarian options.	I prefer a place where my kids would enjoy. I prefer that the menu has more options for vegetarians.	For instance, they could use a few more vegetarian options.	Everything was delicious, though I was disappointed in the veal, tough and would have been better over pasta.	I'm vegan for health reasons.	They have vegan options, fresh produce, an interesting, ever-changing menu selection, and the most fabulous Mac and Cheese.	Such a great selection of vegetarian & vegan options too!	Great place for quality meals.
I'm not a fan of American style cuisine. I'm not that much in a hurry.	I prefer Mediterranean cuisine, Asian cuisine, Mexican cuisine or Italian cuisine. I prefer to have a more relaxed meal.	I grew up on the east coast eating a lot of good Italian food both in restaurants and homemade by family.	But I‚Äôm not a BBQ aficionado	As a local, I can't wait to come back and try other things on the menu!	I grew up on the east coast eating a lot of good Italian food both in restaurants and homemade by family.	It was by far my favorite Italian cuisine compared to the other three	I always get the chicken flautas entree, garlic shrimp tacos and the cheese
I prefer hot sauce on the side. I don't like curry.	I prefer my food without hot sauce. I prefer Italian or Chinese.	My favorite dish is the Pappardelle Pasta with the tomato basil sauce.	Spicy chix sandwich is the best.	I only eat Beef Brisket here because is delicious!	My favorite dish is the Pappardelle Pasta with the tomato basil sauce.	I always get the chicken flautas entree, garlic shrimp tacos and the cheese	Great option of sauces always does it for me.
I'm with a non-vegan friend. I am pretty picky about what Asian foods I eat.	I prefer a place that has vegan options. I prefer Italian, French, Spanish foods.	I'm vegan for health reasons.	Well prepared and delicious Indian food (I ate vegetarian food).	Vegan friendly as we are on a newly recent vegan transition.	Such a great selection of vegetarian & vegan options too!	They have vegan options, fresh produce, an interesting, ever-changing menu selection, and the most fabulous Mac and Cheese.	Great food with traditional Italian favorites as well as some more inventive menu items.
Beans make me fart. Garlic gives me terrible stomach cramps.	I prefer meat-based dishes. I prefer a place that doesn't use garlic.	Food is so good and feels like I'm eating healthy even of	veggie burrito had refried beans, which my hubby said was good too.	Lamb and beef plate is great, I get that with hummus veggies and rice.	My favorite dish is the Pappardelle Pasta with the tomato basil sauce.	I love the food best gyro, kitchen rotisserie is my best and with a spinach salad on the side yummyy :)	I've had at other high class restaurants, but the chimichurri and sun dried tomato puree that accompanied
I'm not into eating fast food. I am not fussed about how the ingredients are grown.	I prefer a more upscale place. I prefer something plainer or simpler.	Good food for being fast food	I'm vegan for health reasons.	But I eat here once and a while staring my commute home.	Superior restaurant, the only place I will have the dim sum.	But menu is just beautiful and food is great too.	Very upscale, but tasty in a way that you'll appreciate.
I hate when it's too loud. Booth seating would be more comfortable.	I prefer a quieter place I prefer bench seating.	After 10ish more open seating.	I think, at the weekend this place will be crowded and too noisy.	They put a shade over there seating area which is nice	After 10ish more open seating.	This place has a lovely outdoor seating.	It's a lovely place with outdoor seating.
I'm on a tight budget. The heat in Tex-Mex is too much for me.	I prefer a place that's more affordable. I prefer a cooler place.	One of the only taqueria's in San Jose that I love good tortillas!	The carnitas was delicious and the burrito was a good size for the price.	Good taqueria with legit hot salsa with flavor.	üòãüòã Good cozy place with decent food and drinks	And secondly the Lounge, where you can just a get a drink and enjoy the view.	Very small place, but the food is great and the prices are affordable.
I always feel good about plant based. I'm not a wine person.	I prefer plant based cuisine. I prefer a good beer.	wonderful wine with the generous poor..	Love me a great Malbec and ribeye and this hit the spot!	The wine list is extensive with a great selection of both new and old world varietals.	I only eat Beef Brisket here because is delicious!	Fantastic steaks and wine.	Good burgers and beer.
It doesn't have a view. Organic foods are boring.	I prefer a good view. I prefer a non-organic place.	Food is always great...lot of variety in veg and non	The menu does not offer a lot of things and mostly offers steaks and chicken courses.	I guess I didn't expect it to be very good because it has a great view already, so the food mustn't be good.	In good weather, I particularly enjoy the outdoor dining.	View is the best in the city.	This place has a lovely outdoor seating.
I am no match for spicy food. I'm not a fan of salmon.	I prefer mild food. I prefer a different kind of fish.	Everything delicious with an exception of the shrimps.	Fish tacos are so good, sauce is very hot	Both lobster bisque and steak were little salty for me but overall great food and nice that they were served hot!	Everything delicious with an exception of the shrimps.	Sushi quality is high and real, fresh fish.	Both lobster bisque and steak were little salty for me but overall great food and nice that they were served hot!
I can't eat animals. Not kid-friendly.	I prefer vegetarian food. I prefer a kid-friendly place.	I'm vegan for health reasons.	But I‚Äôm not a BBQ aficionado	All you can eat, all delicious.	This is an affordable, kid-friendly place specialized in burgers and American food.	Great place for quality meals.	I just love their food.
This restaurant is too busy for me. I'd like to make a better impression on my date.	I prefer a quieter place. I prefer a place that is fancier.	I like to go with friends to this restaurant with my highest recommendations.	I had a fantastic time in this restaurant.	Couldn't ask for more from a restaurant!	In good weather, I particularly enjoy the outdoor dining.	Great place to relax and have a bite to eat and get away from the loudness of the city.	üòãüòã Good cozy place with decent food and drinks
I'm not in the mood for Japanese food. It's a little too spicy for me.	I prefer Italian food. I prefer a milder food.	Chinese food here - super tasty.	Relative to Chinese food, it's fantastic.	The sushi was fair but not very special and the menu looked very standard.	It was by far my favorite Italian cuisine compared to the other three	I grew up on the east coast eating a lot of good Italian food both in restaurants and homemade by family.	It was one of my favorite Italian dishes I‚Äôve ever tried.
I don't think the kids would enjoy because it's so loud. Too much gluten can make my stomach cramp.	I prefer a more quiet place. I prefer a more gluten-free place.	so you can have those "not so healthy" cheesecakes for dessert!	Love the food, also they have gluten free menu.	It can seem a bit stuffy when you are young but when you're an old timer like me just wanting to get away from the kids for a night, you appreciate the dimly lit rooms, quiet music, and non crowds.	Love the food, also they have gluten free menu.	Great place to relax and have a bite to eat and get away from the loudness of the city.	The ambiance, foods and hosts are excellent!
I don't like family style restaurants. The food is usually cold there.	I prefer a place where I can remain undisturbed. I prefer steaming hot food.	The atmosphere seems like a place my parents (or grandparents) would have enjoyed but the food and service was great.	Great food but service can be better.	Food is good, open late and a drive thru !!	In good weather, I particularly enjoy the outdoor dining.	Good food in a relaxed atmosphere.	üòãüòã Good cozy place with decent food and drinks
Fried stuff has way too many calories. It looks too fancy.	I prefer healthier food. I prefer a more casual place.	The Au Gratin Potatoes side was incredibly rich and cheesy.	Rice in the rice pudding is so hard.	Nice dinner setting, with huge portions.	Food is absolutely delicious and there are so many choices!	But menu is just beautiful and food is great too.	I go to fabulous restaurants on a regular basis, Michelin stars, Top Chef, etc, so food wise, excellent of course.
I'm pescatarian. When I have experimental cuisine food choices are very limited.	I prefer fish. I prefer a more varied menu.	I'm vegan for health reasons.	Food is always great...lot of variety in veg and non	Well prepared and delicious Indian food (I ate vegetarian food).	I selected the pasta option minus the seafood.	Everything delicious with an exception of the shrimps.	delicious steaks and seafood...
I often spend between $50 and $75 for a meal for two. Too much gluten can make my stomach cramp.	I prefer a place that is less expensive. I prefer a more gluten-free place.	Food is so good and feels like I'm eating healthy even of	$7.99 for a 4 big pieces of falafel, fresh pita, hummos and salad is a great deal.	Lamb and beef plate is great, I get that with hummus veggies and rice.	Love the food, also they have gluten free menu.	I go here whenever I want something Good, filling, and great price..	Such a great selection of vegetarian & vegan options too!
Jalapenos are my limit. That steak is overcooked.	I prefer food without jalapenos. I prefer my steak medium rare.	were truly from the smoker, and they had the feel of mostly grilled ribs to me, which I do not like.	Fish tacos are so good, sauce is very hot	I only eat Beef Brisket here because is delicious!	I only eat Beef Brisket here because is delicious!	Fish tacos are so good, sauce is very hot	I always get the chicken flautas entree, garlic shrimp tacos and the cheese
Anything slow-cooked or grilled is delicious. When I have experimental cuisine food choices are very limited.	I prefer beef, chicken, lamb, pork, etc. I prefer a more varied menu.	I've had at other high class restaurants, but the chimichurri and sun dried tomato puree that accompanied	Lamb and beef plate is great, I get that with hummus veggies and rice.	Tomato bisque and grilled cheese were excellent too.	My favorite selections are the Steak Tartare and the Lamb Chops.	Turkey burger and fries, both very tasty!	Chicken, lamb, pork and so many cuts of beef that you will easily find the one you love.
It doesn't have a view. Garlic gives me terrible stomach cramps.	I prefer a good view. I prefer a place that doesn't use garlic.	Food is great but this place stands above the rest because of the homemade red salsa .	The menu does not offer a lot of things and mostly offers steaks and chicken courses.	The Lasagna is just amazing and is the food I order the most.	In good weather, I particularly enjoy the outdoor dining.	Pleasant atmosphere and best deep dish pizza	Food is great but this place stands above the rest because of the homemade red salsa .
That's too much fried stuff. I think the last time I went to a Thai place I was in college.	I prefer lighter food. I prefer Italian food.	Dim sum is excellent, main course - chicken - was not as spicey as I thought.	Loved the wonton soup and duck salad Terrific upscale Chinese, get the soup dumplings or you've failed.	Chinese food here - super tasty.	It was by far my favorite Italian cuisine compared to the other three	I always order tacos and rice.	I grew up on the east coast eating a lot of good Italian food both in restaurants and homemade by family.
I love trying new cuisines from other cultures around the world. Not enough vegetarian options.	I prefer a place that serves food from a specific culture/country. I prefer more vegetarian options.	I grew up on the east coast eating a lot of good Italian food both in restaurants and homemade by family.	I love love love Indian food and have tested plenty of restaurants.	I came here from New York this past weekend with my family and it is by far the best Indian food I have ever had.	Such a great selection of vegetarian & vegan options too!	Had good vegetarian options as well.	but it is fine dining Very good restaurants for meat lovers, you can choose from all kinds of steaks.
Indian food gives me digestion problems. I don't feel like eating local cuisine.	I prefer more digestible food. I prefer a place with an international menu.	I love love love Indian food and have tested plenty of restaurants.	Well prepared and delicious Indian food (I ate vegetarian food).	Chinese food here - super tasty.	But menu is just beautiful and food is great too.	Excellent portions, fresh ingredients and a solid mainstream selection of things to taste.	Quality food at a more than reasonable price.
I heard they had terrible service. I don't like going to high-end places.	I prefer an attentive service. I prefer less expensive places.	Great place & service at reasonable prices.	I always get fantastic customer service there.	Great food but service can be better.	Great place & service at reasonable prices.	The service is rapid, prices are convenient, good atmosphere.	Service is typically great.
I love eating and talking. I think I'll skip the vegetables for today.	I prefer a place where it's easy to have a conversation. I prefer a restaurant that serves only meat.	Food is so good and feels like I'm eating healthy even of	Food is always great...lot of variety in veg and non	I'm vegan for health reasons.	but it is fine dining Very good restaurants for meat lovers, you can choose from all kinds of steaks.	Food is good, open late and a drive thru !!	The food was excellent, I like my steak
They don't seem to serve alcohol. That's a really bad salad.	I prefer a place that serves alcohol. I prefer a fancier salad.	The salad bar is, in fact, exquisite.	This is a 4 star place for American food which also serves alcohol.	Their salad bar items are seasoned really well, and of course the cheesy bread is delicious.	Food is good, lots of choices at the salad bar.	They have a nice drink and wine selection to go with your meal.	Excellent drinks , just okay food.
A good Merlot makes the meal better. I wouldn't say I like tapas.	I prefer wine over beer. I prefer a more formal dining experience.	It was by far my favorite Italian cuisine compared to the other three	It was one of my favorite Italian dishes I‚Äôve ever tried.	The food is always perfect, I recommend the eggplant parmesan, it is succulent.	Atmosphere is wonderful and the bar is always attentive to keep your not waiting around if you want another glass.	Excellent drinks , just okay food.	Food is good and wine is OK.
It doesn't have a view. I'm not in mood for pizza.	I prefer a good view. I prefer a more sophisticated cuisine.	I am picky when it comes to pizza, but this place rocked.	I guess I didn't expect it to be very good because it has a great view already, so the food mustn't be good.	I have not tasted a better pizza anywhere else, And even though we had to wait outside, it was well worth the wait!	In good weather, I particularly enjoy the outdoor dining.	The restaurant has a great view and both choices of food were simply delicious and sophisticated.	A great place for a meal or just cocktails and a view.
If there was a falafel I'd be down with it. I can't eat animals.	I prefer the falafel. I prefer vegetarian food.	They even made us fresh falafels which were super delish.	The lamb burgers are huge and yummy and served with tzatziki.	I only eat Beef Brisket here because is delicious!	I only eat Beef Brisket here because is delicious!	Lamb and beef plate is great, I get that with hummus veggies and rice.	The lamb burgers are huge and yummy and served with tzatziki.
Spicy food gives me heartburn. I don't eat fast food.	I prefer non-spicy food. I prefer a more healthy place.	I always get the chicken flautas entree, garlic shrimp tacos and the cheese	Food is so good and feels like I'm eating healthy even of	Fish tacos are so good, sauce is very hot	One of my top places for tasty quality meals.	the food is just as good.	One of my preferred places for tasty Quality Meals.
[truncated: 645 more rows]

## Sheet: Categorization of Differences
I'm too tired and hungry to wait.	I prefer a place with faster service.
[truncated: 172 more rows]
